# Supplementary material for: Metal-free borylative ring-opening of vinyl epoxides and aziridines
Source: Royal Society of Chemistry journal article supplement (doi:10.1039/c3ob41328d), 2013-01-01
Supplement: c3ob41328d.pdf [file c3ob41328d.pdf]

## Supporting Information

# Metal-Free Borylative Ring-Opening of Vinyl Epoxides and Aziridines

Xavier Sanz,<sup>[a,b]</sup> Graham M. Lee,<sup>[a,c]</sup> Cristina Pubill-Ulldemolins,<sup>\*[a,b]</sup> Amadeu Bonet,<sup>[a]</sup> Henrik Gulyás,<sup>[a]</sup>  
Stephen A. Westcott,<sup>[c]</sup> Carles Bo,<sup>\*[b]</sup> Elena Fernández<sup>\*[a]</sup>

[a] *Mr. Xavier Sanz, Mr. Graham M. Lee, Dr. Cristina Pubill-Ulldemolins, Dr. Amadeu Bonet, Dr.*

*Henrik Gulyás, Dr. Elena Fernández*

*Department Química Física i Inorgànica*

*Univ. Rovira i Virgili, C/ Marcel·lí Domingo s/n, 43007 Tarragona (Spain)*

*Fax: (+) 34 977 559563*

*E-mail: [mariaelena.fernandez@urv.cat](mailto:mariaelena.fernandez@urv.cat)*

*[http://www.quimica.urv.cat/tecat/catalytic\\_organoborane\\_chemistry.php](http://www.quimica.urv.cat/tecat/catalytic_organoborane_chemistry.php)*

[b] *Dr. Carles Bo*

*Institute of Chemical Research of Catalonia (ICIQ). Avda. Països Catalans, 17. 43007 Tarragona  
(Spain)*

[c] *Prof. Stephen A. Westcott*

*Department of Chemistry and Biochemistry, Mount Allison University, Canada*

## Contents

1. Instrumentation and chemicals.
2. General procedures for the organocatalytic borylative ring-opening of vinyl epoxides and vinyl aziridines with  $B_2pin_2$ .
3. The oxidation protocol
4. Allylation reaction of allyl boronates with benzaldehyde
5. NMR spectra
6. Data of crystal and structure refinement for 2-(hydroxy(phenyl)methyl)cyclohex-3-enol (6)
7. Computational details
8. Computed data for the involved species in the conjugate attack
9. Computed data for the involved species in the direct attack
10. PKa computation details
11. Geometries of the involved species

## 1. Instrumentation and chemicals

All reactions and manipulations were carried out under argon atmosphere using Schlenk-type techniques and oven-dried (120 °C) glassware, which was cooled in a stream of argon. Solvents were dried using a solvent purification system (Pure SOLV system-4). Substrates 3,4-epoxy-1-cyclohexene (**1**), 2-methyl-2-vinylloxirane (**7**), PCy<sub>3</sub> and Cu(acac)<sub>2</sub> were purchased from Sigma-Aldrich, and used as received. The substrates 3,4-aziridine-1-cyclohexene (**10**), 2-methyl-2-vinylaziridine (**11**) and 3-methyl-2-vinylaziridine (**12**), were prepared following the methodology established in the literature.<sup>[1]</sup>

Deuterated chloroform (CDCl<sub>3</sub>) was used as solvent for routine NMR measurements. NMR spectra were obtained using a Varian Mercury 400 spectrometer. <sup>1</sup>H NMR and <sup>13</sup>C{<sup>1</sup>H} NMR chemical shifts (δ) are reported in ppm relative to tetramethylsilane, referenced to the chemical shift of residual solvents resonances. <sup>11</sup>B{<sup>1</sup>H} NMR chemical shifts are reported in ppm (δ) relative to BF<sub>3</sub>·OEt<sub>2</sub> (δ <sup>11</sup>B{<sup>1</sup>H} = 0.00 ppm) as the external reference. Coupling constants (*J*) are given in Hz, and the multiplicity of the NMR signals is described as singlet (s), doublet (d), triplet (t), quartet (q) and multiplet (m).

GC-MS. Accurate mass determinations were carried out on a Kratos Concept IS spectrometer.

## 2. General procedures for the organocatalytic borylative ring-opening of vinyl epoxides and vinyl aziridines with B<sub>2</sub>pin<sub>2</sub>.

**Borylation of 3,4-epoxy-1-cyclohexene (1).** *Organocatalytic method:* The phosphine PCy<sub>3</sub> (9.54 mg, 10 mol%), sodium methoxide (33.4 mg, 0.6 mmol) and bis(pinacolato)diboron (114 mg, 0.45mmol) were transferred into an oven-dried Schlenk tube under argon. THF (3 mL) was added. The mixture was stirred for 10 minutes at room temperature to dissolve the phosphine and the borane reagent completely. The substrate (33 μL, 0.3 mmol) and MeOH (100 μl, 2.5 mmol) were added, and the reaction mixture was stirred at room temperature for 6 hours. An aliquot of 0.2 mL was taken from the solution and gently concentrated on a rotary evaporator at RT, and analyzed by <sup>1</sup>H-NMR showing that one single product was formed from the substrate. The obtained 4-cyclohexenyl hydroxyboronate (**2**) was purified by flash chromatography using a silica gel column previously deactivated with triethylamine, and a mixture of petroleum ether and ethyl acetate (10:3) as eluent (R.f.=0.35). The product could be isolated in 41.7 mg (62% yield).

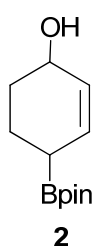

$^1\text{H}$  NMR (400 MHz,  $\text{CDCl}_3$ )  $\delta$  (ppm) 5.88 (dd,  $J=10, 2.8$  Hz, 1H), 5.71 (dt,  $J=10, 2.6$  Hz, 1H), 4.18 (s, 1 H), 1.88-1.76 (m, 2 H), 1.73-1.52 (m, 3 H), 1.21 (s, 6 H), 1.19 (s, 6H).  $^{13}\text{C}$  NMR (100 MHz,  $\text{CDCl}_3$ )  $\delta$  (ppm) 131.72, 128.61, 83.66, 65.47, 32.06, 25.29, 25.04, 24.91, 20.50  
 $^{11}\text{B}$  NMR (128.52 MHz,  $\text{CDCl}_3$ )  $\delta$  (ppm) 33.26.

*Copper mediated borylation:* CuCl (1.5 mg, 0.015 mmol), 1,3-Bis(diphenylphosphino)propane (dppp) (13 mg, 0.03 mmol), cesium carbonate (2 eq.) and bis(pinacolato)diboron (114 mg, 0.45mmol) were transferred into an oven-dried Schlenk tube under argon. THF (3 mL) was added. The mixture was stirred for 10 minutes at room temperature to dissolve the borane reagent completely. The substrate (33  $\mu\text{L}$ , 0.3 mmol) and MeOH (100  $\mu\text{l}$ , 2.5 mmol) were added, and the reaction mixture was stirred at room temperature for 6 hours. An aliquot of 0.2 mL was taken from the solution and gently concentrated on a rotary evaporator at RT, and analyzed by  $^1\text{H}$ -NMR.

**Borylation of 2-methyl-2-vinyloxirane (7):** The phosphine  $\text{PCy}_3$  (9.54 mg, 10 mol%), sodium methoxide (33.4 mg, 0.6 mmol) and bis(pinacolato)diboron (114 mg, 0.45mmol) were transferred into an oven-dried Schlenk tube under argon. THF (3 mL) was added. The mixture was stirred for 10 minutes at room temperature to dissolve the phosphine and the borane reagent completely. The substrate (33  $\mu\text{L}$ , 0.3 mmol) and MeOH (100  $\mu\text{l}$ , 2.5 mmol) were added, and the reaction mixture was stirred at 50°C for 20 hours. The reaction mixture was cooled to room temperature. An aliquot of 0.2 mL was taken from the solution and gently concentrated on a rotary evaporator at RT, and analyzed by  $^1\text{H}$ -NMR to probe that one single product was formed from the substrate. The obtained 2-methyl-4-pinacolboryl-butenol (**8**) was purified by flash chromatography using a silica gel column previously treated with triethylamine, and a mixture of petroleum ether and ethyl acetate (1:1) as eluent (R.f.=0.42). The product could be isolated in 42.0 mg (66% yield).

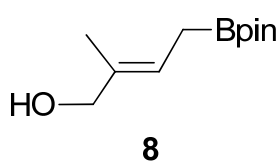

$^1\text{H}$  NMR (400 MHz,  $\text{CDCl}_3$ )  $\delta$  (ppm) 5.51 (t,  $J=8$  Hz, 1H), 4.40 (bs, 1H), 4.00 (s, 2H), 1.70 (s, 3H), 1.65 (d, 2H), 1.21 (s, 6H), 1.16 (s, 6H).  $^{13}\text{C}$  NMR (100 MHz,  $\text{CDCl}_3$ )  $\delta$  (ppm) 134.86, 121.34, 83.24, 69.20, 24.74, 18.61, 13.62

$^{11}\text{B}$  NMR (128.52 MHz,  $\text{CDCl}_3$ )  $\delta$  (ppm) 33.41

**Borylation of 3,4-aziridine-1-cyclohexene (10):** The phosphine  $\text{PCy}_3$  (9.54 mg, 10 mol%), sodium methoxide (33.4 mg, 0.6 mmol) and bis(pinacolato)diboron (114 mg, 0.45mmol) were transferred into an oven-dried Schlenk tube under argon. THF (3 mL) was added. The mixture was stirred for 10 minutes at room temperature to dissolve the phosphine and the borane reagent completely. The substrate (0.3 mmol) and MeOH (100  $\mu\text{l}$ , 2.5 mmol) were added, and the reaction mixture was stirred at 50°C for 20 hours. The reaction mixture was cooled to room temperature. An aliquot of 0.2 mL was taken from the solution and gently concentrated on a rotary evaporator at RT, and analyzed by  $^1\text{H-NMR}$  to probe that one single product was formed from the substrate. The obtained 1,4-cyclohexenyl tosylaminoboronate (**13**) was purified by flash chromatography using a silica gel column previously treated with triethylamine, and a mixture of petroleum ether and ethyl acetate (7:3) as eluent (R.f.=0.49). The product could be isolated in 80.3 mg (71% yield).

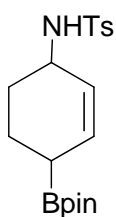

**13**

$^1\text{H NMR}$  (400 MHz,  $\text{CDCl}_3$ )  $\delta$  (ppm) 7.77 (d, 2H,  $J = 8.0$  Hz), 7.28 (d, 2H,  $J = 8.0$  Hz), 5.82-5.79 (m, 1H), 5.30-5.26 (dt, 1H,  $J = 9.8, 3.5$  Hz), 4.41 (d, 1H,  $J = 8.0$  Hz), 3.79 (br s, 1H), 2.43 (s, 3H), 1.52-1.90 (m, 5H), 1.20 (s, 12H).  $^{13}\text{C NMR}$  (100 MHz,  $\text{CDCl}_3$ )  $\delta$  (ppm) 143.2, 138.3, 132.4, 129.6, 127.0, 125.4, 83.4, 48.8, 30.1, 25.0, 24.7, 24.6, 21.6, 20.6.  $^{11}\text{B NMR}$  (128.52 MHz,  $\text{CDCl}_3$ )  $\delta$  (ppm) 33.44. Spectral data is in accordance with the literature.<sup>[2]</sup>

**Borylation of 2-methyl-2-vinylaziridine (11) and 3-methyl-2-vinylaziridine (12):** The phosphine  $\text{PCy}_3$  (9.54 mg, 10 mol%), sodium methoxide (33.4 mg, 0.6 mmol) and bis(pinacolato)diboron (114 mg, 0.45mmol) were transferred into an oven-dried Schlenk tube under argon. THF (3 mL) was added. The mixture was stirred for 10 minutes at room temperature to dissolve the phosphine and the borane reagent completely. The substrate mixture (0.3 mmol) and MeOH (100  $\mu\text{l}$ , 2.5 mmol) were added, and the reaction mixture was stirred at 50°C for 20 hours. The reaction mixture was cooled to room temperature. An aliquot of 0.2 mL was taken from the solution and gently concentrated on a rotary evaporator at RT, and analyzed by  $^1\text{H-NMR}$  to probe that one single product was formed from the substrate.

### 3. The oxidation protocol

The allyl boronates obtained in the above described procedure were converted into the corresponding alcohols in the following manner. To the crude organoboron product (cc. 0.3 mmol) in THF (3 mL), sodium perborate (90 mg, 0.9 mmol) and water (3 mL) were added. The reaction mixture was stirred vigorously overnight at room temperature. The reaction mixture was diluted with water and then extracted with dichloromethane (3 x 20mL). The combined organic phase was dried over MgSO<sub>4</sub> and concentrated.

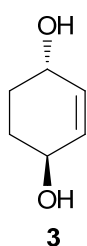

Product **3** was purified by flash chromatography using a silica gel column with ethyl acetate as eluent (R.f.=0.70). The product could be isolated in 32.5 mg (95% yield). Spectral data is in accordance with the literature<sup>[3]</sup>

Product **9** was purified by flash chromatography using a silica gel column with ethyl acetate as eluent (R.f.=0.52). The product could be isolated in 26.7 mg (87% yield).

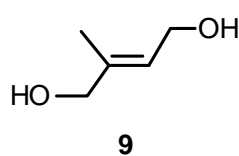

<sup>1</sup>H NMR (400 MHz, CDCl<sub>3</sub>) δ (ppm) 5.70-5.65 (tq, 1H, J= 6.8, 1.6 Hz), 4.24-4.22 (d, 2 H, J= 6.8 Hz), 4.01 (s, 2 H), 1.71 (s, 3 H). <sup>13</sup>C NMR (100 MHz, CDCl<sub>3</sub>) δ (ppm) 138.87, 124.14, 68.41, 59.47, 30.14.

Product **14** was purified by flash chromatography using a silica gel column with ethyl acetate as eluent (R.f.=0.75). The product could be isolated in 72.2 mg (90% yield).

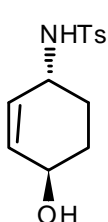

<sup>1</sup>H NMR (400 MHz, CDCl<sub>3</sub>) δ (ppm) 7.76 (d, 2H, J = 8.0 Hz), 7.31 (d, 2H, J = 8.0 Hz), 5.78-5.74 (d, 1H J = 10 Hz), 5.45-5.43 (d, 1H J = 10 Hz), 4.48 (d, 1H), 4.18 (m, 1H), 3.88-3.84 (m, 1H), 2.44 (s, 3H), 2.04-1.95 (m, 3H), 1.35-1.50 (m, 2H). <sup>13</sup>C NMR (100 MHz, CDCl<sub>3</sub>) δ (ppm) 143.5, 138.1, 134.1, 129.9, 126.9, 65.6, 49.6, 30.7, 28.7, 21.6.

Spectral data is in accordance with the literature<sup>[2]</sup>

Products **15/16** were purified as a mixture of diols by flash chromatography using a silica gel column with ethyl acetate as eluent (R.f.=0.56). The product could be isolated in 30.6 mg (40% yield).

#### 4. Allylation reaction of allyl boronates with benzaldehyde

The allyl boronates **2** and **5** obtained in the organocatalytic and copper mediated borylation, respectively, were derivatized with benzaldehyde. To the crude organoboron product (cc. 0.3 mmol) in THF (3 mL), benzaldehyde (100  $\mu$ L, 0.9 mmol) was added. The reaction mixture was stirred vigorously overnight at room temperature. Product **4** was purified by flash chromatography using a silica gel column with ethyl acetate as eluent (R.f.=0.80). The product could be isolated in 56.4 mg (92% yield). Product **6** was purified by flash chromatography using a silica gel column and a mixture of petroleum ether and ethyl acetate (7:3) as eluent (R.f.=0.49). The product could be isolated in 38.6 mg (63% yield). Spectral data for **4** is in accordance with the literature<sup>[2]</sup> Spectral data for **6** is in accordance with the literature<sup>[3]</sup>.

#### 5. NMR spectra

##### <sup>1</sup>H NMR spectra of 1,4-cyclohexenyl hydroxyboronate (**2**) in CDCl<sub>3</sub>

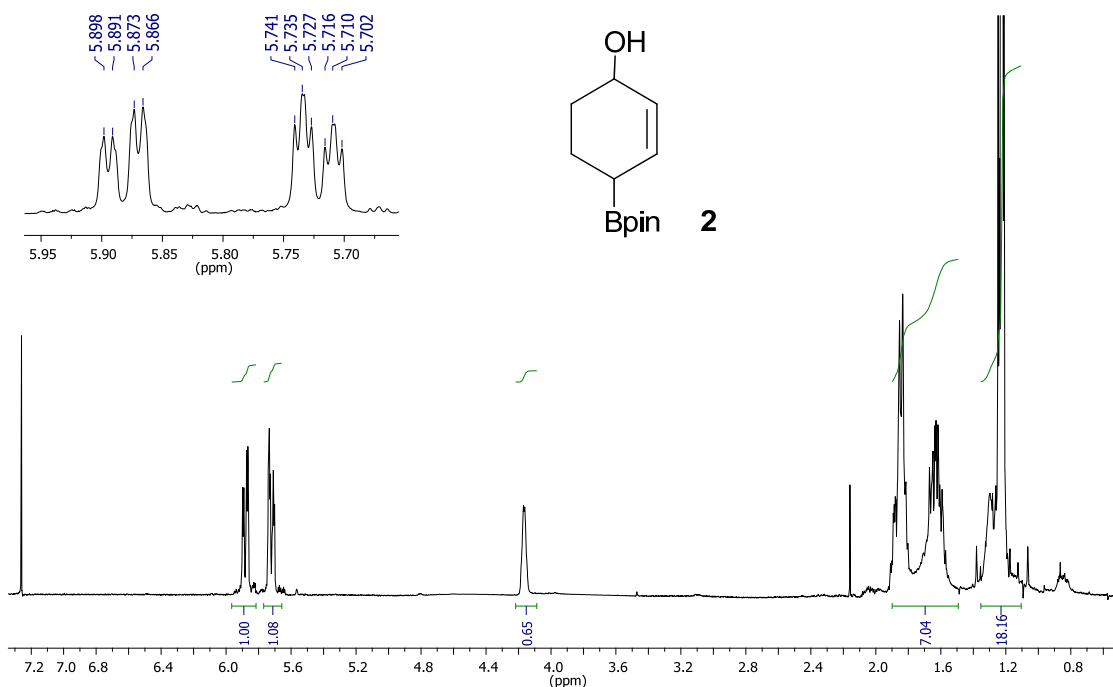

$^{13}\text{C}$  NMR spectra of 1,4-cyclohexenyl hydroxyboronate (**2**) in  $\text{CDCl}_3$

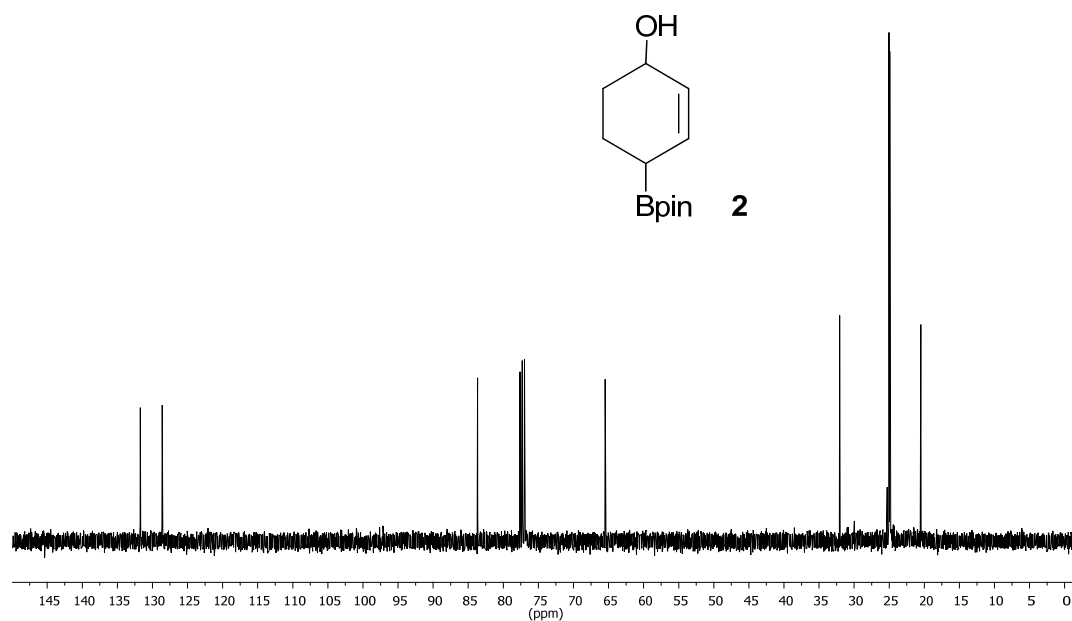

$^{11}\text{B}$  NMR spectra of 1,4-cyclohexenyl hydroxyboronate (**2**) in  $\text{CDCl}_3$

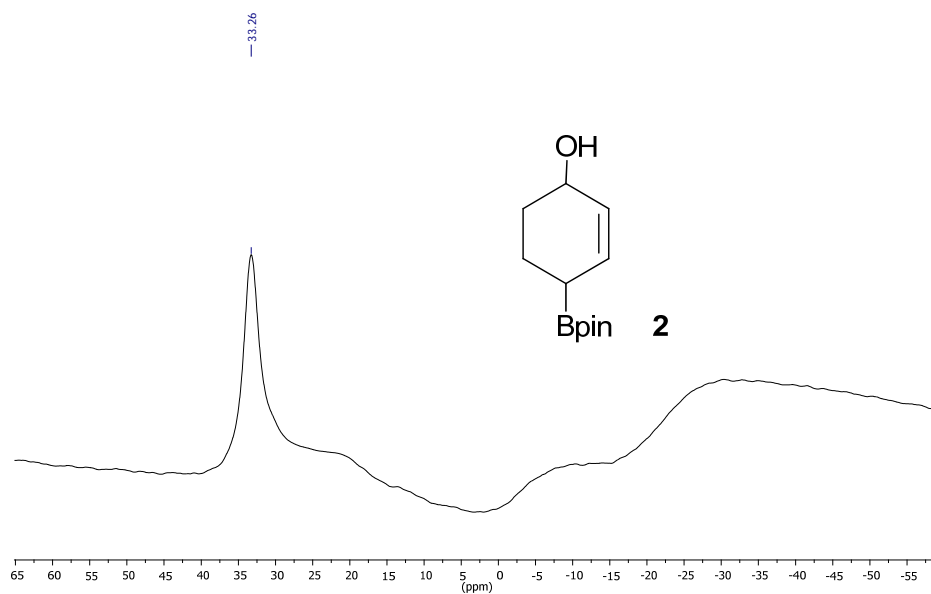



**<sup>1</sup>H NMR spectra of 2-methyl-4-pinacolboryl-butenol (8) in CDCl<sub>3</sub>**

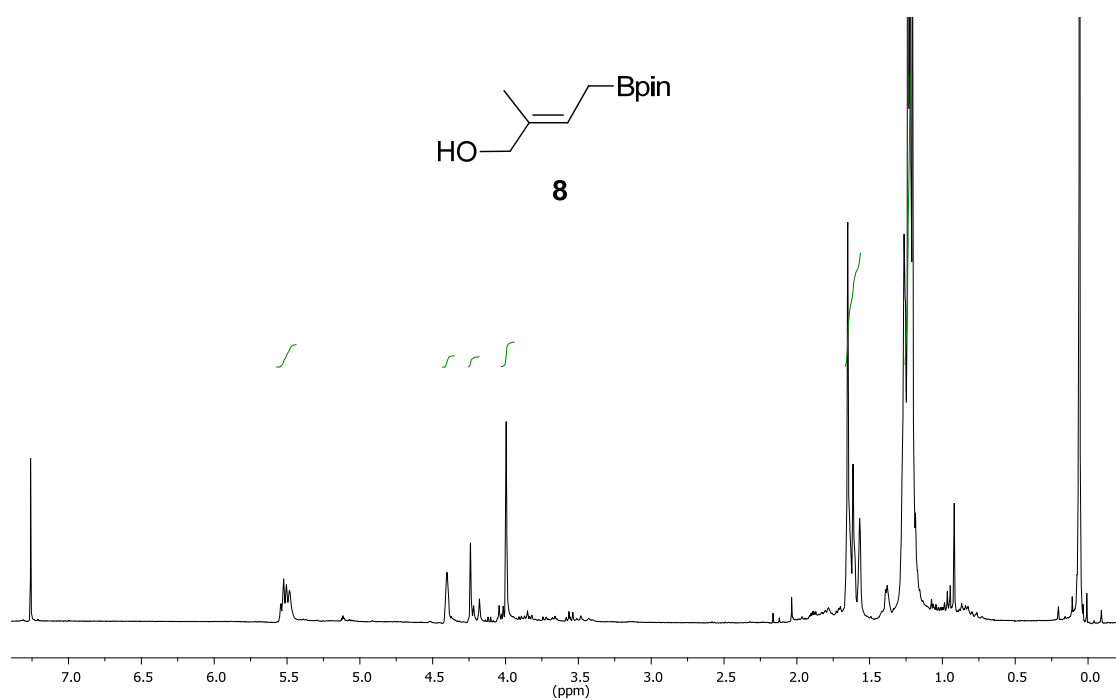

**<sup>13</sup>C NMR spectra of 2-methyl-4-pinacolboryl-butenol (8) in CDCl<sub>3</sub>**

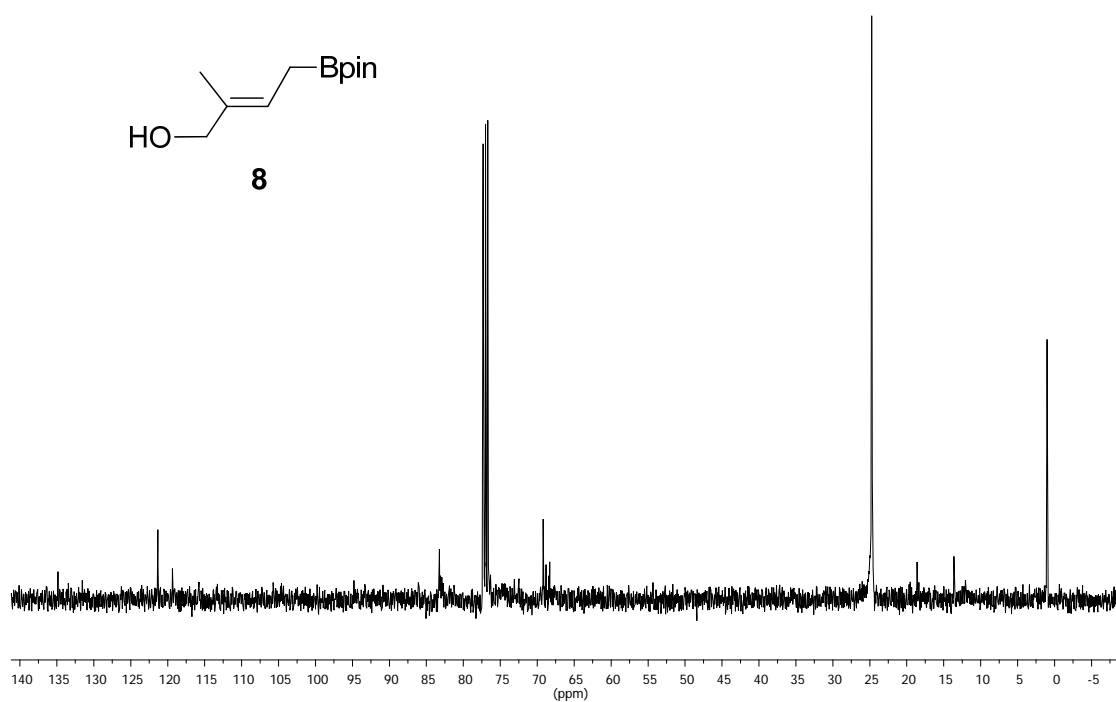

**$^{11}\text{B}$  NMR spectra of 2-methyl-4-pinacolboryl-butenol (**8**) in  $\text{CDCl}_3$**

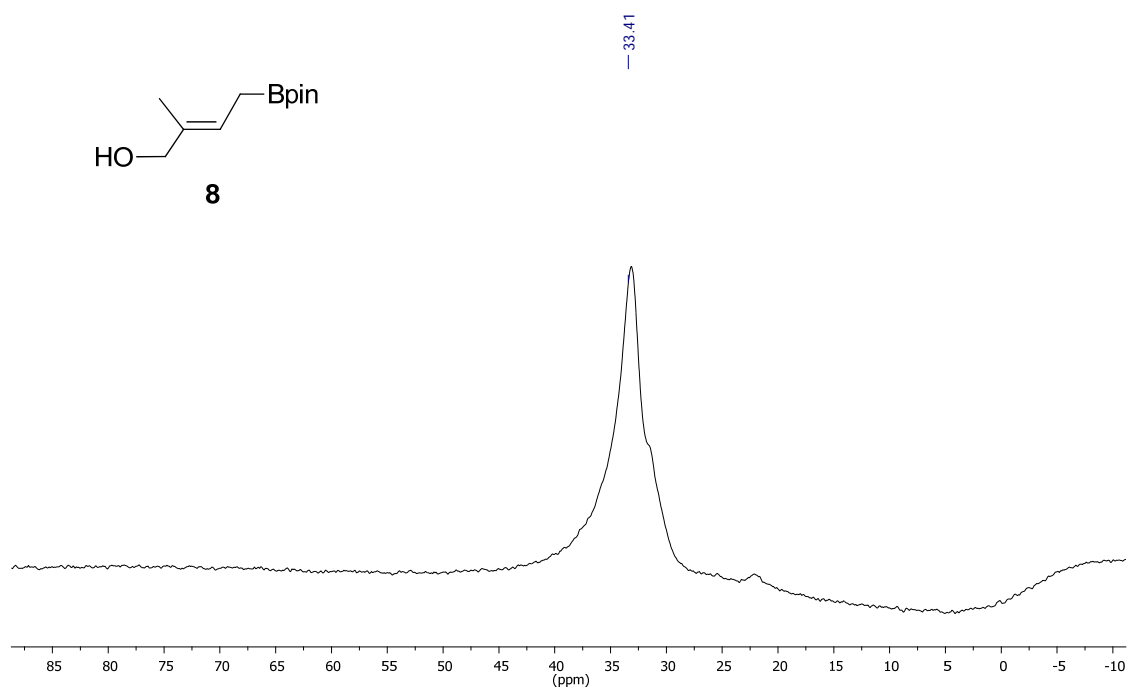

**$^1\text{H}$  NMR spectra of 1,4-cyclohexenyl tosylaminoboronate (**13**) in  $\text{CDCl}_3$**

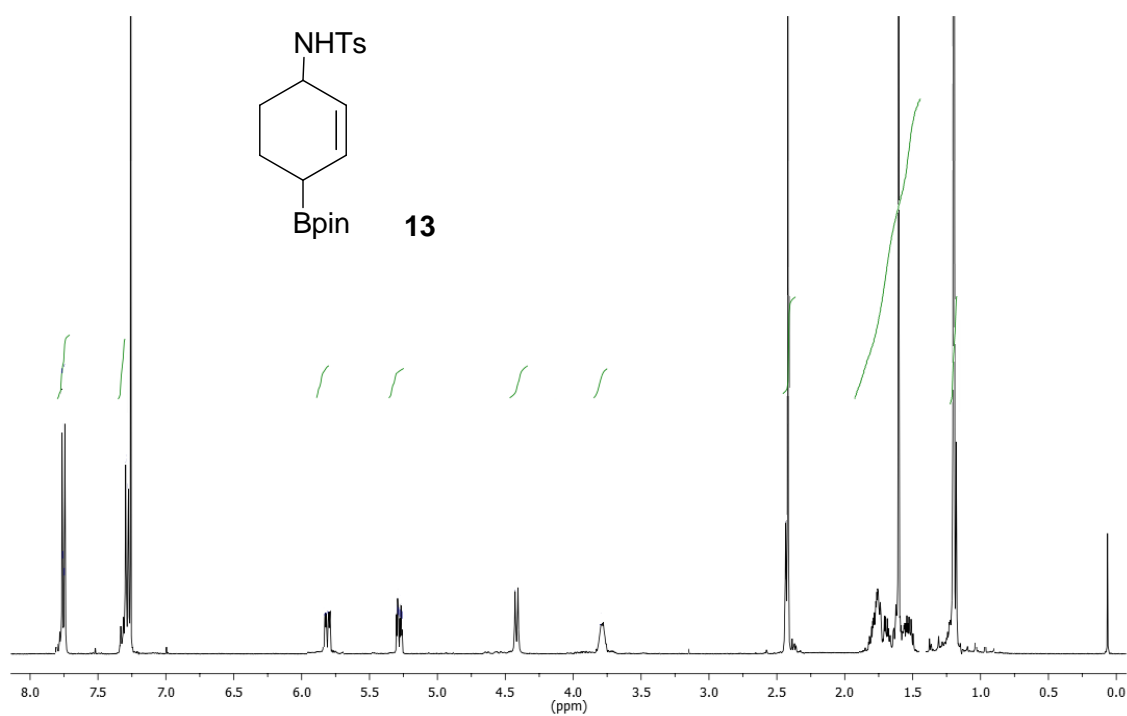

$^{13}\text{C}$  NMR spectra of 1,4-cyclohexenyl tosylaminoboronate (**13**) in  $\text{CDCl}_3$

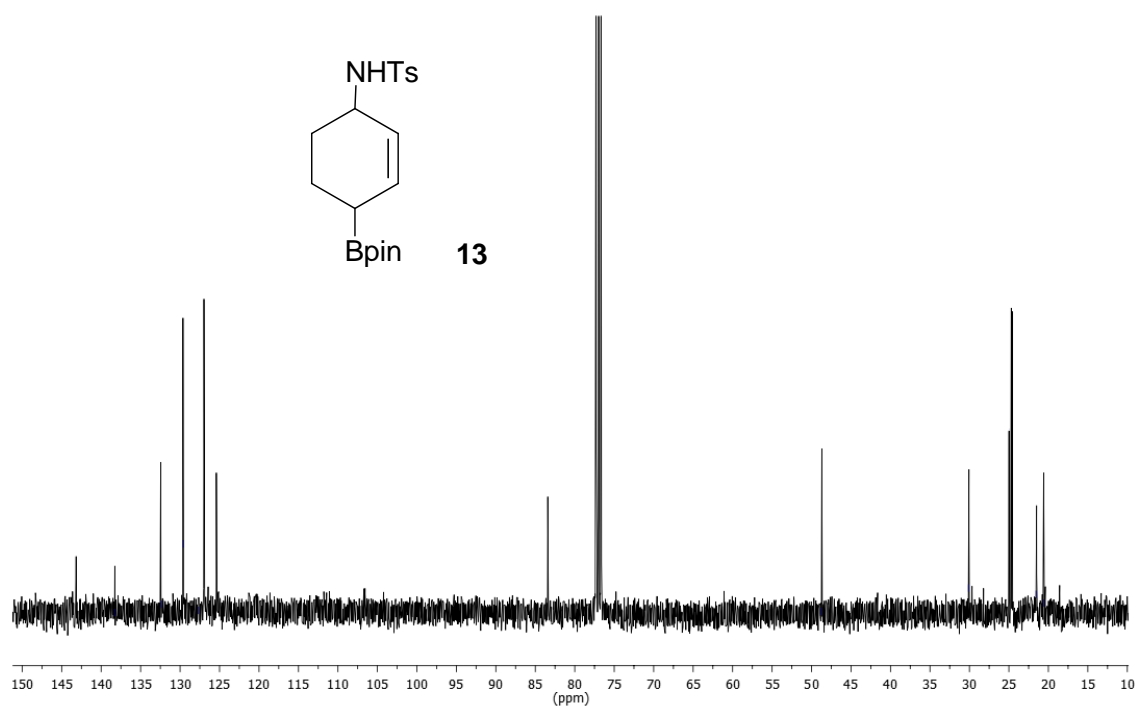

$^{11}\text{B}$  NMR spectra of 1,4-cyclohexenyl tosylaminoboronate (**13**) in  $\text{CDCl}_3$

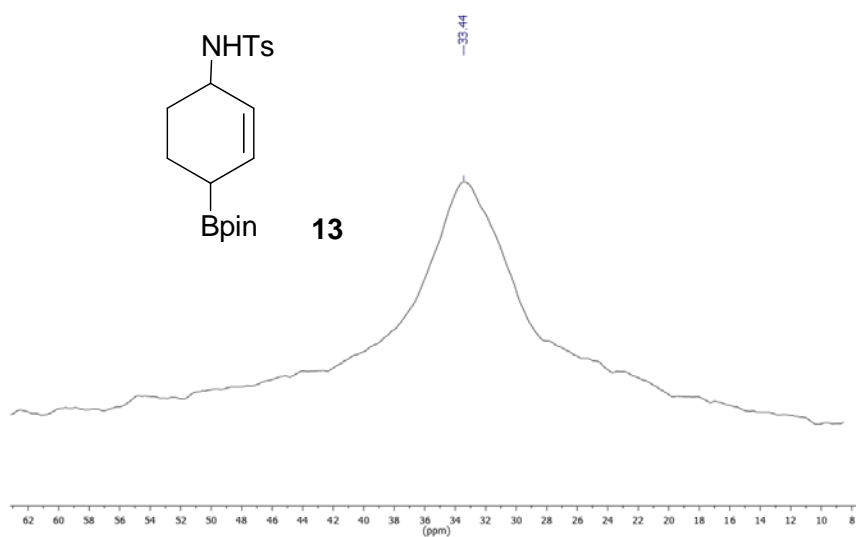

<sup>1</sup>H NMR spectra of 2-methyl-1,4-butendiol (**9**) in CDCl<sub>3</sub>

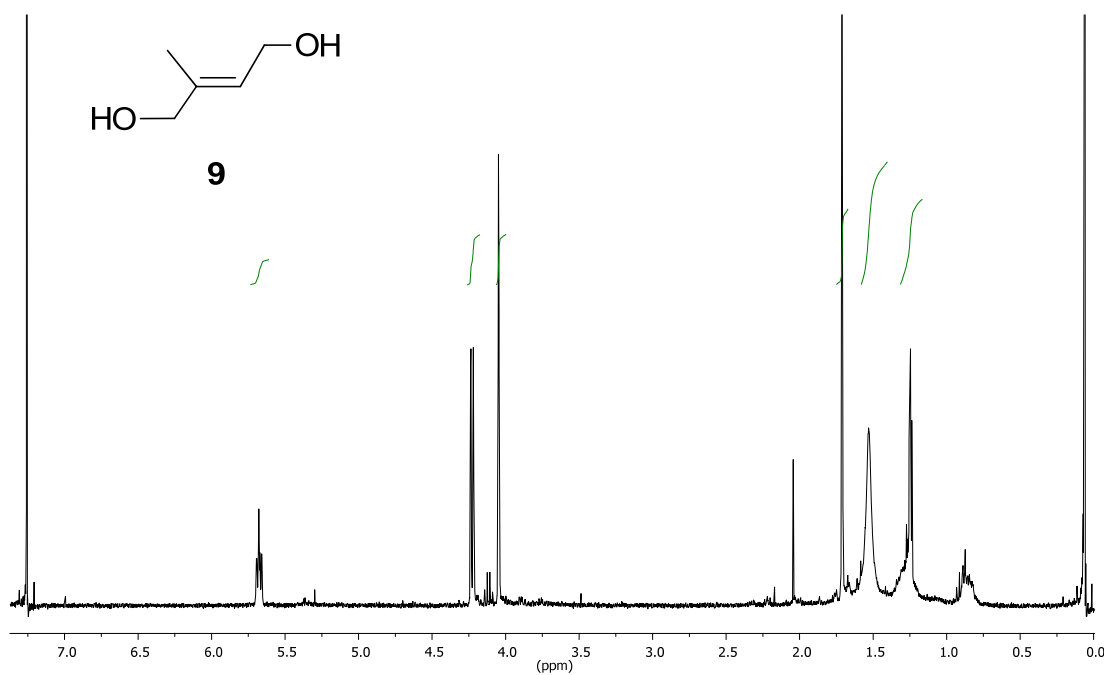

<sup>13</sup>C NMR spectra of 2-methyl-1,4-butendiol (**9**) in CDCl<sub>3</sub>

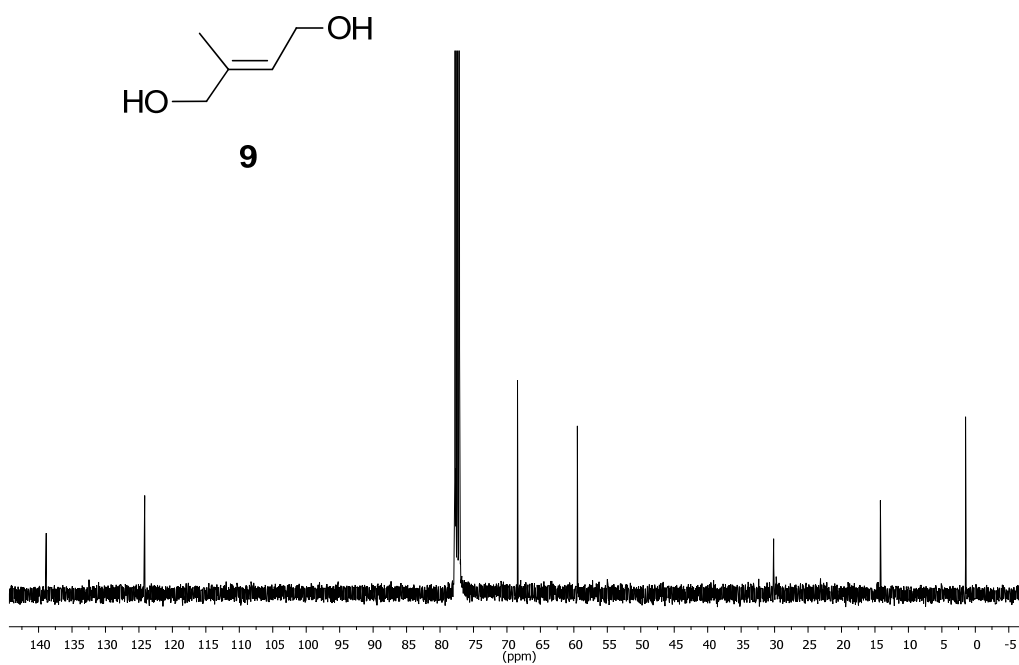

**<sup>1</sup>H NMR spectra of 1,4-cyclohexenyl tosylaminoalcohol (14) in CDCl<sub>3</sub>**

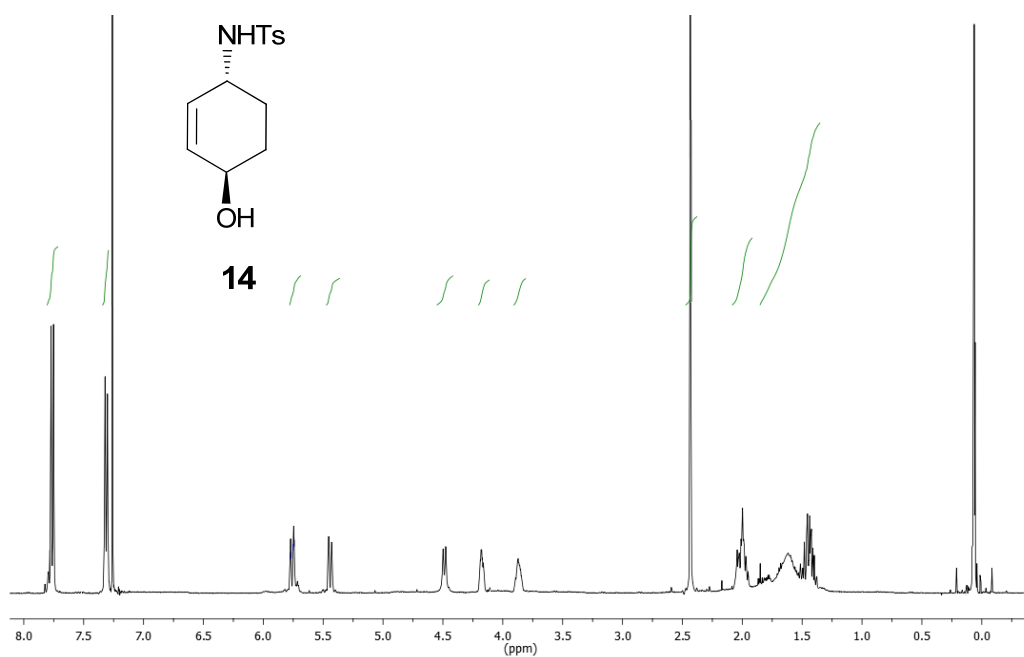

**<sup>13</sup>C NMR spectra of 1,4-cyclohexenyl tosylaminoalcohol (14) in CDCl<sub>3</sub>**

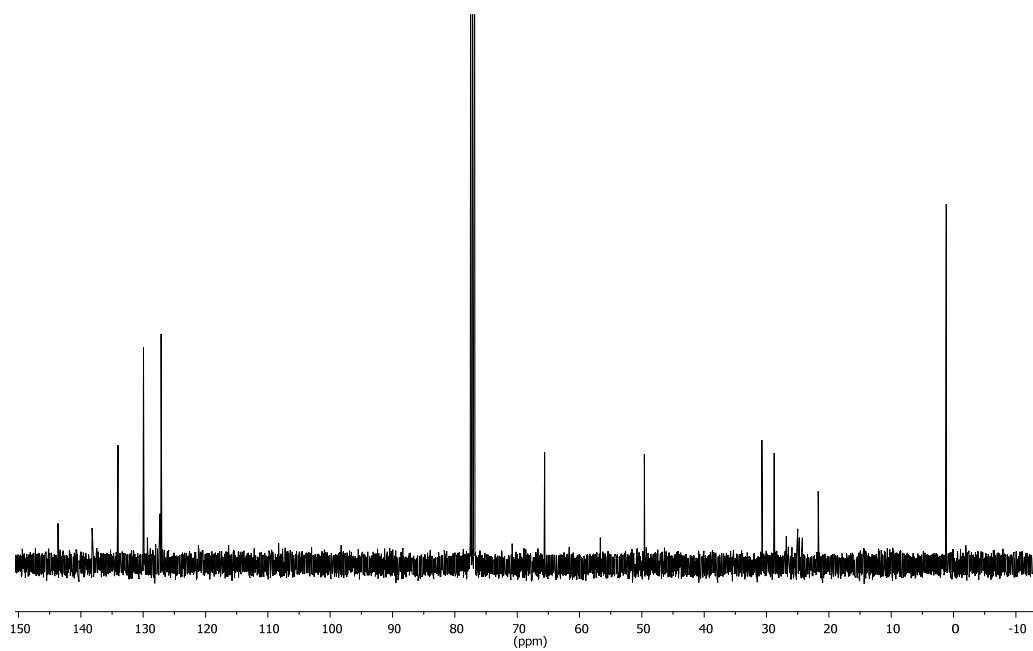

### <sup>1</sup>H NMR spectra of mixture 15/16 in CDCl<sub>3</sub>

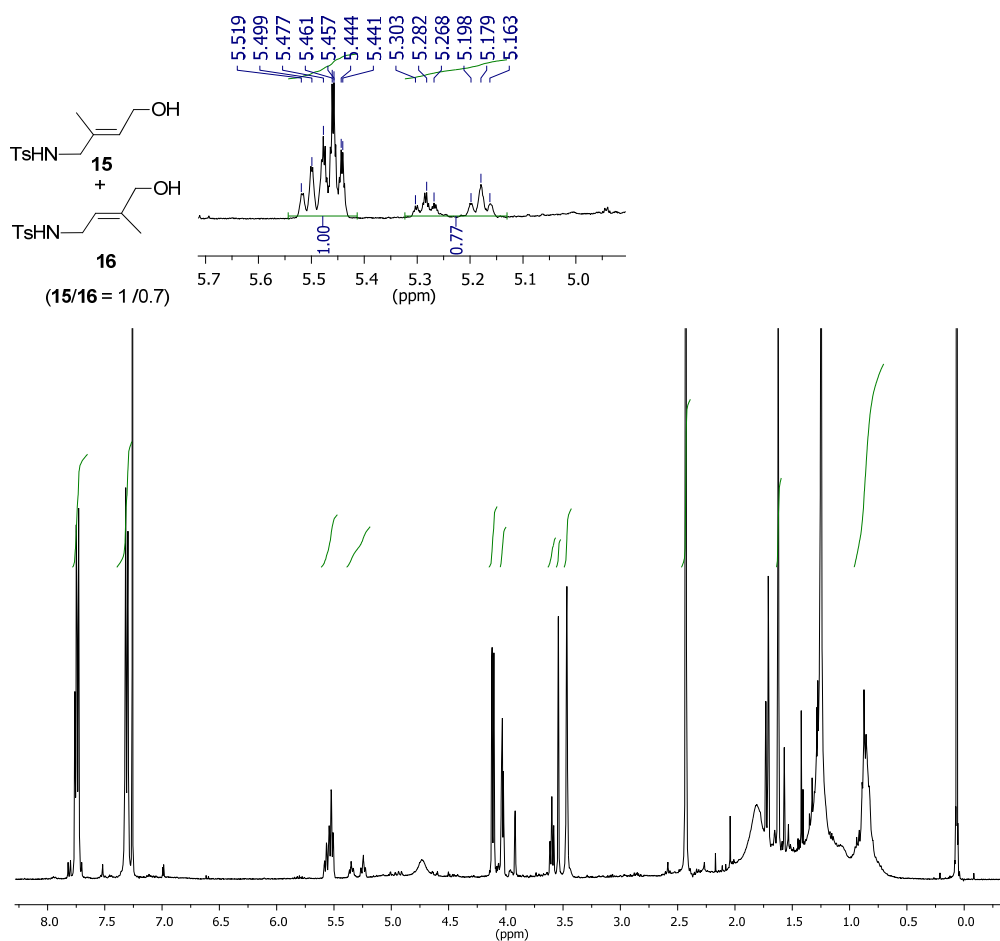

### <sup>13</sup>C NMR spectra of mixture 15/16 in CDCl<sub>3</sub>

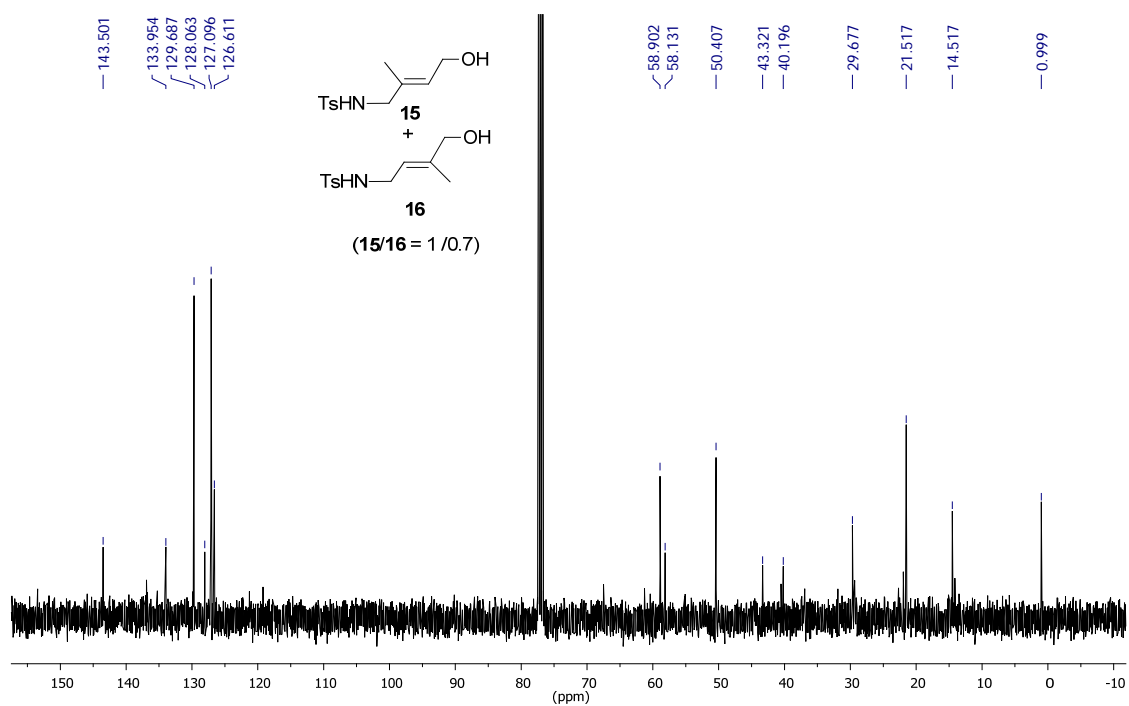

**<sup>1</sup>H NMR spectra of 2-(hydroxybenzyl)-cyclohex-3-enol (4) in CDCl<sub>3</sub>**

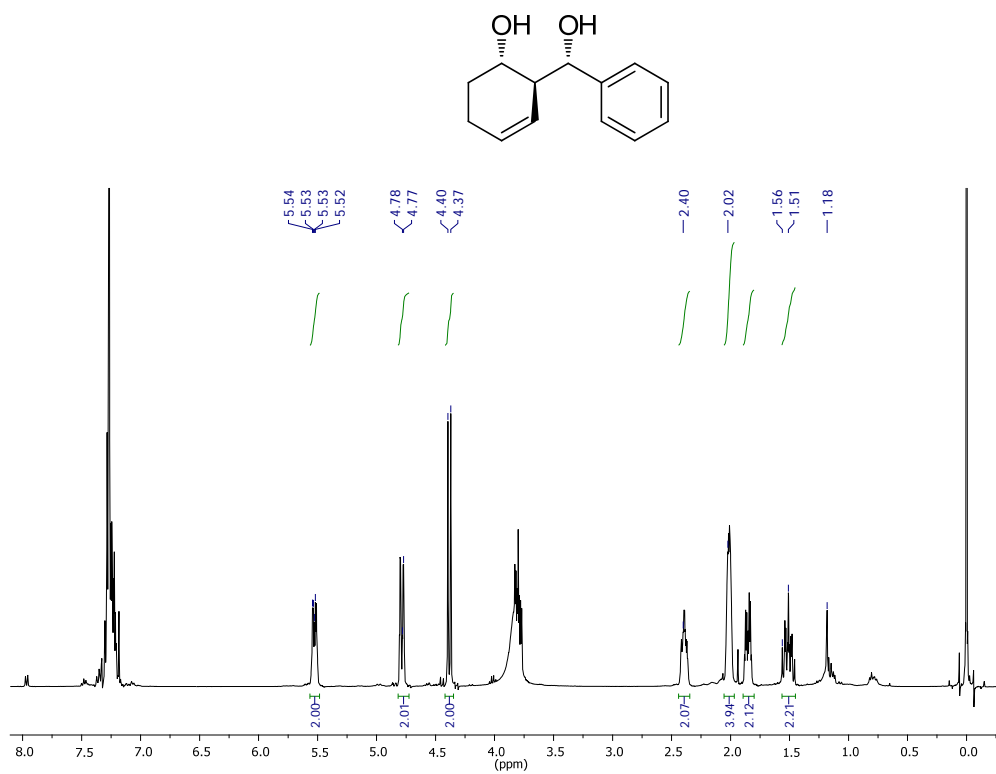

**<sup>13</sup>C NMR spectra of 2-(hydroxybenzyl)-cyclohex-3-enol (4) in CDCl<sub>3</sub>**

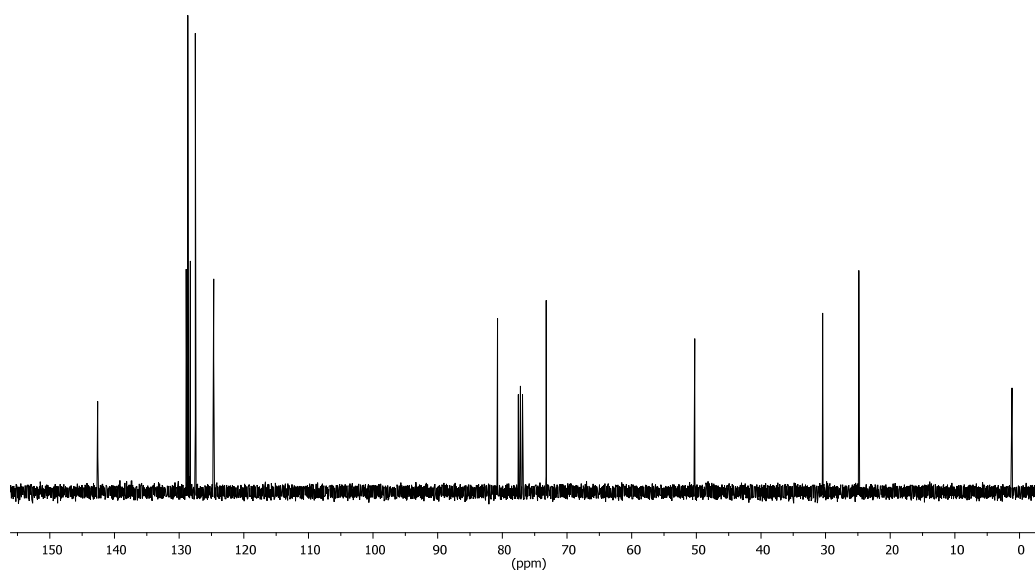

<sup>1</sup>H NMR spectra of 4-hydroxy-cyclohex-2-enyl-phenyl-methanol (6) in CDCl<sub>3</sub>

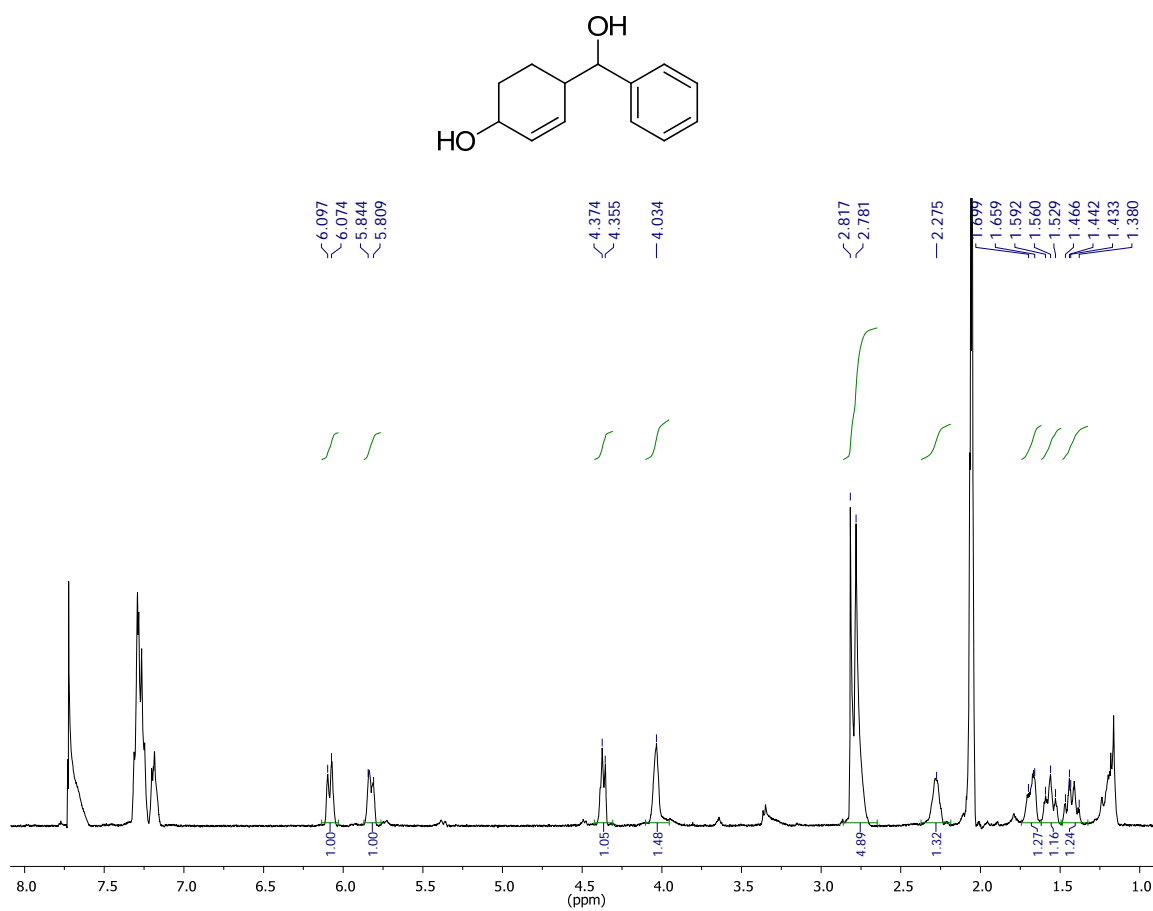



## 6. Data of crystal and structure refinement for 2-(hydroxy(phenyl)methyl)cyclohex-3-enol (6)

The data at the Cambridge Crystallographic Data Centre have been assigned the following deposition numbers.

CCDC 947875

-----  
Summary of Data CCDC 947875  
-----

Compound Name:

Formula: C<sub>13</sub> H<sub>16</sub> O<sub>2</sub>

Unit Cell Parameters: a 9.1921(13) b 14.0304(18) c 9.0659(13) P21/c  
-----

Table 1. Crystal data and structure refinement for mo\_GL60\_BA\_P21c.

|                        |                                                |                   |
|------------------------|------------------------------------------------|-------------------|
| Identification code    | mo_GL60_BA_P21c                                |                   |
| Empirical formula      | C <sub>13</sub> H <sub>16</sub> O <sub>2</sub> |                   |
| Formula weight         | 204.26                                         |                   |
| Temperature            | 101(2) K                                       |                   |
| Wavelength             | 0.71073 Å                                      |                   |
| Crystal system         | Monoclinic                                     |                   |
| Space group            | P2(1)/c                                        |                   |
| Unit cell dimensions   | a = 9.1921(13) Å                               | α = 90.00 °.      |
|                        | b = 14.0304(18) Å                              | β = 114.463(4) °. |
|                        | c = 9.0659(13) Å                               | γ = 90.00 °.      |
| Volume                 | 1064.3(3) Å <sup>3</sup>                       |                   |
| Z                      | 4                                              |                   |
| Density (calculated)   | 1.275 Mg/m <sup>3</sup>                        |                   |
| Absorption coefficient | 0.084 mm <sup>-1</sup>                         |                   |

|                                   |                                             |
|-----------------------------------|---------------------------------------------|
| F(000)                            | 440                                         |
| Crystal size                      | 0.12 x 0.05 x 0.01 mm <sup>3</sup>          |
| Theta range for data collection   | 2.43 to 28.36 °.                            |
| Index ranges                      | -12 ≤h≤10 , -12 ≤k≤18 , -11 ≤l≤12           |
| Reflections collected             | 2654                                        |
| Independent reflections           | 2033 [R(int) = 0.0359 ]                     |
| Completeness to theta =28.36 °    | 0.996 %                                     |
| Absorption correction             | Empirical                                   |
| Max. and min. transmission        | 0.9992 and 0.9899                           |
| Refinement method                 | Full-matrix least-squares on F <sup>2</sup> |
| Data / restraints / parameters    | 2654 / 0 / 138                              |
| Goodness-of-fit on F <sup>2</sup> | 1.041                                       |
| Final R indices [I>2sigma(I)]     | R1 = 0.0432 , wR2 = 0.1009                  |
| R indices (all data)              | R1 = 0.0627 , wR2 = 0.1105                  |
| Largest diff. peak and hole       | 0.401 and -0.227 e.Å <sup>-3</sup>          |

Table 2. Bond lengths [Å] and angles [°] for mo\_GL60\_BA\_P21c.

Bond lengths----

|        |            |
|--------|------------|
| C1-O1  | 1.4342(15) |
| C1-C2  | 1.5146(18) |
| C1-C8  | 1.5441(17) |
| C2-C7  | 1.390(2)   |
| C2-C3  | 1.3929(19) |
| C3-C4  | 1.3899(19) |
| C4-C5  | 1.383(2)   |
| C5-C6  | 1.385(2)   |
| C6-C7  | 1.393(2)   |
| C8-C9  | 1.5125(18) |
| C8-C13 | 1.5308(18) |
| C9-C10 | 1.326(2)   |

|             |            |
|-------------|------------|
| C10-C11     | 1.5033(19) |
| C11-O2      | 1.4361(16) |
| C11-C12     | 1.5190(18) |
| C12-C13     | 1.5177(19) |
| Angles----- |            |
| O1-C1-C2    | 111.09(11) |
| O1-C1-C8    | 106.19(10) |
| C2-C1-C8    | 113.83(10) |
| C7-C2-C3    | 118.60(12) |
| C7-C2-C1    | 121.23(12) |
| C3-C2-C1    | 120.16(12) |
| C4-C3-C2    | 120.83(13) |
| C5-C4-C3    | 120.21(13) |
| C4-C5-C6    | 119.43(13) |
| C5-C6-C7    | 120.50(14) |
| C2-C7-C6    | 120.41(13) |
| C9-C8-C13   | 110.03(11) |
| C9-C8-C1    | 109.27(10) |
| C13-C8-C1   | 112.94(10) |
| C10-C9-C8   | 123.38(12) |
| C9-C10-C11  | 124.24(12) |
| O2-C11-C10  | 110.53(11) |
| O2-C11-C12  | 108.49(10) |
| C10-C11-C12 | 111.60(11) |
| C13-C12-C11 | 110.13(11) |
| C12-C13-C8  | 112.15(11) |

## 7. Computational details

Molecular structures for all species were optimized without constraints using DFT-based methods as implemented in the Amsterdam Density Functional (ADF v2009.01) package.<sup>[4,5]</sup> A triple- $\xi$  plus polarization Slater basis set was used on all atoms. Relativistic corrections were introduced by scalar-relativistic zero-order regular approximation (ZORA).<sup>[6]</sup> For geometry optimizations we used the local VWN correlation potential<sup>[7]</sup> together with the Becke exchange and the Perdew correlation<sup>[8-10]</sup> (BP86) generalized gradient (GGA) corrections. Stationary points in the potential energy hypersurface were characterized either as minima or transition states by means of harmonic vibrational frequency calculations. Solvent effects were introduced by using the continuous solvent model COSMO.<sup>[11]</sup> Single-point energy evaluations at the meta-hybrid M06<sup>[12]</sup> level were performed self-consistently.

## 8. Computed data for the involved species in the conjugate attack

Relative energy barriers for the substrates in different conformations, considering the transition states that come from the most stable species and the addition in *syn* or *anti* in relation to the epoxy/aziridine group. In the figures, the shown energies are in kcal/mol and computed at BP86 level.

### Substrate 1

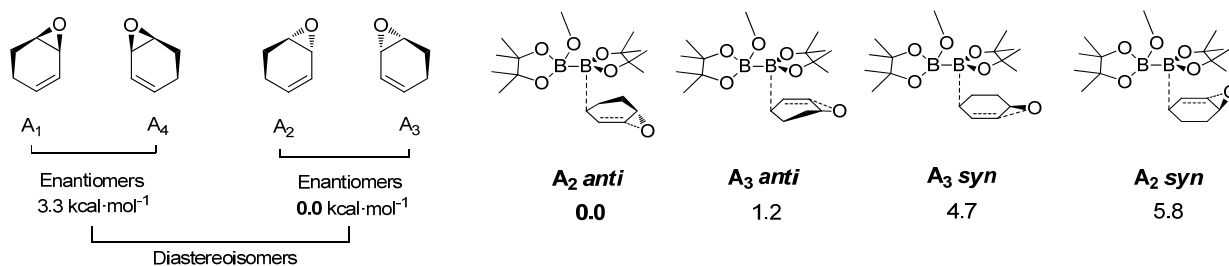

### Transition State

| Substrate          | BP86                |                     |                                             |                                             | M06                 |                     |                                             |                                             |
|--------------------|---------------------|---------------------|---------------------------------------------|---------------------------------------------|---------------------|---------------------|---------------------------------------------|---------------------------------------------|
|                    | $\Delta E^\ddagger$ | $\Delta G^\ddagger$ | $\Delta G^\ddagger + \Delta G_{\text{THF}}$ | $\Delta E^\ddagger + \Delta G_{\text{THF}}$ | $\Delta E^\ddagger$ | $\Delta G^\ddagger$ | $\Delta G^\ddagger + \Delta G_{\text{THF}}$ | $\Delta E^\ddagger + \Delta G_{\text{THF}}$ |
| $A_2 \text{ anti}$ | 21.9                | 35.7                | 49.8                                        | 47.1                                        | 20.4                | 34.2                | 48.3                                        | 34.5                                        |
| $A_3 \text{ anti}$ | 23.1                | 36.1                | 43.9                                        | 43.5                                        | 20.4                | 33.4                | 41.2                                        | 28.2                                        |
| $A_2 \text{ syn}$  | 27.7                | 40.0                | 52.0                                        | 49.3                                        | 27.9                | 40.1                | 52.2                                        | 39.9                                        |
| $A_3 \text{ syn}$  | 26.5                | 40.1                | 54.4                                        | 51.2                                        | 25.4                | 39.0                | 53.3                                        | 39.7                                        |

### Intermediate

| Substrate          | BP86       |            |                                    |                                    | M06        |            |                                    |                                    |
|--------------------|------------|------------|------------------------------------|------------------------------------|------------|------------|------------------------------------|------------------------------------|
|                    | $\Delta E$ | $\Delta G$ | $\Delta G + \Delta G_{\text{THF}}$ | $\Delta E + \Delta G_{\text{THF}}$ | $\Delta E$ | $\Delta G$ | $\Delta G + \Delta G_{\text{THF}}$ | $\Delta E + \Delta G_{\text{THF}}$ |
| $A_2 \text{ anti}$ | -28.7      | -29.4      | -48.4                              | -44.3                              | -30.8      | -31.4      | -50.4                              | -49.8                              |
| $A_3 \text{ anti}$ | -28.7      | -29.4      | -48.4                              | -44.3                              | -30.8      | -31.4      | -50.4                              | -49.8                              |
| $A_2 \text{ syn}$  | -27.8      | -28.9      | -47.9                              | -46.8                              | -30.6      | -31.8      | -50.8                              | -49.7                              |
| $A_3 \text{ syn}$  | -27.8      | -28.9      | -47.9                              | -46.8                              | -30.6      | -31.8      | -50.8                              | -49.7                              |

**Substrate 7**

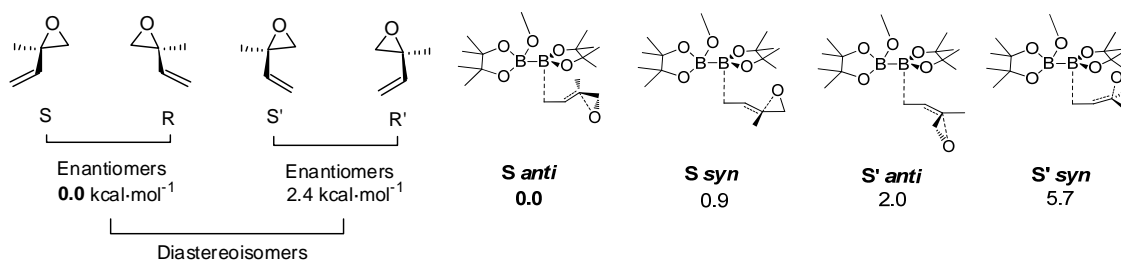

**Transition State**

| Substrate | BP86                |                     |                                             |                                             | M06                 |                     |                                             |                                             |
|-----------|---------------------|---------------------|---------------------------------------------|---------------------------------------------|---------------------|---------------------|---------------------------------------------|---------------------------------------------|
|           | $\Delta E^\ddagger$ | $\Delta G^\ddagger$ | $\Delta G^\ddagger + \Delta G_{\text{THF}}$ | $\Delta E^\ddagger + \Delta G_{\text{THF}}$ | $\Delta E^\ddagger$ | $\Delta G^\ddagger$ | $\Delta G^\ddagger + \Delta G_{\text{THF}}$ | $\Delta E^\ddagger + \Delta G_{\text{THF}}$ |
| S anti    | 17.3                | 31.0                | 43.2                                        | 41.1                                        | 16.1                | 29.8                | 42.0                                        | 28.3                                        |
| S' anti   | 19.3                | 32.8                | 44.7                                        | 39.3                                        | 16.1                | 29.6                | 41.5                                        | 28.0                                        |
| S syn     | 18.2                | 30.7                | 42.7                                        | 40.2                                        | 23.0                | 35.5                | 47.5                                        | 35.0                                        |
| S' syn    | 23.0                | 36.6                | 48.3                                        | 42.5                                        | 23.0                | 36.6                | 48.4                                        | 34.8                                        |

**Intermediate**

| Substrate | BP86       |            |                                    |                                    | M06        |            |                                    |                                    |
|-----------|------------|------------|------------------------------------|------------------------------------|------------|------------|------------------------------------|------------------------------------|
|           | $\Delta E$ | $\Delta G$ | $\Delta G + \Delta G_{\text{THF}}$ | $\Delta E + \Delta G_{\text{THF}}$ | $\Delta E$ | $\Delta G$ | $\Delta G + \Delta G_{\text{THF}}$ | $\Delta E + \Delta G_{\text{THF}}$ |
| S anti    | -30.3      | -31.5      | -54.0                              | -50.1                              | -30.7      | -31.9      | -54.5                              | -53.3                              |
| S' anti   | -29.4      | -29.4      | -50.9                              | -50.3                              | -31.1      | -31.1      | -52.6                              | -52.6                              |
| S syn     | -30.3      | -31.5      | -54.0                              | -52.8                              | -30.7      | -31.9      | -54.5                              | -53.3                              |
| S' syn    | -29.4      | -29.4      | -50.9                              | -50.3                              | -31.1      | -31.1      | -52.6                              | -52.6                              |

**Substrate 10**

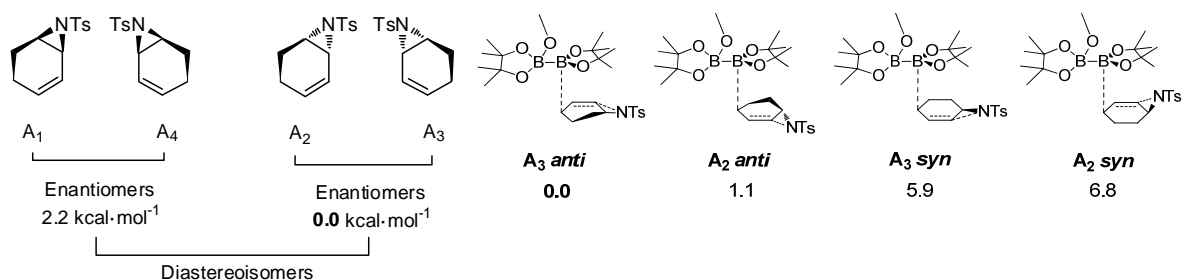

**Transition State**

| Substrate          | BP86                |                     |                                             |                                             | M06                 |                     |                                             |                                             |
|--------------------|---------------------|---------------------|---------------------------------------------|---------------------------------------------|---------------------|---------------------|---------------------------------------------|---------------------------------------------|
|                    | $\Delta E^\ddagger$ | $\Delta G^\ddagger$ | $\Delta G^\ddagger + \Delta G_{\text{THF}}$ | $\Delta E^\ddagger + \Delta G_{\text{THF}}$ | $\Delta E^\ddagger$ | $\Delta G^\ddagger$ | $\Delta G^\ddagger + \Delta G_{\text{THF}}$ | $\Delta E^\ddagger + \Delta G_{\text{THF}}$ |
| $A_2 \text{ anti}$ | 13.3                | 29.0                | 41.9                                        | 41.1                                        | 12.2                | 27.9                | 40.7                                        | 25.0                                        |
| $A_3 \text{ anti}$ | 11.2                | 26.7                | 39.0                                        | 38.2                                        | 11.6                | 27.1                | 39.4                                        | 23.9                                        |
| $A_2 \text{ syn}$  | 17.3                | 33.0                | 48.1                                        | 46.4                                        | 18.9                | 34.6                | 49.7                                        | 34.1                                        |
| $A_3 \text{ syn}$  | 18.0                | 35.6                | 50.8                                        | 47.2                                        | 17.7                | 35.3                | 50.4                                        | 32.8                                        |

**Intermediate**

| Substrate          | BP86       |            |                                    |                                    | M06        |            |                                    |                                    |
|--------------------|------------|------------|------------------------------------|------------------------------------|------------|------------|------------------------------------|------------------------------------|
|                    | $\Delta E$ | $\Delta G$ | $\Delta G + \Delta G_{\text{THF}}$ | $\Delta E + \Delta G_{\text{THF}}$ | $\Delta E$ | $\Delta G$ | $\Delta G + \Delta G_{\text{THF}}$ | $\Delta E + \Delta G_{\text{THF}}$ |
| $A_2 \text{ anti}$ | -56.5      | -54.4      | -59.2                              | -56.9                              | -61.0      | -58.9      | -63.7                              | -65.8                              |
| $A_3 \text{ anti}$ | -56.5      | -54.4      | -59.2                              | -56.9                              | -61.0      | -58.9      | -63.7                              | -65.8                              |
| $A_2 \text{ syn}$  | -50.6      | -47.6      | -50.7                              | -53.7                              | -55.2      | -52.2      | -49.2                              | -58.3                              |
| $A_3 \text{ syn}$  | -50.6      | -47.6      | -50.7                              | -53.7                              | -55.2      | -52.2      | -49.2                              | -58.3                              |

### Substrate 11

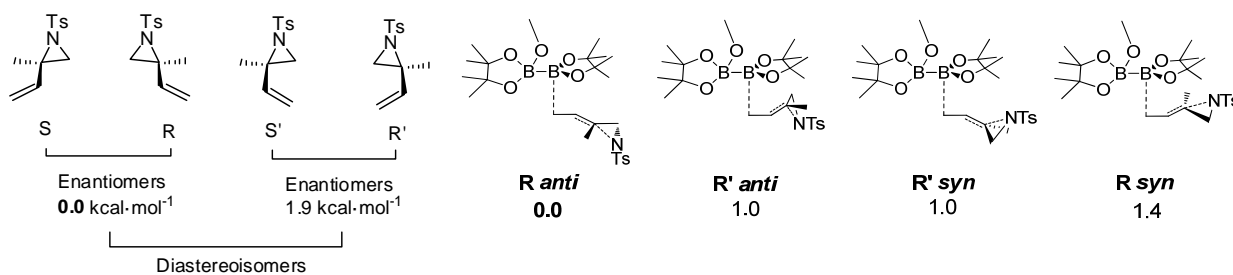

### Transition State

| Substrate | BP86                |                     |                                             |                                             | M06                 |                     |                                             |                                             |
|-----------|---------------------|---------------------|---------------------------------------------|---------------------------------------------|---------------------|---------------------|---------------------------------------------|---------------------------------------------|
|           | $\Delta E^\ddagger$ | $\Delta G^\ddagger$ | $\Delta G^\ddagger + \Delta G_{\text{THF}}$ | $\Delta E^\ddagger + \Delta G_{\text{THF}}$ | $\Delta E^\ddagger$ | $\Delta G^\ddagger$ | $\Delta G^\ddagger + \Delta G_{\text{THF}}$ | $\Delta E^\ddagger + \Delta G_{\text{THF}}$ |
| R' anti   | 9.9                 | 26.2                | 29.3                                        | 34.1                                        | 12.9                | 29.3                | 32.4                                        | 16.0                                        |
| R anti    | 8.9                 | 25.3                | 36.9                                        | 36.2                                        | 10.8                | 27.1                | 38.8                                        | 22.5                                        |
| R' syn    | 9.9                 | 26.2                | 29.3                                        | 34.1                                        | 15.9                | 32.3                | 35.3                                        | 19.0                                        |
| R syn     | 10.3                | 24.1                | 35.8                                        | 33.6                                        | 14.6                | 28.4                | 40.0                                        | 26.3                                        |

### Intermediate

| Substrate | BP86       |            |                                    |                                    | M06        |            |                                    |                                    |
|-----------|------------|------------|------------------------------------|------------------------------------|------------|------------|------------------------------------|------------------------------------|
|           | $\Delta E$ | $\Delta G$ | $\Delta G + \Delta G_{\text{THF}}$ | $\Delta E + \Delta G_{\text{THF}}$ | $\Delta E$ | $\Delta G$ | $\Delta G + \Delta G_{\text{THF}}$ | $\Delta E + \Delta G_{\text{THF}}$ |
| R' anti   | -65.1      | -62.7      | -68.9                              | -67.3                              | -65.1      | -62.8      | -69.0                              | -71.4                              |
| R anti    | -59.4      | -56.2      | -62.9                              | -60.9                              | -59.6      | -56.4      | -63.0                              | -66.3                              |
| R' syn    | -65.1      | -62.7      | -68.9                              | -67.3                              | -65.1      | -62.8      | -69.0                              | -71.4                              |
| R syn     | -59.4      | -56.2      | -62.9                              | -60.9                              | -59.6      | -56.4      | -63.0                              | -66.3                              |



**Substrate 12**

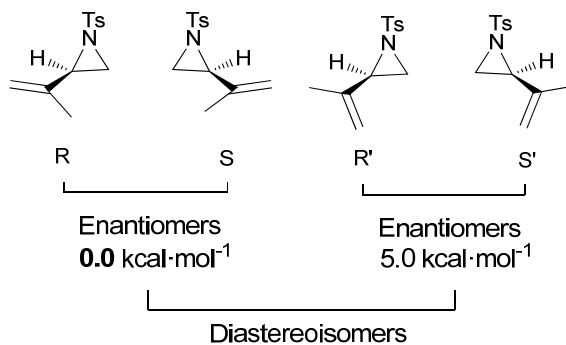

**Transition State**

| Substrate | BP86                |                     |                                             |                                             | M06                 |                     |                                             |                                             |
|-----------|---------------------|---------------------|---------------------------------------------|---------------------------------------------|---------------------|---------------------|---------------------------------------------|---------------------------------------------|
|           | $\Delta E^\ddagger$ | $\Delta G^\ddagger$ | $\Delta G^\ddagger + \Delta G_{\text{THF}}$ | $\Delta E^\ddagger + \Delta G_{\text{THF}}$ | $\Delta E^\ddagger$ | $\Delta G^\ddagger$ | $\Delta G^\ddagger + \Delta G_{\text{THF}}$ | $\Delta E^\ddagger + \Delta G_{\text{THF}}$ |
| R' anti   | 10.2                | 27.0                | 38.4                                        | 38.0                                        | 14.3                | 31.0                | 42.4                                        | 25.6                                        |
| R anti    | 12.7                | 29.4                | 40.7                                        | 40.0                                        | 17.0                | 33.7                | 45.0                                        | 28.3                                        |
| R' syn    | 12.7                | 28.0                | 37.7                                        | 38.8                                        | 17.8                | 33.2                | 42.8                                        | 27.5                                        |
| R syn     | 16.3                | 33.1                | 45.1                                        | 44.3                                        | 20.6                | 37.3                | 49.4                                        | 32.6                                        |

**Intermediate**

| Substrate | BP86       |            |                                    |                                    | M06        |            |                                    |                                    |
|-----------|------------|------------|------------------------------------|------------------------------------|------------|------------|------------------------------------|------------------------------------|
|           | $\Delta E$ | $\Delta G$ | $\Delta G + \Delta G_{\text{THF}}$ | $\Delta E + \Delta G_{\text{THF}}$ | $\Delta E$ | $\Delta G$ | $\Delta G + \Delta G_{\text{THF}}$ | $\Delta E + \Delta G_{\text{THF}}$ |
| R' anti   | -64.2      | -61.7      | -70.2                              | -67.0                              | -64.5      | -62.0      | -70.5                              | -73.0                              |
| R anti    | -55.8      | -52.0      | -60.9                              | -58.5                              | -56.5      | -52.7      | -61.6                              | -65.4                              |
| R' syn    | -64.2      | -61.7      | -70.2                              | -67.0                              | -64.5      | -62.0      | -70.5                              | -73.0                              |
| R syn     | -55.8      | -52.0      | -60.9                              | -58.5                              | -56.5      | -52.7      | -61.6                              | -65.4                              |

In the left table are shown bond distances (Å) and angles (°) between atoms involved in the reaction for the substrate,  $\text{MeO}^- \rightarrow \text{bis}(\text{pinacolato})\text{diboron}$ , transition state. In the right table is collected the “Voronoi charges” distribution for the atoms involved of the same species of the catalytic cycle.

### Substrate 1

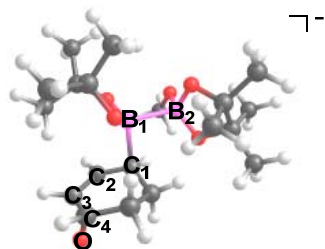

| Distances                           | Substrate | $[\text{B}_2\text{pin}_2 \cdot \text{MeO}]^-$ | T.S.  | Intermediate | Atoms                | Substrate | $[\text{B}_2\text{pin}_2 \cdot \text{MeO}]^-$ | T.S.  | Intermediate |
|-------------------------------------|-----------|-----------------------------------------------|-------|--------------|----------------------|-----------|-----------------------------------------------|-------|--------------|
| $d(\text{B}_1\text{-B}_2)$          | ----      | 1.755                                         | 2.096 | ----         | <b>B<sub>1</sub></b> | ----      | 0.09                                          | 0.10  | 0.21         |
| $d(\text{B}_1\text{-C}_1)$          | ----      | ----                                          | 1.988 | 1.577        | <b>B<sub>2</sub></b> | ----      | 0.07                                          | 0.16  | ----         |
| $d(\text{C}_1\text{-C}_2)$          | 1.344     | ----                                          | 1.417 | 1.521        | <b>C<sub>1</sub></b> | -0.05     | ----                                          | -0.05 | -0.15        |
| $d(\text{C}_2\text{-C}_3)$          | 1.483     | ----                                          | 1.438 | 1.348        | <b>C<sub>2</sub></b> | -0.09     | ----                                          | -0.14 | -0.08        |
| $d(\text{C}_3\text{-C}_4)$          | 1.480     | ----                                          | 1.476 | 1.535        | <b>C<sub>3</sub></b> | 0.00      | ----                                          | 0.01  | -0.08        |
| $d(\text{C}_3\text{-O})$            | 1.475     | ----                                          | 1.624 | 2.375        | <b>C<sub>4</sub></b> | 0.00      | ----                                          | 0.00  | 0.00         |
| $d(\text{C}_4\text{-O})$            | 1.444     | ----                                          | 1.529 | 1.351        | <b>O</b>             | -0.24     | ----                                          | -0.36 | -0.74        |
| $a(\text{C}_3\text{-C}_4\text{-O})$ | 60.6      | ----                                          | 67.9  | 110.6        |                      |           |                                               |       |              |

### Substrate 7

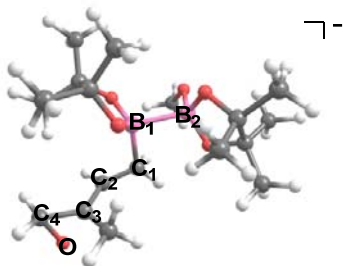

| Distances                           | Substrate | $[\text{B}_2\text{pin}_2 \cdot \text{MeO}]^-$ | T.S.  | Intermediate | Atoms                | Substrate | $[\text{B}_2\text{pin}_2 \cdot \text{MeO}]^-$ | T.S.  | Intermediate |
|-------------------------------------|-----------|-----------------------------------------------|-------|--------------|----------------------|-----------|-----------------------------------------------|-------|--------------|
| $d(\text{B}_1\text{-B}_2)$          | ----      | 1.755                                         | 1.955 | ----         | <b>B<sub>1</sub></b> | ----      | 0.09                                          | 0.09  | 0.20         |
| $d(\text{B}_1\text{-C}_1)$          | ----      | ----                                          | 2.144 | 1.561        | <b>B<sub>2</sub></b> | ----      | 0.07                                          | 0.16  | ----         |
| $d(\text{C}_1\text{-C}_2)$          | 1.339     | ----                                          | 1.400 | 1.527        | <b>C<sub>1</sub></b> | -0.05     | ----                                          | -0.10 | -0.18        |
| $d(\text{C}_2\text{-C}_3)$          | 1.486     | ----                                          | 1.418 | 1.353        | <b>C<sub>2</sub></b> | -0.06     | ----                                          | -0.15 | -0.10        |
| $d(\text{C}_3\text{-C}_4)$          | 1.485     | ----                                          | 1.477 | 1.544        | <b>C<sub>3</sub></b> | 0.03      | ----                                          | 0.04  | -0.06        |
| $d(\text{C}_3\text{-O})$            | 1.472     | ----                                          | 1.865 | 2.400        | <b>C<sub>4</sub></b> | 0.02      | ----                                          | -0.03 | 0.00         |
| $d(\text{C}_4\text{-O})$            | 1.438     | ----                                          | 1.396 | 1.347        | <b>O</b>             | -0.25     | ----                                          | -0.33 | -0.74        |
| $a(\text{C}_3\text{-C}_4\text{-O})$ | 60.4      | ----                                          | 80.9  | 112.1        |                      |           |                                               |       |              |

### Substrate 10

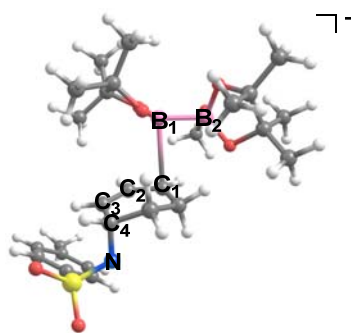

| Distances                            | Substrate | [B <sub>2</sub> pin <sub>2</sub> ·MeO] <sup>-</sup> | T.S.  | Intermediate |
|--------------------------------------|-----------|-----------------------------------------------------|-------|--------------|
| d(B <sub>1</sub> -B <sub>2</sub> )   | ----      | 1.755                                               | 1.851 | ----         |
| d(B <sub>1</sub> -C <sub>1</sub> )   | ----      | ----                                                | 2.853 | 1.576        |
| d(C <sub>1</sub> -C <sub>2</sub> )   | 1.343     | ----                                                | 1.384 | 1.519        |
| d(C <sub>2</sub> -C <sub>3</sub> )   | 1.483     | ----                                                | 1.399 | 1.343        |
| d(C <sub>3</sub> -C <sub>4</sub> )   | 1.495     | ----                                                | 1.485 | 1.519        |
| d(C <sub>3</sub> -N)                 | 1.516     | ----                                                | 2.118 | 2.507        |
| d(C <sub>4</sub> -N)                 | 1.490     | ----                                                | 1.418 | 1.475        |
| a(C <sub>3</sub> -C <sub>4</sub> -N) | 61.1      | ----                                                | 91.1  | 113.7        |

| Atoms          | Substrate | [B <sub>2</sub> pin <sub>2</sub> ·MeO] <sup>-</sup> | T.S.  | Intermediate |
|----------------|-----------|-----------------------------------------------------|-------|--------------|
| B <sub>1</sub> | ----      | 0.09                                                | 0.09  | 0.20         |
| B <sub>2</sub> | ----      | 0.07                                                | 0.10  | ----         |
| C <sub>1</sub> | -0.06     | ----                                                | 0.06  | -0.15        |
| C <sub>2</sub> | -0.08     | ----                                                | -0.09 | -0.07        |
| C <sub>3</sub> | 0.02      | ----                                                | 0.04  | -0.08        |
| C <sub>4</sub> | 0.04      | ----                                                | -0.03 | -0.01        |
| N              | -0.17     | ----                                                | -0.36 | -0.41        |

### Substrate 11

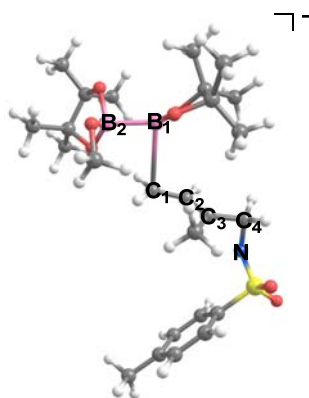

| Distances                            | Substrate | [B <sub>2</sub> pin <sub>2</sub> ·MeO] <sup>-</sup> | T.S.  | Intermediate |
|--------------------------------------|-----------|-----------------------------------------------------|-------|--------------|
| d(B <sub>1</sub> -B <sub>2</sub> )   | ----      | 1.755                                               | 1.857 | ----         |
| d(B <sub>1</sub> -C <sub>1</sub> )   | ----      | ----                                                | 2.647 | 1.570        |
| d(C <sub>1</sub> -C <sub>2</sub> )   | 1.339     | ----                                                | 1.380 | 1.522        |
| d(C <sub>2</sub> -C <sub>3</sub> )   | 1.489     | ----                                                | 1.410 | 1.349        |
| d(C <sub>3</sub> -C <sub>4</sub> )   | 1.506     | ----                                                | 1.490 | 1.529        |
| d(C <sub>3</sub> -N)                 | 1.519     | ----                                                | 2.207 | 2.478        |
| d(C <sub>4</sub> -N)                 | 1.473     | ----                                                | 1.481 | 1.458        |
| a(C <sub>3</sub> -C <sub>4</sub> -N) | 61.3      | ----                                                | 96.0  | 112.1        |

| Atoms          | Substrate | [B <sub>2</sub> pin <sub>2</sub> ·MeO] <sup>-</sup> | T.S.  | Intermediate |
|----------------|-----------|-----------------------------------------------------|-------|--------------|
| B <sub>1</sub> | ----      | 0.09                                                | 0.01  | 0.20         |
| B <sub>2</sub> | ----      | 0.07                                                | 0.10  | ----         |
| C <sub>1</sub> | -0.10     | ----                                                | 0.02  | -0.18        |
| C <sub>2</sub> | -0.07     | ----                                                | -0.09 | -0.09        |
| C <sub>3</sub> | 0.01      | ----                                                | 0.10  | -0.05        |
| C <sub>4</sub> | -0.05     | ----                                                | -0.04 | -0.04        |
| N              | -0.18     | ----                                                | -0.37 | -0.43        |

### 9. Computed data for involved species in the direct attack

The next table shows the barriers for the direct addition to the epoxy/aziridine functional groups.

| Substrate                                                                                                  | Transition State    |                     |                                             |                                             |                     |                     |                                             |                                             |
|------------------------------------------------------------------------------------------------------------|---------------------|---------------------|---------------------------------------------|---------------------------------------------|---------------------|---------------------|---------------------------------------------|---------------------------------------------|
|                                                                                                            | BP86                |                     |                                             |                                             | M06                 |                     |                                             |                                             |
|                                                                                                            | $\Delta E^\ddagger$ | $\Delta G^\ddagger$ | $\Delta G^\ddagger + \Delta G_{\text{THF}}$ | $\Delta E^\ddagger + \Delta G_{\text{THF}}$ | $\Delta E^\ddagger$ | $\Delta G^\ddagger$ | $\Delta G^\ddagger + \Delta G_{\text{THF}}$ | $\Delta E^\ddagger + \Delta G_{\text{THF}}$ |
|  A <sub>2</sub> anti<br>4 | 23.0                | 36.6                | 41.7                                        | 41.9                                        | 21.8                | 35.4                | 40.6                                        | 27.0                                        |
|  S anti<br>7              | 31.1                | 45.3                | 50.2                                        | 50.4                                        | 29.3                | 43.4                | 48.3                                        | 34.2                                        |
|  S' anti<br>7             | 33.6                | 47.5                | 54.5                                        | 50.8                                        | 28.5                | 42.4                | 49.4                                        | 35.5                                        |

| Substrate                                                                                                  | Intermediate |            |                                    |                                    |            |            |                                    |                                    |
|------------------------------------------------------------------------------------------------------------|--------------|------------|------------------------------------|------------------------------------|------------|------------|------------------------------------|------------------------------------|
|                                                                                                            | BP86         |            |                                    |                                    | M06        |            |                                    |                                    |
|                                                                                                            | $\Delta E$   | $\Delta G$ | $\Delta G + \Delta G_{\text{THF}}$ | $\Delta E + \Delta G_{\text{THF}}$ | $\Delta E$ | $\Delta G$ | $\Delta G + \Delta G_{\text{THF}}$ | $\Delta E + \Delta G_{\text{THF}}$ |
|  A <sub>2</sub> anti<br>4 | -32.3        | -33.1      | -49.3                              | -45.7                              | -34.1      | -34.9      | -51.1                              | -50.3                              |
|  S anti<br>7             | -27.7        | -28.4      | -42.9                              | -39.9                              | -30.6      | -31.3      | -45.8                              | -45.2                              |
|  S' anti<br>7           | -26.8        | -27.5      | -41.5                              | -41.9                              | -33.6      | -34.3      | -48.3                              | -47.7                              |

| Substrate                                                                                                     | Transition State    |                     |                                             |                                             |                     |                     |                                             |                                             |
|---------------------------------------------------------------------------------------------------------------|---------------------|---------------------|---------------------------------------------|---------------------------------------------|---------------------|---------------------|---------------------------------------------|---------------------------------------------|
|                                                                                                               | BP86                |                     |                                             |                                             | M06                 |                     |                                             |                                             |
|                                                                                                               | $\Delta E^\ddagger$ | $\Delta G^\ddagger$ | $\Delta G^\ddagger + \Delta G_{\text{THF}}$ | $\Delta E^\ddagger + \Delta G_{\text{THF}}$ | $\Delta E^\ddagger$ | $\Delta G^\ddagger$ | $\Delta G^\ddagger + \Delta G_{\text{THF}}$ | $\Delta E^\ddagger + \Delta G_{\text{THF}}$ |
|  A <sub>2</sub> anti<br>10 | 15.5                | 29.4                | 39.0                                        | 38.9                                        | 13.3                | 27.1                | 36.7                                        | 22.9                                        |
|  R anti<br>11              | 18.3                | 33.0                | 42.3                                        | 42.5                                        | 17.9                | 32.6                | 41.9                                        | 27.3                                        |
|  R' anti<br>11             | 17.1                | 32.4                | 43.3                                        | 43.1                                        | 16.4                | 31.7                | 42.6                                        | 27.3                                        |
|  R anti<br>12              | 21.1                | 37.4                | 46.5                                        | 46.9                                        | 20.6                | 36.8                | 46.0                                        | 29.7                                        |
|  R' anti<br>12             | 17.0                | 32.1                | 43.1                                        | 42.9                                        | 16.4                | 31.5                | 42.4                                        | 27.4                                        |

| Substrate                                                                                                       | Intermediate |            |                                    |                                    |            |            |                                    |                                    |
|-----------------------------------------------------------------------------------------------------------------|--------------|------------|------------------------------------|------------------------------------|------------|------------|------------------------------------|------------------------------------|
|                                                                                                                 | BP86         |            |                                    |                                    | M06        |            |                                    |                                    |
|                                                                                                                 | $\Delta E$   | $\Delta G$ | $\Delta G + \Delta G_{\text{THF}}$ | $\Delta E + \Delta G_{\text{THF}}$ | $\Delta E$ | $\Delta G$ | $\Delta G + \Delta G_{\text{THF}}$ | $\Delta E + \Delta G_{\text{THF}}$ |
| 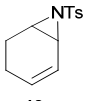 <b>10</b> A <sub>2</sub> anti | -56.2        | -55.2      | -57.9                              | -56.1                              | -61.8      | -60.8      | -63.5                              | -64.4                              |
|  <b>11</b> R anti              | -54.5        | -53.4      | -59.7                              | -57.2                              | -59.2      | -58.0      | -64.3                              | -65.5                              |
|  <b>11</b> R' anti             | -61.5        | -57.9      | -64.5                              | -62.5                              | -61.2      | -57.6      | -64.2                              | -67.8                              |
|  <b>12</b> R anti              | -55.9        | -53.3      | -56.9                              | -54.8                              | -60.2      | -57.6      | -61.1                              | -63.7                              |
|  <b>12</b> R' anti             | -60.8        | -59.6      | -62.8                              | -60.8                              | -64.9      | -63.7      | -66.9                              | -68.1                              |

## 10. PKa computation details

PKa values were obtained based on the Born-Haber cycle using the known solvation energy of the proton ( $\Delta G_{\text{S}}^{\circ}(\text{H}^+) = -265.9 \text{ Kcal} \cdot \text{mol}^{-1}$ ).<sup>[13]</sup>

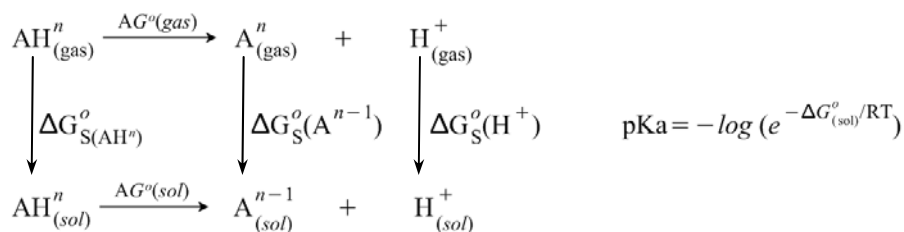

In this particular case, molecular structures of the intermediates, protonated products were calculated without constraints using Gaussian 09,<sup>[14]</sup> Revision A.02, with the hybrid B3LYP<sup>[15]</sup> functional and 6-31+G(d)<sup>[16]</sup> as a basis set. Solvent effects (dimethylsulphoxide, DMSO) were introduced by using the Polarizable Continuum Model (PCM).<sup>[17]</sup>

## 11. Geometries of the involved species

BISPIN

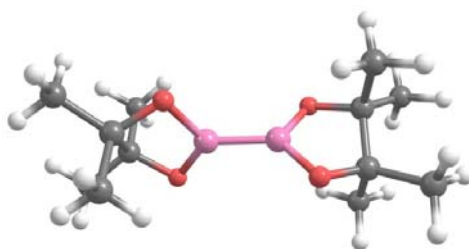

Electronic Energy=-5480.22 kcal/mol

|   |              |             |              |
|---|--------------|-------------|--------------|
| C | -1.980685145 | 0.549557188 | 0.478730531  |
| C | -2.518983842 | 1.369878242 | -0.749971365 |
| C | 3.041309702  | 3.933094723 | -0.470389308 |
| C | 3.416149223  | 2.742753948 | -1.426942132 |
| B | 1.263497081  | 2.484664192 | -0.656902419 |
| B | -0.284488374 | 1.812803190 | -0.427120544 |
| O | 2.102590954  | 2.126258702 | -1.695164658 |
| O | 1.808328805  | 3.443827668 | 0.175971848  |
| O | -1.434599222 | 2.343810088 | -0.980105047 |
| O | -0.518363961 | 0.681157948 | 0.331305143  |
| C | 4.062347767  | 4.236482741 | 0.621102665  |
| H | 5.016431983  | 4.564225542 | 0.180632565  |
| H | 3.685235381  | 5.048209408 | 1.258643463  |
| H | 4.248900014  | 3.361572920 | 1.255497887  |
| C | 2.655808570  | 5.215208897 | -1.214466066 |
| H | 2.216986384  | 5.921980164 | -0.497235213 |
| H | 3.531376927  | 5.690611600 | -1.679808172 |
| H | 1.908617116  | 5.011737386 | -1.993443329 |
| C | 4.031767996  | 3.150060098 | -2.761484117 |
| H | 4.997124085  | 3.655671513 | -2.606085832 |
| H | 4.211637055  | 2.252748474 | -3.369792630 |
| H | 3.370162203  | 3.818738962 | -3.325269894 |
| C | 4.267109618  | 1.662775591 | -0.751966369 |
| H | 4.312050760  | 0.784924120 | -1.410646917 |

|   |              |              |              |
|---|--------------|--------------|--------------|
| H | 5.293238814  | 2.013175586  | -0.569078194 |
| H | 3.825077000  | 1.349861423  | 0.203644752  |
| C | -3.808756788 | 2.144403526  | -0.499957490 |
| H | -4.071400308 | 2.716942718  | -1.400389531 |
| H | -4.638991112 | 1.456080341  | -0.279448232 |
| H | -3.703107004 | 2.848244211  | 0.334407781  |
| C | -2.631645667 | 0.542081186  | -2.033769931 |
| H | -3.463338264 | -0.175222346 | -1.979776425 |
| H | -2.812984286 | 1.221301897  | -2.877740851 |
| H | -1.702428465 | -0.008767209 | -2.232830495 |
| C | -2.333495039 | 1.175369057  | 1.831492617  |
| H | -3.403813286 | 1.067337491  | 2.059354707  |
| H | -1.758091584 | 0.667188363  | 2.617094011  |
| H | -2.073395580 | 2.242294591  | 1.854289313  |
| C | -2.327720745 | -0.935493053 | 0.471468668  |
| H | -1.867756448 | -1.422342424 | 1.342657982  |
| H | -3.417017869 | -1.080466117 | 0.535617803  |
| H | -1.958368079 | -1.433143504 | -0.433309849 |

BISPIN-OME

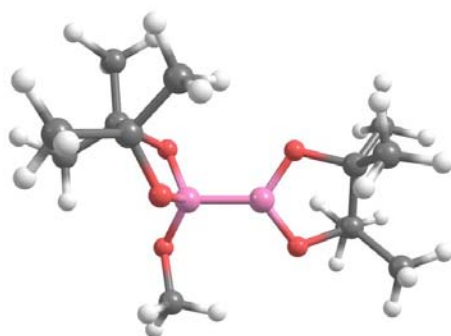

Electronic Energy=-6115.23 kcal/mol

|   |              |              |              |
|---|--------------|--------------|--------------|
| B | -0.862506925 | -0.445600549 | 0.102312124  |
| O | -1.950573999 | -1.146444199 | -0.463893172 |
| O | -1.297035044 | 0.842387980  | 0.480666498  |
| C | -2.622069330 | 1.075993678  | -0.070287271 |
| C | -3.171122471 | -0.381558383 | -0.243887391 |
| C | -3.820357553 | -0.934207501 | 1.033656088  |
| C | -4.102594297 | -0.593317946 | -1.437170414 |
| C | -2.432595486 | 1.809685142  | -1.406715576 |
| C | -3.405856097 | 1.958553008  | 0.901658450  |
| B | 0.790228862  | -1.002404323 | 0.296206800  |
| O | 1.645393955  | -0.545446923 | -0.880476707 |
| O | 1.411248687  | -0.335200216 | 1.475694391  |
| C | 2.580900170  | 0.418804520  | -0.408674313 |
| C | 2.736848514  | 0.048709085  | 1.117640518  |
| C | 1.980648874  | 1.829481909  | -0.595402032 |
| C | 3.870814567  | 0.303295577  | -1.233482530 |
| C | 3.692969170  | -1.144903451 | 1.329673493  |
| C | 3.167681721  | 1.211261102  | 2.022490444  |
| H | -1.851884603 | 2.724702606  | -1.223305591 |
| H | -3.394098692 | 2.089424881  | -1.866363166 |
| H | -3.429363608 | 1.520524051  | 1.907472975  |
| H | -4.441281611 | 2.112558097  | 0.554829241  |
| H | -3.605093522 | -0.337775351 | -2.381291822 |
| H | -5.017159707 | 0.015183551  | -1.340679572 |



|   |              |              |              |
|---|--------------|--------------|--------------|
| H | -3.976090093 | -2.014920192 | 0.907215891  |
| H | -4.792813647 | -0.460398567 | 1.243134280  |
| H | 2.687026257  | 2.633676501  | -0.325937228 |
| H | 1.705462237  | 1.947783185  | -1.654884883 |
| H | 4.655566851  | 0.982511466  | -0.857357210 |
| H | 4.253055891  | -0.726122342 | -1.217448091 |
| H | 4.153752360  | 1.610470819  | 1.728475092  |
| H | 3.239044433  | 0.855224076  | 3.062634840  |
| H | 3.602296952  | -1.473899846 | 2.375862758  |
| H | 3.384900323  | -1.981546817 | 0.690529081  |
| H | -1.864861304 | 1.186776788  | -2.111130439 |
| H | -2.919056236 | 2.942522774  | 0.972653546  |
| H | -4.399624909 | -1.651543475 | -1.485271702 |
| H | -3.156714627 | -0.787209357 | 1.896328514  |
| H | 1.069486304  | 1.927650337  | 0.008963745  |
| H | 3.659549123  | 0.571515075  | -2.281148981 |
| H | 2.429314368  | 2.023887347  | 1.993629950  |
| H | 4.747707233  | -0.884478728 | 1.132090662  |
| O | 0.907221393  | -2.484317829 | 0.460359853  |
| C | 0.546944576  | -3.255816681 | -0.661719434 |
| H | 0.636219696  | -4.327529567 | -0.403781047 |
| H | 1.204647451  | -3.060641575 | -1.533677594 |
| H | -0.496344078 | -3.070219670 | -0.986718071 |

BPIN-OME

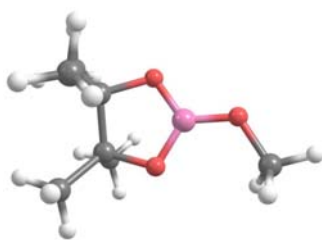

Electronic Energy=-3347.68 kcal/mol

|   |              |              |              |
|---|--------------|--------------|--------------|
| C | 0.065798618  | 0.181820185  | -0.313269554 |
| C | 1.624678614  | 0.153519552  | -0.562367948 |
| B | 0.831647485  | 2.271599590  | -0.830691010 |
| O | -0.308888448 | 1.499846267  | -0.873551796 |
| O | 1.983438498  | 1.585793783  | -0.501150014 |
| C | -0.307406066 | 0.215722291  | 1.172178348  |
| H | -1.382131603 | 0.441507080  | 1.261559524  |
| H | -0.113393211 | -0.762597232 | 1.654008561  |
| H | 0.254061644  | 1.000614302  | 1.710220068  |
| C | -0.725551372 | -0.895970176 | -1.044747318 |
| H | -0.398739746 | -1.904078930 | -0.715562255 |
| H | -1.796848713 | -0.789535921 | -0.807270669 |
| H | -0.601130043 | -0.818438453 | -2.136898153 |
| C | 2.431305226  | -0.585898772 | 0.497497437  |
| H | 2.129284482  | -1.650566166 | 0.540877312  |
| H | 3.501869798  | -0.543586127 | 0.240816458  |
| H | 2.290501554  | -0.137474118 | 1.493639486  |
| C | 1.994304550  | -0.330659174 | -1.968027715 |
| H | 3.064209005  | -0.138482233 | -2.138535544 |
| H | 1.810058120  | -1.415368798 | -2.077958418 |
| H | 1.416937560  | 0.210080866  | -2.740809262 |
| O | 0.866135753  | 3.612527675  | -1.086280661 |
| C | -0.396273568 | 4.244901449  | -1.383877040 |
| H | -1.098408486 | 4.135260565  | -0.536664142 |
| H | -0.194032748 | 5.312617175  | -1.559778758 |
| H | -0.850262520 | 3.801199058  | -2.289792249 |

3,4-EPOXY-1-CYCLOHEXENE A<sub>2</sub> (1)

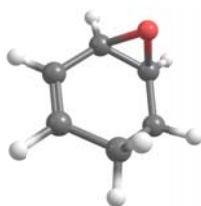

Electronic Energy=-2009.79 kcal/mol

|   |              |              |              |
|---|--------------|--------------|--------------|
| C | -0.517883357 | 0.617142495  | 0.285173334  |
| C | 0.965401199  | 0.377249748  | 0.390343248  |
| C | 1.768789029  | 1.680255429  | 0.586135086  |
| C | 1.132972805  | 2.616037403  | 1.589029285  |
| C | -0.339450033 | 2.594927292  | 1.739591297  |
| C | -1.119892802 | 1.637486411  | 0.919144096  |
| H | 2.800183973  | 1.443294181  | 0.890005021  |
| H | 1.152909217  | -0.288755388 | 1.249172388  |
| H | 1.332340387  | -0.156629507 | -0.499143174 |
| H | -1.114359793 | -0.084078742 | -0.304383472 |
| H | -2.199925112 | 1.785438769  | 0.845967384  |
| H | 1.837301200  | 2.227489613  | -0.370568484 |
| O | 0.549190021  | 2.031371574  | 2.772997610  |
| H | -0.849045677 | 3.503134351  | 2.073468162  |
| H | 1.659571539  | 3.561091341  | 1.770955906  |

3,4-EPOXY-1-CYCLOHEXENE A<sub>3</sub> (1)

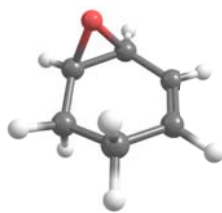

Electronic Energy=-2009.79 kcal/mol

|   |              |              |              |
|---|--------------|--------------|--------------|
| C | -0.506107478 | 0.772273976  | 0.307661892  |
| C | 0.986883102  | 0.583139272  | 0.376457559  |
| C | 1.594489283  | 1.095369150  | 1.699800314  |
| C | 1.031223550  | 2.432682893  | 2.125277476  |
| C | -0.357654066 | 2.769774102  | 1.738754629  |
| C | -1.123662596 | 1.790617129  | 0.929696727  |
| H | 1.246669514  | -0.476483122 | 0.233612386  |
| H | 1.448874891  | 1.130070134  | -0.462136374 |
| H | -1.088861693 | 0.069402421  | -0.293389846 |
| H | -2.205482529 | 1.922435216  | 0.853200173  |
| O | 0.799551801  | 3.417777980  | 1.096266512  |
| H | 2.689960612  | 1.157529965  | 1.609956742  |
| H | 1.381710212  | 0.379988992  | 2.513345163  |
| H | -0.928791516 | 3.458494917  | 2.367559965  |
| H | 1.425360895  | 2.848605066  | 3.060710406  |

TS ANTI A<sub>2</sub>

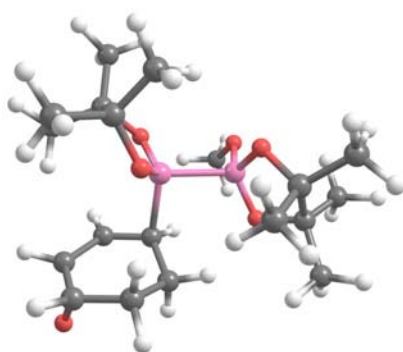

Electronic Energy=-8103.10 kcal/mol

|   |              |              |              |
|---|--------------|--------------|--------------|
| B | -1.113659008 | -1.022245065 | -0.503360628 |
| B | 0.749695959  | -0.081795566 | -0.310627547 |
| C | 0.268855900  | 1.506376976  | -1.404933715 |
| C | 1.554387921  | 2.024085968  | -1.702199807 |
| O | 1.437258521  | 4.579690069  | -1.051874707 |
| C | 2.125899388  | 3.112398085  | -0.956348943 |
| H | 2.164918966  | 1.554745779  | -2.476605825 |
| H | -0.244940851 | 0.997125363  | -2.221234225 |
| H | -1.530149095 | 1.902266566  | -0.288927544 |
| C | -0.650751460 | 2.453753314  | -0.637053169 |
| H | -1.006158103 | 3.204945827  | -1.363801188 |
| C | 0.037046166  | 3.191980775  | 0.522435430  |
| H | 0.219392456  | 2.491227253  | 1.353544649  |
| H | 1.954310560  | 4.184808799  | 0.981527831  |
| H | 3.203662246  | 3.287274653  | -1.005125801 |
| H | 4.223625087  | -0.373945510 | -1.538142527 |
| C | 3.958611409  | -0.084809950 | -0.510016795 |
| H | 4.868737839  | -0.124737989 | 0.108866974  |
| H | 3.585582178  | 0.947174424  | -0.534472778 |
| C | 2.872708684  | -1.039090494 | 0.004532600  |
| C | 2.267851109  | -0.602780492 | 1.394990510  |
| C | 3.214315331  | 0.211117009  | 2.282448757  |
| H | 2.692623940  | 0.487200193  | 3.211103814  |
| H | 3.536258327  | 1.134735868  | 1.784618627  |

|   |              |              |              |
|---|--------------|--------------|--------------|
| H | 4.106834000  | -0.376095486 | 2.555521098  |
| H | 4.226622424  | -2.629216060 | 0.656656356  |
| H | 3.765565797  | -2.689266117 | -1.064221125 |
| H | 2.596879289  | -3.198326729 | 0.175318907  |
| H | 0.962532511  | -2.337926477 | 1.598034840  |
| C | 1.696639364  | -1.783670239 | 2.195014879  |
| H | 2.491050580  | -2.464776896 | 2.540344173  |
| H | 1.170280351  | -1.388138351 | 3.075467570  |
| O | 1.150555934  | 0.242987621  | 1.016128791  |
| H | -1.418856688 | -0.084852312 | 2.993936434  |
| O | -1.378995459 | -1.567192783 | 0.818221940  |
| C | -2.106036225 | 0.279149837  | 2.217614253  |
| H | -2.685737851 | -2.168710066 | 3.108255447  |
| C | -3.299302403 | -1.918752830 | 2.229408455  |
| H | -3.506662781 | -2.848034187 | 1.683641594  |
| H | -4.251215105 | -1.492972521 | 2.588584863  |
| O | -0.817871438 | -2.091078021 | -1.425087745 |
| C | -0.597617289 | -1.758486446 | -2.781404662 |
| H | -0.658819465 | -2.685126048 | -3.376034764 |
| H | -1.358628781 | -1.051307245 | -3.160299380 |
| H | 0.403700873  | -1.319498722 | -2.927832573 |
| O | -2.231641634 | -0.146435586 | -0.851604401 |
| C | -4.216390440 | 0.748016489  | 0.200757960  |
| H | -4.670434655 | 0.990830890  | -0.772303892 |
| H | -3.651762763 | 1.626207818  | 0.538955346  |
| H | -5.029423708 | 0.551609101  | 0.919117305  |
| C | -4.107304810 | -1.638916403 | -0.572269968 |
| H | -3.461132400 | -2.519120141 | -0.686887580 |
| H | -4.988921617 | -1.908792050 | 0.031995633  |
| H | -4.449799832 | -1.332687541 | -1.571587421 |
| H | -1.562157451 | 1.017823626  | 1.619603294  |
| H | -2.964266640 | 0.767798627  | 2.707005647  |
| C | -3.308904180 | -0.475151579 | 0.045712857  |

|   |              |              |              |
|---|--------------|--------------|--------------|
| C | -2.542595495 | -0.914028931 | 1.352006679  |
| C | 3.393632204  | -2.478885564 | -0.049947879 |
| C | 1.381359495  | 3.777656615  | 0.130034302  |
| H | -0.618616405 | 3.997256148  | 0.900277815  |
| O | 1.729451099  | -0.944832520 | -0.880618628 |

TS ANTI A<sub>3</sub>

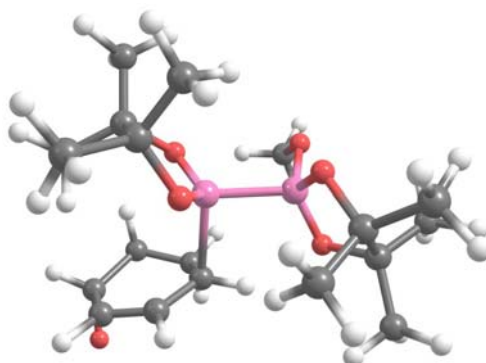

Electronic Energy=-8101.96 kcal/mol

|   |              |              |              |
|---|--------------|--------------|--------------|
| B | 0.777820684  | -0.325632822 | -0.268072459 |
| B | -1.106142191 | -0.999020546 | -0.474669414 |
| C | 1.083818357  | 2.511789072  | -0.556013924 |
| C | 0.364852874  | 1.604638358  | -1.360373648 |
| O | 2.481904903  | 4.071615699  | -2.639558134 |
| C | 2.318333264  | 3.036244573  | -0.936052707 |
| H | 2.842920457  | 3.738197583  | -0.286580340 |
| H | 0.410573834  | 0.564838310  | -3.262551720 |
| H | 0.299778479  | 2.329947851  | -3.329135309 |
| H | 0.656580136  | 2.816476537  | 0.403729686  |
| H | -0.700177104 | 1.470164233  | -1.172028652 |
| C | 0.794879215  | 1.488374318  | -2.808553778 |
| C | 2.309608570  | 1.614544601  | -3.029634151 |
| H | 2.799634221  | 0.688413993  | -2.689064492 |
| H | 2.529029185  | 1.732864087  | -4.104280678 |
| H | 4.034006574  | 2.692224098  | -2.256985745 |
| C | 2.923390387  | 2.807032443  | -2.276068594 |
| H | -3.235766805 | 2.039364166  | 0.373069638  |

|   |              |              |              |
|---|--------------|--------------|--------------|
| C | -3.931634158 | 1.222531968  | 0.142504954  |
| H | -4.406531195 | 1.442037049  | -0.825835580 |
| H | -4.720119569 | 1.200135895  | 0.912926858  |
| H | -2.565958988 | 1.274913179  | 2.597729511  |
| H | -1.225705797 | 1.246859495  | 1.408517014  |
| O | -2.112356510 | -0.008453437 | -0.873178003 |
| C | -1.812268178 | 0.638805835  | 2.106327668  |
| C | -3.202912858 | -0.119983281 | 0.065524347  |
| C | -4.162071903 | -1.213291371 | -0.438916643 |
| C | -2.460899843 | -0.554257863 | 1.383384666  |
| H | -1.118609111 | 0.255574302  | 2.866177511  |
| H | -3.638234508 | -2.176676360 | -0.491730364 |
| H | -5.049702545 | -1.316817870 | 0.206173995  |
| H | -4.171018955 | -0.758103061 | 2.736378851  |
| H | -2.694685581 | -1.614522729 | 3.251405441  |
| C | -3.312185092 | -1.349958213 | 2.379457039  |
| H | -3.679900400 | -2.281679472 | 1.930394821  |
| O | -1.442747359 | -1.428363347 | 0.877072544  |
| C | -0.703506060 | -1.972375888 | -2.692245087 |
| H | -0.902555926 | -2.922344700 | -3.215193257 |
| C | 1.618882987  | -2.201150772 | 2.085560912  |
| H | 2.390723496  | -2.914007591 | 2.416609771  |
| H | 1.037162042  | -1.880199246 | 2.960712872  |
| H | 0.922571288  | -2.700744477 | 1.400897212  |
| C | 2.235371551  | -0.957490462 | 1.426646370  |
| C | 3.131171584  | -0.227231558 | 2.429664536  |
| H | 4.010429698  | -0.835847194 | 2.696674126  |
| H | 3.473571850  | 0.736495569  | 2.031984929  |
| H | 2.558372645  | -0.033788139 | 3.348711759  |
| O | 1.801813340  | -1.050864898 | -0.904578416 |
| H | 0.348867354  | -1.691129787 | -2.869493925 |
| H | -1.358408107 | -1.193678956 | -3.123516159 |
| C | 3.396700947  | -2.699011142 | -0.150541815 |



|   |              |              |              |
|---|--------------|--------------|--------------|
| C | 2.905764467  | -1.261430746 | 0.032325092  |
| H | 2.574466763  | -3.416395921 | -0.038585231 |
| H | 4.188312444  | -2.944069482 | 0.576222134  |
| H | 3.814528503  | -2.813153827 | -1.161823222 |
| H | 4.895665715  | -0.403168039 | 0.338727674  |
| C | 4.025384538  | -0.279841860 | -0.324952760 |
| H | 4.352237996  | -0.466945210 | -1.357726160 |
| H | 3.674517554  | 0.759426534  | -0.262201142 |
| O | 1.140061060  | -0.076091966 | 1.072357825  |
| O | -0.955532715 | -2.168302904 | -1.314393641 |
| H | -4.496588249 | -0.946605354 | -1.451975325 |

TS SYN A<sub>2</sub>

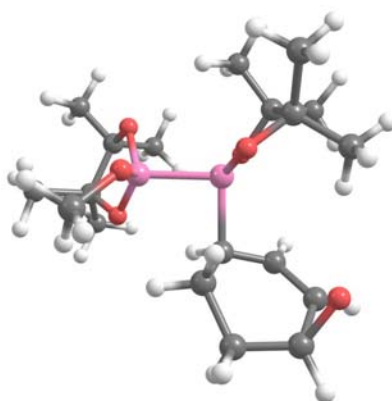

Electronic Energy=-8097.32 kcal/mol

|   |              |              |              |
|---|--------------|--------------|--------------|
| B | 0.811931900  | -0.042888796 | -0.395519485 |
| B | -1.063352549 | -0.963885954 | -0.544984398 |
| C | 0.167297436  | 1.550822796  | -1.219974015 |
| C | 1.236853546  | 2.473200252  | -1.018190700 |
| O | 2.592311123  | 2.221632805  | -3.309095212 |
| C | 1.970821332  | 3.086098193  | -2.098330827 |
| C | 1.449395950  | 3.067356463  | -3.475212523 |
| H | 1.619981105  | 3.946184198  | -4.124200544 |
| H | 2.686439391  | 3.870160903  | -1.836087747 |
| H | 1.531993754  | 2.741487811  | -0.001699261 |
| H | -0.716033406 | 1.687927636  | -0.588209094 |

|   |              |              |              |
|---|--------------|--------------|--------------|
| H | 3.484313524  | 1.161730147  | -0.753724960 |
| C | 0.092681423  | 2.412769301  | -3.661351712 |
| H | -0.669561519 | 3.202462083  | -3.517154871 |
| H | -0.013658772 | 2.055457126  | -4.701421246 |
| H | 4.110682272  | -0.009937175 | -1.918235812 |
| C | -0.148597658 | 1.237737252  | -2.690437061 |
| H | 0.484820783  | 0.399209366  | -3.009940429 |
| H | 3.679209404  | 1.132903882  | 1.576098335  |
| O | 1.285646180  | 0.174887995  | 0.936147477  |
| H | 2.987611155  | 0.331039225  | 3.008546833  |
| C | -3.019843133 | -0.450859476 | 0.651688468  |
| C | -3.658220924 | 0.782498111  | 1.296241691  |
| H | -4.306068287 | 1.285872874  | 0.562208741  |
| H | -2.892228894 | 1.497904857  | 1.621320131  |
| H | -2.026611671 | 0.030121977  | 3.356200363  |
| H | -4.276480504 | 0.503921349  | 2.165538350  |
| H | -0.560118027 | -0.959649533 | 3.125498308  |
| C | -2.038315441 | -1.263306921 | 1.585299936  |
| C | -4.121478552 | -1.341952531 | 0.048175256  |
| C | 2.040650842  | -1.914998036 | 1.879944315  |
| O | -1.099043915 | -1.815541239 | 0.647445679  |
| H | -1.928366510 | -2.943466399 | 2.940040097  |
| H | -3.486261781 | -2.080393462 | 3.013639516  |
| C | -2.692213671 | -2.433165818 | 2.334316418  |
| H | -3.117544561 | -3.167658860 | 1.638287928  |
| H | -4.862207464 | -1.653665124 | 0.801912629  |
| H | -4.642027940 | -0.775010655 | -0.737338830 |
| H | 1.261978041  | -2.439295013 | 1.312439179  |
| H | -3.682561254 | -2.238721969 | -0.408239202 |
| O | -0.925896419 | -1.691026906 | -1.776263501 |
| H | 2.855104621  | -3.092408611 | -0.319931550 |
| C | -1.939743832 | -1.662824898 | -2.759184586 |
| H | -2.671777209 | -0.857474105 | -2.585942256 |

|   |              |              |              |
|---|--------------|--------------|--------------|
| H | -1.188960649 | 0.901688718  | -2.780319054 |
| O | 1.751327680  | -0.824920328 | -1.097898352 |
| O | -2.161725232 | -0.017856055 | -0.419154437 |
| H | 3.867067532  | -2.397458726 | -1.606826677 |
| H | -2.490084754 | -2.625150907 | -2.782622230 |
| H | -1.484990941 | -1.512026602 | -3.753906187 |
| C | 2.976394378  | -0.911299186 | -0.323433783 |
| C | 3.933922346  | 0.163699438  | -0.847728439 |
| C | 2.469892245  | -0.634910242 | 1.146017850  |
| H | 4.899815295  | 0.146411812  | -0.317388683 |
| H | 1.612021603  | -1.636883585 | 2.853743493  |
| H | 4.481824456  | -2.448118890 | 0.066324827  |
| H | 4.384994231  | -0.397238724 | 2.174224907  |
| H | 2.893785145  | -2.588143965 | 2.060064721  |
| C | 3.579194582  | -2.300452175 | -0.549610039 |
| C | 3.444604310  | 0.157987931  | 2.022186280  |
| H | -0.800444280 | 0.463312874  | 2.112586597  |
| C | -1.322191965 | -0.363626103 | 2.605515146  |

TS SYN A<sub>3</sub>

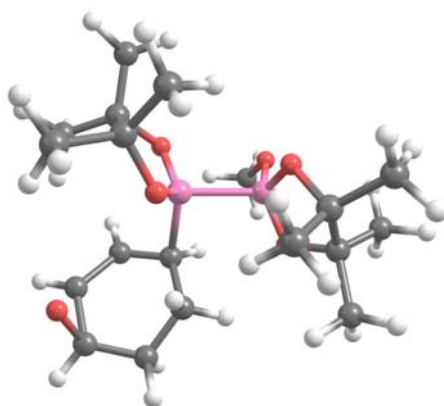

Electronic Energy=-8098.47 kcal/mol

|   |              |              |              |
|---|--------------|--------------|--------------|
| B | -1.138506070 | -1.093295622 | -0.481634507 |
| B | 0.747633477  | -0.167468550 | -0.264167020 |
| C | 0.162655983  | 1.543619085  | -0.969402268 |
| C | 1.405248111  | 2.120274840  | -1.361896495 |

|   |              |              |              |
|---|--------------|--------------|--------------|
| O | 2.037880596  | 3.370011337  | 0.890672099  |
| C | 1.988922266  | 3.263026519  | -0.691219355 |
| C | 1.141362200  | 4.169798709  | 0.105449823  |
| H | 2.919568696  | 3.665218703  | -1.102272502 |
| H | 1.982097011  | 1.674948205  | -2.174224993 |
| H | -0.204605337 | 1.929664968  | 1.122416530  |
| H | -0.845312316 | -1.175122938 | 3.149177141  |
| H | -0.490795425 | 1.221432948  | -1.781086519 |
| H | -1.127424899 | 0.270840968  | 2.175029439  |
| H | -1.640644374 | 2.073455015  | 0.095973709  |
| C | -0.334721048 | 3.820234119  | 0.134423533  |
| H | -0.793546374 | 4.278011489  | -0.763209193 |
| H | 1.365521647  | 5.250864655  | 0.115172774  |
| O | 1.229078577  | -0.068124175 | 1.061201728  |
| O | 1.668509893  | -0.927186763 | -1.038844255 |
| O | -2.257651019 | -0.160723346 | -0.403184529 |
| C | -2.245650573 | -1.495638682 | 1.542266493  |
| C | -2.904257513 | -2.706411500 | 2.215285923  |
| H | -1.673724511 | -0.367020132 | -3.007718810 |
| H | -3.250699011 | -3.437084763 | 1.473183037  |
| O | -0.986693611 | -1.848285811 | -1.694702912 |
| H | -1.068459601 | -1.885281564 | -3.737615584 |
| C | -0.905147902 | -1.158270109 | -2.924564773 |
| H | 0.090149968  | -0.703122879 | -3.063980055 |
| H | -2.167966331 | -3.203348371 | 2.864967060  |
| H | -3.610347032 | -2.450785393 | -0.659544219 |
| C | -4.160737526 | -1.622765551 | -0.193623694 |
| H | -4.645320252 | -1.041449646 | -0.991781949 |
| H | -4.943532885 | -2.031606214 | 0.466215469  |
| C | -3.185512029 | -0.697087265 | 0.557835821  |
| H | -3.757782787 | -2.397628215 | 2.841594142  |
| C | -3.958872184 | 0.457239859  | 1.200972224  |
| H | -4.642731586 | 0.090222709  | 1.984189958  |

|   |              |              |              |
|---|--------------|--------------|--------------|
| H | -4.560652822 | 0.968539279  | 0.433746142  |
| H | -3.275947235 | 1.192114181  | 1.645521994  |
| H | -2.368284365 | -0.264797585 | 3.357446188  |
| C | -1.618776843 | -0.599868881 | 2.622119432  |
| C | 2.399654652  | -0.906769497 | 1.219594303  |
| C | 2.879594577  | -1.143098473 | -0.269704971 |
| H | 1.525215092  | -1.936901251 | 2.897414333  |
| C | 1.945509177  | -2.199344836 | 1.915727157  |
| H | 1.153834226  | -2.692497566 | 1.338241491  |
| H | 2.588359397  | -3.303075182 | -0.381161117 |
| H | 3.653385816  | -2.627450226 | -1.633946177 |
| H | 2.785122671  | -2.894772970 | 2.075245730  |
| C | 3.928210456  | -0.123923770 | -0.734837863 |
| H | 4.103082482  | -0.265245523 | -1.812463827 |
| H | 4.886214245  | -0.253169801 | -0.207099114 |
| H | 4.345336993  | -0.719339396 | 2.206080569  |
| H | 3.568952504  | 0.901230283  | -0.575399138 |
| H | 2.967763189  | -0.042001613 | 3.113408721  |
| H | 3.606777497  | 0.842287080  | 1.714506843  |
| C | 3.399630232  | -0.160373450 | 2.108357190  |
| C | 3.374249638  | -2.561552615 | -0.571316433 |
| H | 4.261741064  | -2.813937822 | 0.032043742  |
| H | -0.823771517 | 4.278828471  | 1.012169637  |
| O | -1.218577173 | -1.982058807 | 0.660381926  |
| C | -0.569985948 | 2.296091101  | 0.153557407  |

BORANE CY6 1,4-ANTI (Intermediate)

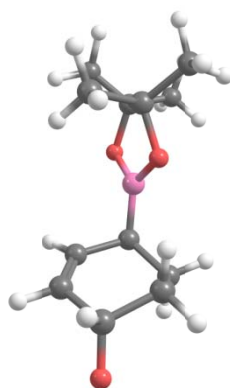

Electronic Energy=-4779.27 kcal/mol

|   |              |              |              |
|---|--------------|--------------|--------------|
| C | -0.141398759 | 0.559185613  | -0.642833905 |
| C | 1.374495915  | 0.541867245  | -0.327869684 |
| C | 1.702463812  | 1.579435330  | 0.752803201  |
| C | 0.767165274  | 2.082960864  | 1.589376355  |
| C | -0.740531158 | 1.824465446  | 1.507000164  |
| C | -0.993562219 | 0.548714693  | 0.634410573  |
| H | 2.742354198  | 1.931780290  | 0.788171670  |
| H | -0.371394626 | 1.496795372  | -1.178897131 |
| H | -0.401606013 | -0.283426564 | -1.309935207 |
| H | 1.051564847  | 2.877680071  | 2.290168098  |
| H | -0.783542928 | -0.367989165 | 1.216616568  |
| H | -2.065273023 | 0.554343900  | 0.376356202  |
| H | 1.938121331  | 0.817343754  | -1.239958256 |
| H | -1.062119688 | 1.511882533  | 2.560077095  |
| O | -1.340234145 | 2.950667273  | 1.052103644  |
| C | 2.256342738  | -2.725437622 | 1.440556456  |
| C | 3.518577590  | -2.499921710 | 0.532015201  |
| B | 1.973569728  | -0.813879258 | 0.192044369  |
| O | 1.274313861  | -1.843796680 | 0.820910522  |
| O | 3.341284956  | -1.122303948 | 0.088248549  |
| C | 2.457618220  | -2.233303816 | 2.879601003  |
| H | 1.482935877  | -2.222861714 | 3.386196436  |
| H | 3.142607812  | -2.885933783 | 3.442860292  |

|   |             |              |              |
|---|-------------|--------------|--------------|
| H | 2.847411642 | -1.205981347 | 2.889810037  |
| C | 1.693483801 | -4.145436371 | 1.441435881  |
| H | 2.425309156 | -4.860969892 | 1.848911463  |
| H | 0.795292349 | -4.176157190 | 2.074621624  |
| H | 1.407261776 | -4.465332328 | 0.431544964  |
| C | 4.863000127 | -2.618761848 | 1.247798258  |
| H | 5.001045680 | -3.632937018 | 1.655997703  |
| H | 5.678098044 | -2.423947729 | 0.535337692  |
| H | 4.944192619 | -1.893839007 | 2.067044077  |
| C | 3.511648419 | -3.378426724 | -0.726825256 |
| H | 4.297444672 | -3.024253647 | -1.408823847 |
| H | 3.703875149 | -4.436087705 | -0.490039444 |
| H | 2.546742627 | -3.302144146 | -1.246395335 |

BORANE CY6 1,4-SYN (Intermediate)

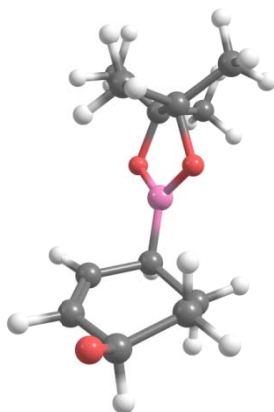

Electronic Energy=-4778.32 kcal/mol

|   |              |              |              |
|---|--------------|--------------|--------------|
| C | -0.149185511 | 0.490764812  | -0.551869660 |
| C | 1.375392045  | 0.509129282  | -0.272217445 |
| C | 1.709494107  | 1.542346198  | 0.808300359  |
| C | 0.766949070  | 2.169618091  | 1.544056585  |
| C | -0.742908295 | 1.886974664  | 1.548427206  |
| C | -0.975745358 | 0.566343707  | 0.740395324  |
| H | 2.778228030  | 1.746609341  | 0.967135653  |
| H | -0.389989552 | 1.371295705  | -1.177481581 |
| H | -0.415242832 | -0.402054282 | -1.148939045 |
| H | 1.068153016  | 2.904267180  | 2.301998748  |
| H | -0.708474469 | -0.262020953 | 1.416611306  |
| H | -2.054071698 | 0.474658272  | 0.525562604  |
| H | 1.916364861  | 0.802046065  | -1.194238948 |
| C | 2.285131348  | -2.795582461 | 1.394646499  |
| C | 3.557037485  | -2.526656571 | 0.510823201  |
| B | 1.992283353  | -0.858488563 | 0.200752399  |
| O | 1.297833493  | -1.916716809 | 0.778184873  |
| O | 3.363117170  | -1.138719326 | 0.103020102  |
| C | 2.452527185  | -2.329178233 | 2.846242734  |
| H | 1.467891699  | -2.335279396 | 3.333059910  |
| H | 3.133086922  | -2.985879603 | 3.409881837  |
| H | 2.830898175  | -1.298346492 | 2.885954609  |
| C | 1.751640153  | -4.226003556 | 1.356507039  |



|   |              |              |              |
|---|--------------|--------------|--------------|
| H | 2.493819263  | -4.933308729 | 1.759223894  |
| H | 0.846756305  | -4.288970282 | 1.977453645  |
| H | 1.486207428  | -4.531303412 | 0.336408535  |
| C | 4.892922810  | -2.640213078 | 1.242286959  |
| H | 5.044943047  | -3.661960847 | 1.624731171  |
| H | 5.713714394  | -2.409797316 | 0.547015206  |
| H | 4.947418943  | -1.936453004 | 2.081839866  |
| C | 3.581394518  | -3.369783916 | -0.771278839 |
| H | 4.367091453  | -2.981951195 | -1.435035158 |
| H | 3.792604650  | -4.429122341 | -0.560558413 |
| H | 2.620518686  | -3.299694350 | -1.299241252 |
| H | -1.197727306 | 2.703545117  | 0.875456002  |
| O | -1.228957464 | 1.861092984  | 2.805792181  |

BORANE CY6 1,4-ANTI

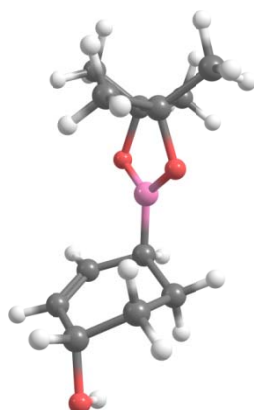

Electronic Energy=-4866.48 kcal/mol

|   |              |              |              |
|---|--------------|--------------|--------------|
| C | -0.017940759 | 0.566547164  | -0.654024154 |
| C | 1.456831226  | 0.601456231  | -0.204358375 |
| C | 1.670991539  | 1.637067384  | 0.877525089  |
| C | 0.680064737  | 2.165692243  | 1.617785196  |
| C | -0.771828127 | 1.802751382  | 1.444306620  |
| C | -0.963177571 | 0.565821315  | 0.554784216  |
| H | 2.704052685  | 1.941261763  | 1.070064734  |
| H | -0.225604725 | 1.453317194  | -1.278916285 |
| H | -0.208352427 | -0.315120150 | -1.282960672 |

|   |              |              |              |
|---|--------------|--------------|--------------|
| H | 0.908470829  | 2.921395439  | 2.375406928  |
| H | -0.773096264 | -0.337569167 | 1.157995768  |
| H | -2.014893164 | 0.529908958  | 0.235070224  |
| H | 2.093719636  | 0.888926515  | -1.062721601 |
| H | -1.220721860 | 1.605289094  | 2.430207886  |
| O | -1.525524449 | 2.953624977  | 0.958745217  |
| H | -0.974249014 | 3.363888469  | 0.265040042  |
| C | 2.119991322  | -2.947753868 | 1.070477490  |
| C | 3.579612212  | -2.374250895 | 0.915295368  |
| B | 2.036093040  | -0.790920942 | 0.294905283  |
| O | 1.315677401  | -1.969152104 | 0.315438361  |
| O | 3.336055822  | -0.932115368 | 0.744110526  |
| C | 1.605099107  | -2.912118158 | 2.512517000  |
| H | 0.529517975  | -3.135244630 | 2.511307463  |
| H | 2.112588327  | -3.659193298 | 3.139449605  |
| H | 1.749221914  | -1.920005773 | 2.962020838  |
| C | 1.894581542  | -4.326266449 | 0.459012200  |
| H | 2.520951045  | -5.079744688 | 0.960115753  |
| H | 0.843129065  | -4.617298926 | 0.590581462  |
| H | 2.120942299  | -4.336748317 | -0.613989025 |
| C | 4.482355923  | -2.566188619 | 2.129671666  |
| H | 4.639244054  | -3.636459851 | 2.332765145  |
| H | 5.462766283  | -2.110234653 | 1.933384768  |
| H | 4.059530589  | -2.095352995 | 3.025378120  |
| C | 4.285164134  | -2.851066823 | -0.357460500 |
| H | 5.199649309  | -2.259342041 | -0.498911128 |
| H | 4.565723617  | -3.911894108 | -0.289425143 |
| H | 3.646947650  | -2.713454796 | -1.241042315 |

BORANE CY6 1,4-SYN

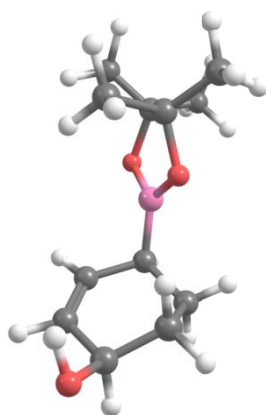

Electronic Energy=-4866.09 kcal/mol

|   |              |              |              |
|---|--------------|--------------|--------------|
| C | -0.170453299 | 0.433445926  | -0.513044627 |
| C | 1.352749190  | 0.492928103  | -0.255817706 |
| C | 1.694383516  | 1.579815407  | 0.744065513  |
| C | 0.784702244  | 2.213429486  | 1.503731055  |
| C | -0.692456209 | 1.905639169  | 1.476396598  |
| C | -0.973497274 | 0.565680107  | 0.788910928  |
| H | 2.751882433  | 1.845883588  | 0.839118585  |
| H | -0.447334188 | 1.257241474  | -1.193240878 |
| H | -0.439965368 | -0.502695577 | -1.024105780 |
| H | 1.094965200  | 3.003865693  | 2.194421266  |
| H | -0.685285527 | -0.248552726 | 1.474428174  |
| H | -2.053127924 | 0.466637440  | 0.602167326  |
| H | 1.873883402  | 0.743908043  | -1.197640363 |
| C | 2.293482591  | -2.829740525 | 1.394552235  |
| C | 3.564911069  | -2.527178275 | 0.516206265  |
| B | 2.000601858  | -0.867865768 | 0.243412446  |
| O | 1.296220463  | -1.901723816 | 0.830395866  |
| O | 3.356502134  | -1.119075806 | 0.136273699  |
| C | 2.468517179  | -2.438984195 | 2.865177529  |
| H | 1.491623105  | -2.489524737 | 3.364993871  |
| H | 3.157876837  | -3.120752489 | 3.383489717  |
| H | 2.850400687  | -1.413218299 | 2.961049137  |
| C | 1.747174478  | -4.248848430 | 1.282623589  |

|   |              |              |              |
|---|--------------|--------------|--------------|
| H | 2.487208455  | -4.978575864 | 1.644713742  |
| H | 0.845472434  | -4.343875739 | 1.903512832  |
| H | 1.479476338  | -4.501215417 | 0.249521806  |
| C | 4.899197900  | -2.635722468 | 1.246639877  |
| H | 5.063595095  | -3.663312826 | 1.604959680  |
| H | 5.716326524  | -2.381823358 | 0.557067159  |
| H | 4.948519012  | -1.951667656 | 2.102468730  |
| C | 3.601968079  | -3.329684467 | -0.787830345 |
| H | 4.389168302  | -2.920052216 | -1.435054819 |
| H | 3.823422681  | -4.390344809 | -0.601304624 |
| H | 2.645638895  | -3.260813317 | -1.324190080 |
| H | -1.222635406 | 2.712884623  | 0.942817142  |
| O | -1.261851431 | 1.962532100  | 2.808536173  |
| H | -0.763272727 | 1.315409509  | 3.344760042  |

2-METHYL-2-VINYLOXIRANE R (7)

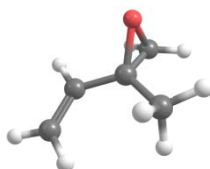

Electronic Energy=-1804.92 kcal/mol

|   |              |              |              |
|---|--------------|--------------|--------------|
| C | -1.210397399 | 0.246499610  | -0.245295897 |
| C | 0.184259323  | -0.184327263 | 0.030906181  |
| O | -0.231964004 | 1.223979005  | 0.148352697  |
| H | -1.542870624 | 0.310249361  | -1.287316647 |
| H | -1.995380060 | 0.049708145  | 0.492797731  |
| C | 0.458676739  | -0.811468018 | 1.349845351  |
| H | -0.184619988 | -0.453821029 | 2.160235486  |
| C | 1.400881026  | -1.729343436 | 1.599326522  |
| H | 2.065434670  | -2.104358468 | 0.818818066  |
| H | 1.533099690  | -2.140019727 | 2.600498221  |
| C | 1.111911675  | -0.467816594 | -1.127208656 |

|   |             |              |              |
|---|-------------|--------------|--------------|
| H | 2.146837301 | -0.200797911 | -0.869009996 |
| H | 1.087700879 | -1.534124323 | -1.398084436 |
| H | 0.809768171 | 0.122189387  | -2.001640588 |

2-METHYL-2-VINYLOXIRANE R' (7)

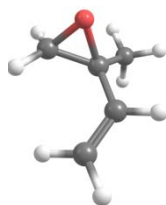

Electronic Energy=-1802.55 kcal/mol

|   |              |              |              |
|---|--------------|--------------|--------------|
| C | -1.230288783 | 0.324091148  | -0.245882119 |
| C | 0.135475678  | -0.139423459 | 0.063004766  |
| O | -0.193026504 | 1.293940672  | 0.035896636  |
| H | -1.574156870 | 0.304408150  | -1.285851770 |
| H | -2.015296489 | 0.260736381  | 0.513613965  |
| C | 0.467578625  | -0.671175665 | 1.420294430  |
| H | 1.519386209  | -0.565187648 | 1.710636067  |
| C | -0.389648396 | -1.259116418 | 2.260364405  |
| H | -1.440527340 | -1.405186649 | 2.001095096  |
| H | -0.066046173 | -1.618087763 | 3.237960976  |
| C | 1.064981546  | -0.566472133 | -1.052133482 |
| H | 2.099920023  | -0.279750885 | -0.812233126 |
| H | 1.038285964  | -1.658444218 | -1.188305873 |
| H | 0.781970446  | -0.080787272 | -1.994916027 |

TS ANTI R

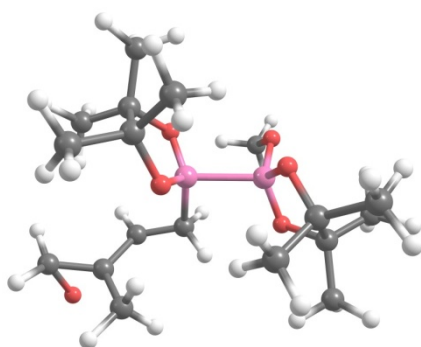

Electronic Energy=-7902.87 kcal/mol

|   |              |              |              |
|---|--------------|--------------|--------------|
| B | -1.212485137 | -1.155327366 | -0.499212653 |
| B | 0.583297478  | -0.081418491 | -0.341263493 |
| C | -0.123884738 | 1.357797418  | -1.260032108 |
| C | 0.926542986  | 2.314850379  | -1.304203472 |
| O | 1.573160988  | 4.727225921  | -0.858416710 |
| C | 1.182919719  | 3.325748042  | -0.281323353 |
| C | 2.523686803  | 3.942111755  | -0.129149383 |
| H | 3.360951527  | 3.548554204  | -0.723910572 |
| H | 1.696885733  | 2.222694513  | -2.076404121 |
| H | 2.826775258  | 4.349285371  | 0.849126603  |
| H | -0.405995299 | 0.930021452  | -2.224021351 |
| H | -1.020497682 | 1.605802880  | -0.687461093 |
| C | 0.220937626  | 3.458280814  | 0.877006051  |
| H | 0.231479008  | 2.535469363  | 1.476308841  |
| H | 0.501586719  | 4.311939730  | 1.510240081  |
| H | -0.803487928 | 3.621896433  | 0.510131038  |
| H | -1.562940979 | 0.778293765  | 1.702104024  |
| H | -1.259920741 | -0.366490535 | 3.013262516  |
| C | -2.027674588 | 0.001153750  | 2.319033113  |
| H | -2.852682928 | 0.441117708  | 2.902524590  |
| O | -2.368685015 | -0.290699403 | -0.724627553 |
| H | -1.558561841 | -1.027120698 | -3.149663161 |
| O | -1.379210357 | -1.782015228 | 0.799907292  |
| O | -0.920700547 | -2.149087582 | -1.499527377 |

|   |              |              |              |
|---|--------------|--------------|--------------|
| H | 0.219006781  | -1.231289374 | -2.983789162 |
| H | -0.797235665 | -2.611987331 | -3.489133703 |
| H | -2.486684506 | -2.502625360 | 3.152543414  |
| C | -3.173775694 | -2.227644357 | 2.337788253  |
| C | -2.507532659 | -1.171400380 | 1.448700924  |
| H | -4.102275360 | -1.841120590 | 2.789978261  |
| H | -3.404802642 | -3.136826522 | 1.767719025  |
| C | -3.373990123 | -0.691055366 | 0.223530807  |
| C | -4.291153452 | 0.501728148  | 0.501748361  |
| H | -3.713793729 | 1.375998960  | 0.828849042  |
| H | -5.038931553 | 0.258969204  | 1.274895756  |
| H | -4.827493267 | 0.773648654  | -0.420342990 |
| C | -4.184590410 | -1.844802909 | -0.396936064 |
| H | -3.524910516 | -2.698336832 | -0.601785810 |
| H | -5.012796123 | -2.172024709 | 0.252678831  |
| H | -4.605474696 | -1.499872714 | -1.352759265 |
| O | 1.614205533  | -0.829895041 | -0.981503841 |
| O | 0.990976829  | 0.191620327  | 1.004256782  |
| C | 2.177658534  | -0.577476268 | 1.303549506  |
| C | 2.778438331  | -0.885256379 | -0.125371694 |
| C | 1.728861108  | -1.842623553 | 2.052598833  |
| H | 2.582312632  | -2.481275664 | 2.331144616  |
| H | 2.671643141  | -3.062106279 | -0.070769012 |
| H | 1.210576698  | -1.535406619 | 2.972467125  |
| H | 1.011755848  | -2.414321247 | 1.451654587  |
| C | 3.408152589  | -2.273985767 | -0.270387293 |
| H | 4.263877018  | -2.399230966 | 0.413301102  |
| H | 4.025698729  | -0.274581416 | 2.434144231  |
| H | 4.693727912  | 0.197581826  | -0.024093231 |
| C | 3.086830976  | 0.258919570  | 2.210617553  |
| H | 4.019821013  | -0.028017172 | -1.663249088 |
| H | 2.570481855  | 0.450941948  | 3.163171810  |
| H | 3.298436538  | 1.178996511  | -0.573903154 |

|   |              |              |              |
|---|--------------|--------------|--------------|
| H | 3.329403776  | 1.226713533  | 1.753566688  |
| C | 3.763780696  | 0.185055538  | -0.614407887 |
| C | -0.757414991 | -1.722962724 | -2.838043142 |
| H | 3.772231736  | -2.401445285 | -1.301097293 |

TS ANTI R'

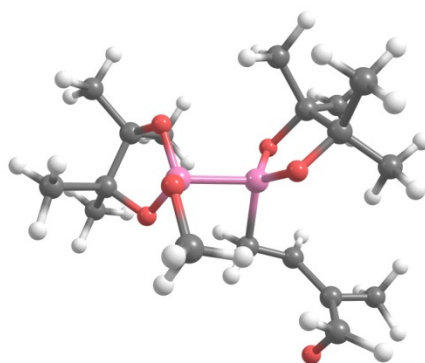

Electronic Energy=-7901.74 kcal/mol

|   |              |              |              |
|---|--------------|--------------|--------------|
| B | -1.256493101 | -1.194231489 | -0.372634758 |
| B | 0.643649487  | -0.781467696 | 0.128145230  |
| C | 0.549529932  | 0.979733195  | -0.669806857 |
| C | 1.826963256  | 1.551573504  | -0.532709449 |
| O | 2.356592917  | 2.389811399  | -2.905906826 |
| C | 2.828464529  | 1.717137032  | -1.582664090 |
| C | 4.169868468  | 2.279335443  | -1.152769561 |
| H | 4.754844886  | 2.594061923  | -2.027828594 |
| H | 4.749597815  | 1.530080696  | -0.587650415 |
| H | 4.024148471  | 3.153341960  | -0.499145735 |
| C | 2.817435654  | -1.046911570 | 2.955060445  |
| H | 3.352272817  | -0.193063296 | 2.519230943  |
| H | 3.704801624  | 0.791966598  | -3.415108803 |
| H | 3.555255049  | -1.792094492 | 3.295516946  |
| H | 2.262781311  | -0.688296919 | 3.835117306  |
| C | 2.766103440  | 1.016413149  | -2.882998759 |
| C | 3.799238247  | -1.444591053 | 0.258103021  |
| H | 4.602000310  | -1.671017695 | 0.977550918  |
| H | 4.123714206  | -1.771177426 | -0.740976143 |



|   |              |              |              |
|---|--------------|--------------|--------------|
| H | 3.639122768  | -0.357812381 | 0.225436618  |
| H | 1.970206725  | 0.280133546  | -3.048127822 |
| C | 1.829101056  | -1.654110431 | 1.952545891  |
| C | 2.486475830  | -2.158160514 | 0.602995799  |
| C | 2.680642096  | -3.675307027 | 0.513084803  |
| H | 3.376156101  | -4.037160436 | 1.288338321  |
| H | 3.102691924  | -3.928698565 | -0.470945259 |
| H | 1.724110286  | -4.202400317 | 0.616971722  |
| H | 1.589569077  | -3.567502689 | 3.017758863  |
| O | 1.512580795  | -1.773361066 | -0.397484583 |
| C | 0.978277515  | -2.727041473 | 2.651674725  |
| H | 0.475823746  | -2.263780322 | 3.513416135  |
| H | 0.196041944  | -3.096665787 | 1.977167363  |
| O | 0.931698324  | -0.610841577 | 1.516918745  |
| H | 0.164270695  | 0.848385231  | -1.682921740 |
| H | -0.235803225 | 1.335240530  | -0.002107552 |
| H | 2.134736441  | 1.892307643  | 0.461059495  |
| O | -1.178077008 | -2.171952058 | -1.439137162 |
| C | -0.700649369 | -1.729342295 | -2.691733486 |
| H | 0.382001270  | -1.512799867 | -2.655988610 |
| H | -1.229740037 | -0.822475181 | -3.041334700 |
| H | -0.865831847 | -2.532663420 | -3.429117082 |
| O | -1.797497198 | -1.825733113 | 0.831883110  |
| H | -1.589768963 | -0.612613787 | 3.164496186  |
| H | -1.366689597 | 0.632864582  | 1.933692404  |
| C | -2.116131545 | -0.004168215 | 2.416716681  |
| C | -2.780669298 | -0.941981984 | 1.394102244  |
| C | -3.289153479 | -0.164993483 | 0.122995772  |
| H | -2.857887478 | 0.628469297  | 2.931011208  |
| C | -3.881460468 | 1.219925358  | 0.394883876  |
| H | -3.140176591 | 1.880101817  | 0.863735346  |
| H | -4.190358807 | 1.678576570  | -0.557122144 |
| H | -4.767347354 | 1.155888486  | 1.048521943  |

|   |              |              |              |
|---|--------------|--------------|--------------|
| C | -4.279650200 | -1.006886647 | -0.705112185 |
| H | -4.439051907 | -0.507176318 | -1.671839676 |
| C | -3.839955105 | -1.794678786 | 2.102414659  |
| H | -3.380347064 | -2.303898887 | 2.963488855  |
| H | -3.855036255 | -2.000459079 | -0.899550587 |
| H | -4.245534931 | -2.562372910 | 1.430709956  |
| H | -4.668283459 | -1.170664894 | 2.477685183  |
| H | -5.255073608 | -1.117331013 | -0.203197058 |
| O | -2.079356251 | -0.007189823 | -0.634987865 |

TS SYN R

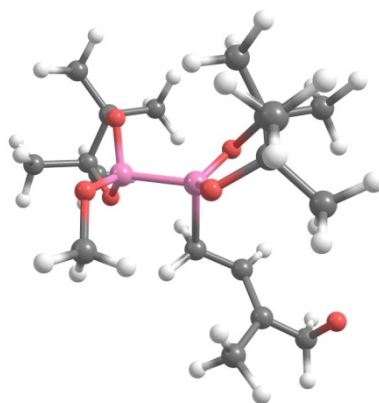

Electronic Energy=-7901.99 kcal/mol

|   |              |              |              |
|---|--------------|--------------|--------------|
| B | -1.039665065 | -0.950658193 | -0.608664168 |
| B | 0.745535781  | -0.201148730 | -0.336198706 |
| C | 0.138799671  | 1.595416224  | -1.335866984 |
| C | 1.143810911  | 2.569764291  | -1.344564626 |
| O | 3.742052223  | 3.227826098  | -2.102799039 |
| C | 1.937863182  | 2.921730341  | -2.464977361 |
| C | 2.752611797  | 4.153015545  | -2.441668306 |
| H | 2.486015640  | 4.893370505  | -1.658710305 |
| H | 1.297957502  | 3.164082436  | -0.438182544 |
| H | 2.878196825  | 4.669836764  | -3.418823107 |
| H | -0.678829557 | 1.698524982  | -0.626453216 |
| H | -0.172560182 | 1.161241007  | -2.285125192 |
| C | 1.878403020  | 2.141068855  | -3.749708384 |

|   |              |              |              |
|---|--------------|--------------|--------------|
| H | 0.927062205  | 2.339509254  | -4.274415157 |
| H | 2.708490024  | 2.431505227  | -4.405724609 |
| H | 1.934631626  | 1.059094111  | -3.565271598 |
| H | -1.254805164 | 0.742807080  | 1.823364354  |
| H | -1.130334220 | -0.559891844 | 3.010029926  |
| C | -1.824592589 | -0.042033994 | 2.333680601  |
| H | -2.625896420 | 0.415470613  | 2.936436695  |
| O | -2.119497690 | 0.043903449  | -0.726271815 |
| H | -1.371278768 | -0.618422912 | -3.293156468 |
| O | -1.296079498 | -1.695274945 | 0.629561807  |
| O | -0.919114036 | -1.903652633 | -1.701347983 |
| H | 0.369756521  | -0.999910231 | -3.069888709 |
| H | -0.743505681 | -2.241589910 | -3.710244027 |
| H | -2.518192631 | -2.576423027 | 2.865123363  |
| C | -3.159835592 | -2.146339782 | 2.080960611  |
| C | -2.380595392 | -1.062788195 | 1.325542886  |
| H | -4.057283952 | -1.727186627 | 2.565984681  |
| H | -3.463310661 | -2.958319045 | 1.407600346  |
| C | -3.174872240 | -0.373252495 | 0.152610673  |
| C | -3.990623820 | 0.858107094  | 0.555089558  |
| H | -3.344520076 | 1.636732450  | 0.981365228  |
| H | -4.769726732 | 0.599999549  | 1.291432369  |
| H | -4.485484006 | 1.276139352  | -0.335108170 |
| C | -4.071206257 | -1.371575987 | -0.604479759 |
| H | -3.485334070 | -2.252315375 | -0.897835167 |
| H | -4.940728440 | -1.691045737 | -0.007073575 |
| H | -4.436795563 | -0.883629082 | -1.520008765 |
| O | 1.780124297  | -0.931782993 | -0.947413811 |
| O | 1.138371254  | 0.184584107  | 0.966493071  |
| C | 2.315174791  | -0.589887108 | 1.331893004  |
| C | 2.945113772  | -0.949184371 | -0.067349055 |
| C | 1.818744242  | -1.822770404 | 2.104105972  |
| H | 2.652406998  | -2.465777917 | 2.427939568  |

|   |              |              |              |
|---|--------------|--------------|--------------|
| H | 2.833253878  | -3.128009099 | 0.069644758  |
| H | 1.276098016  | -1.482147464 | 2.997671068  |
| H | 1.114578257  | -2.404383610 | 1.495648214  |
| C | 3.570179008  | -2.344665915 | -0.147907554 |
| H | 4.413951336  | -2.440749609 | 0.555072453  |
| H | 4.124526054  | -0.268114039 | 2.506075865  |
| H | 4.855716596  | 0.114507621  | 0.024278406  |
| C | 3.200973993  | 0.269216557  | 2.234871567  |
| H | 4.216174290  | -0.160122073 | -1.614771766 |
| H | 2.656551794  | 0.499880726  | 3.163020078  |
| H | 3.506037078  | 1.106140470  | -0.604609655 |
| H | 3.472067157  | 1.214060138  | 1.747721368  |
| C | 3.936589087  | 0.096528641  | -0.582945708 |
| C | -0.654017688 | -1.407720007 | -2.994019283 |
| H | 3.955236275  | -2.510042392 | -1.165026830 |

TS SYN R'

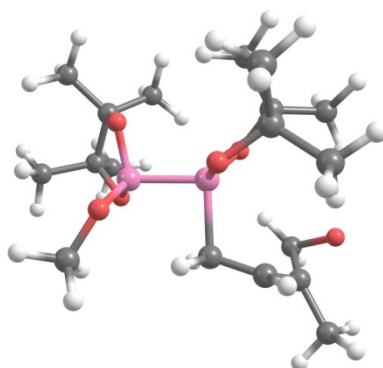

Electronic Energy=-7898.11 kcal/mol

|   |              |              |              |
|---|--------------|--------------|--------------|
| B | -1.018595035 | -1.008060336 | -0.521706052 |
| B | 0.889891687  | -0.339805331 | -0.454769263 |
| C | 0.344131533  | 1.171142390  | -1.459028346 |
| C | 1.496103320  | 1.946444290  | -1.755186278 |
| O | 2.882344139  | 2.984618264  | 0.270389129  |
| C | 1.972214726  | 3.120191661  | -1.042315847 |
| C | 1.534947187  | 3.469709127  | 0.319426788  |
| H | 1.425085709  | 4.533795596  | 0.590656393  |
| H | 0.823258113  | 2.805303796  | 0.826312064  |
| H | 3.024202362  | 5.000003345  | -1.262597184 |
| H | 1.856073453  | 4.650993926  | -2.581406617 |
| H | 3.406710886  | 3.785293807  | -2.509560124 |
| C | 2.596443431  | 4.208883972  | -1.895014043 |
| H | 2.129812055  | 1.618252671  | -2.587285796 |
| H | -0.069834028 | 0.640469319  | -2.315493472 |
| H | -0.428309043 | 1.632859582  | -0.838442080 |
| O | 1.728260931  | -1.233779527 | -1.160108116 |
| O | 1.438680505  | -0.067337627 | 0.820258256  |
| C | 2.982267483  | -1.380635267 | -0.445342261 |
| C | 2.636567604  | -0.870362439 | 1.015910631  |
| C | 3.701638359  | 0.024178003  | 1.656061614  |
| H | 3.813616322  | 0.959806499  | 1.093564778  |
| H | 3.381559282  | 0.287357972  | 2.676256672  |
| C | 4.026748195  | -0.512802724 | -1.159094487 |

|   |              |              |              |
|---|--------------|--------------|--------------|
| H | 5.020025196  | -0.604058506 | -0.692020317 |
| H | 4.671430402  | -0.495773840 | 1.728542379  |
| H | 3.727241649  | 0.543511082  | -1.147559214 |
| C | 3.390237897  | -2.855811464 | -0.533244999 |
| H | 3.572398989  | -3.114139259 | -1.587185919 |
| H | 4.314033252  | -3.053748923 | 0.034501717  |
| H | 2.592327478  | -3.509468590 | -0.158851731 |
| C | 2.277626907  | -2.014822114 | 1.973383516  |
| H | 1.951106782  | -1.582259635 | 2.929359785  |
| H | 1.452805010  | -2.613932717 | 1.567739452  |
| H | 3.145691423  | -2.663811755 | 2.169629392  |
| C | -1.033500582 | -1.242800638 | 2.715763409  |
| H | -0.305922731 | -1.994620527 | 3.048329932  |
| H | -0.474166606 | -0.352289467 | 2.404445266  |
| H | -1.685766256 | -0.998457371 | 3.569530508  |
| C | -1.837387163 | -1.817685785 | 1.539064873  |
| C | -2.827375608 | -0.754507665 | 0.924171321  |
| C | -2.492609791 | -3.135433605 | 1.976530988  |
| O | -1.206196474 | -1.465935077 | -1.884175775 |
| H | -1.711747419 | -3.813341653 | 2.353606623  |
| H | -3.224497456 | -2.973878581 | 2.786050373  |
| H | -2.991516319 | -3.632746451 | 1.134797364  |
| O | -0.963343616 | -2.117529357 | 0.434257065  |
| C | -2.094658415 | -0.802912566 | -2.760475812 |
| H | -1.564267517 | -0.470560738 | -3.672084752 |
| H | -2.899201979 | -1.494412086 | -3.082126642 |
| H | -2.568345930 | 0.073177669  | -2.290456003 |
| O | -1.987540736 | -0.044624997 | -0.005376641 |
| C | -3.975898414 | -1.421455851 | 0.142418644  |
| H | -4.518749617 | -0.646826749 | -0.418650130 |
| H | -4.688680756 | -1.931573346 | 0.810520314  |
| H | -3.575652654 | -2.151170710 | -0.573696554 |
| C | -3.405158203 | 0.250798639  | 1.923808689  |

|   |              |              |              |
|---|--------------|--------------|--------------|
| H | -2.607120568 | 0.844054454  | 2.388191972  |
| H | -4.085259972 | 0.940562307  | 1.400482348  |
| H | -3.977815154 | -0.259285684 | 2.716150912  |
| H | 4.101481654  | -0.844589333 | -2.205913871 |

BORANE MV E (Intermediate)

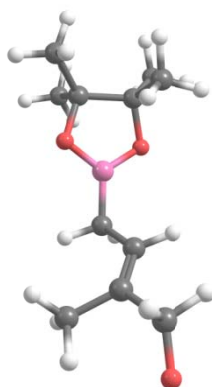

Electronic Energy=-4575.95 kcal/mol

|   |              |             |              |
|---|--------------|-------------|--------------|
| C | -0.642263705 | 1.393953383 | 0.117417067  |
| C | -1.674720321 | 1.214454636 | 1.256822564  |
| H | -1.188967122 | 1.690276875 | 2.170013662  |
| C | 0.557179908  | 1.976613704 | 0.319160627  |
| H | 0.787086159  | 2.336082895 | 1.331563426  |
| C | 1.662697732  | 2.167301971 | -0.720221802 |
| H | 2.503284499  | 1.473669154 | -0.508864781 |
| H | 1.288669999  | 1.916720948 | -1.722873880 |
| C | 3.170273549  | 5.561893846 | 0.115226705  |
| C | 2.857104003  | 5.727993053 | -1.418725985 |
| C | 2.117836700  | 6.214236699 | 1.019932645  |
| H | 2.292203392  | 5.887751161 | 2.054368197  |
| H | 2.176840079  | 7.312965262 | 0.984904630  |
| H | 1.104332889  | 5.900738025 | 0.735420696  |
| C | 4.571917817  | 5.995627844 | 0.541316437  |
| H | 4.723524520  | 7.071220821 | 0.358809915  |
| H | 4.697765186  | 5.811077612 | 1.617689402  |
| H | 5.347580575  | 5.432953418 | 0.006801095  |

|   |              |              |              |
|---|--------------|--------------|--------------|
| C | 2.117478026  | 7.010464421  | -1.793749933 |
| H | 2.724557263  | 7.897166480  | -1.550557004 |
| H | 1.921069192  | 7.017564095  | -2.875626917 |
| H | 1.155644923  | 7.085752627  | -1.272305235 |
| C | 4.095822471  | 5.555215794  | -2.307936181 |
| H | 3.768877107  | 5.477447978  | -3.354180399 |
| H | 4.786461967  | 6.407427292  | -2.219648295 |
| H | 4.635946480  | 4.633998854  | -2.049638377 |
| B | 2.230353950  | 3.624441209  | -0.708720534 |
| O | 1.987149020  | 4.586763857  | -1.689990448 |
| O | 3.058683749  | 4.118063515  | 0.300067447  |
| O | -2.099470164 | -0.048631087 | 1.411182905  |
| H | -2.502903301 | 1.972382215  | 0.986867333  |
| C | -1.072919694 | 0.789247174  | -1.200451177 |
| H | -1.361287250 | 1.564866788  | -1.933968658 |
| H | -0.286560500 | 0.172600782  | -1.667638307 |
| H | -1.933911159 | 0.136067189  | -0.983452747 |



BORANE MV Z (Intermediate)

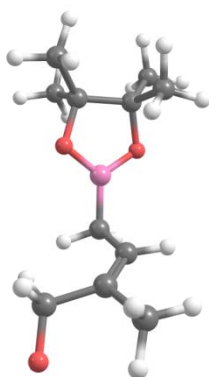

Electronic Energy=-4575.99 kcal/mol

|   |              |              |              |
|---|--------------|--------------|--------------|
| C | -0.722196222 | 1.680702835  | -0.000572045 |
| C | -1.118630143 | 1.188804268  | -1.409441370 |
| H | -1.802666168 | 2.026523179  | -1.809058574 |
| H | -0.202281146 | 1.288764898  | -2.071469260 |
| O | -1.669202187 | -0.039728244 | -1.381349383 |
| C | 0.524690363  | 1.979108197  | 0.431226127  |
| H | 0.672719731  | 2.229037356  | 1.493373258  |
| C | 1.804053800  | 1.990984724  | -0.402688060 |
| H | 2.577670532  | 1.377071811  | 0.094434790  |
| H | 1.592900631  | 1.552951090  | -1.389296935 |
| C | 3.078442621  | 5.534054502  | 0.100823605  |
| C | 2.790226848  | 5.528977624  | -1.447624550 |
| C | 1.948594678  | 6.170093036  | 0.920596009  |
| H | 2.127886684  | 5.962514274  | 1.984941684  |
| H | 1.903826328  | 7.260696905  | 0.779132145  |
| H | 0.977404426  | 5.733496228  | 0.649897186  |
| C | 4.425563668  | 6.128081357  | 0.508156402  |
| H | 4.486578113  | 7.192045445  | 0.229666554  |
| H | 4.542066369  | 6.053507470  | 1.599044800  |
| H | 5.259892576  | 5.591566585  | 0.038968492  |
| C | 1.948056341  | 6.699454595  | -1.953049439 |
| H | 2.461843208  | 7.658575634  | -1.779430343 |
| H | 1.782449326  | 6.589587982  | -3.034357819 |

|   |              |             |              |
|---|--------------|-------------|--------------|
| H | 0.967607673  | 6.725857510 | -1.462307740 |
| C | 4.060767509  | 5.388113384 | -2.297254327 |
| H | 3.764733747  | 5.181036217 | -3.334959153 |
| H | 4.670160156  | 6.304578252 | -2.282595504 |
| H | 4.674673835  | 4.548001506 | -1.944571017 |
| B | 2.307904819  | 3.461056233 | -0.547312154 |
| O | 2.030235271  | 4.299944347 | -1.625429559 |
| O | 3.083137358  | 4.110320207 | 0.421737425  |
| C | -1.874749475 | 1.682304319 | 0.973741243  |
| H | -2.638848913 | 2.419087930 | 0.661156983  |
| H | -2.355281139 | 0.692776560 | 0.934950407  |
| H | -1.560819947 | 1.917589595 | 2.004087991  |

BORANE MV E

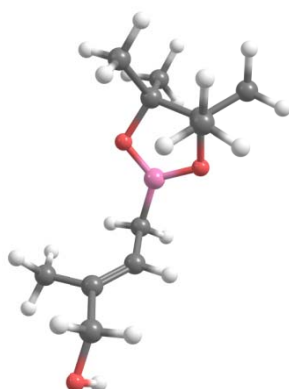

Electronic Energy=-4663.73 kcal/mol

|   |              |             |              |
|---|--------------|-------------|--------------|
| C | -0.575467264 | 1.653655655 | 0.140256118  |
| C | -1.034578344 | 1.630922604 | -1.297423756 |
| H | -1.742561324 | 2.455121583 | -1.477945081 |
| H | -0.192058348 | 1.765188382 | -1.992705640 |
| O | -1.783883368 | 0.435712743 | -1.635595959 |
| C | 0.721413164  | 1.757772858 | 0.499430183  |
| H | 0.938097738  | 1.806997766 | 1.572887971  |
| C | 1.939246018  | 1.876673379 | -0.391483081 |
| H | 2.767741452  | 1.311144365 | 0.064660813  |
| H | 1.760468801  | 1.454283936 | -1.389466877 |

|   |              |              |              |
|---|--------------|--------------|--------------|
| C | 2.935130947  | 5.526402662  | 0.076261472  |
| C | 2.775341730  | 5.438426587  | -1.489923436 |
| C | 1.708855968  | 6.119077618  | 0.777206207  |
| H | 1.811785295  | 5.966973040  | 1.860267625  |
| H | 1.617086795  | 7.197887602  | 0.585528416  |
| H | 0.785078094  | 5.623202276  | 0.448813947  |
| C | 4.208239415  | 6.212114326  | 0.560332648  |
| H | 4.228638158  | 7.264180311  | 0.237638234  |
| H | 4.238806928  | 6.193541022  | 1.658642685  |
| H | 5.107902136  | 5.710245998  | 0.184286585  |
| C | 1.895771754  | 6.516892598  | -2.114349775 |
| H | 2.329931015  | 7.515266215  | -1.952776955 |
| H | 1.823819093  | 6.348844435  | -3.198055293 |
| H | 0.881321852  | 6.501686935  | -1.697936997 |
| C | 4.111563737  | 5.341758569  | -2.231954933 |
| H | 3.916932979  | 5.076971005  | -3.280112196 |
| H | 4.654443685  | 6.297622176  | -2.210947655 |
| H | 4.753090334  | 4.564381200  | -1.794848233 |
| B | 2.364737523  | 3.391883904  | -0.533596891 |
| O | 2.106260667  | 4.138457685  | -1.666598797 |
| O | 2.994696072  | 4.106642904  | 0.467796766  |
| C | -1.673188041 | 1.567080988  | 1.173891706  |
| H | -2.354225164 | 2.431633407  | 1.095962620  |
| H | -2.291713208 | 0.670533363  | 1.018424718  |
| H | -1.265936445 | 1.540206195  | 2.193063690  |
| H | -1.197245240 | -0.318983576 | -1.438624514 |

BORANE MV Z

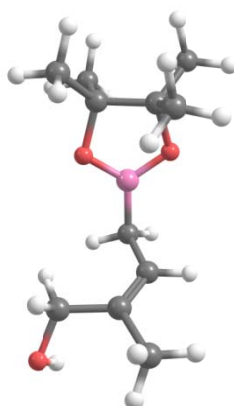

Electronic Energy=-4664.82 kcal/mol

|   |              |             |              |
|---|--------------|-------------|--------------|
| C | -0.517342975 | 1.546819531 | 0.068935982  |
| C | -1.495661872 | 1.477879301 | 1.216821399  |
| H | -0.998919921 | 1.773740242 | 2.156949783  |
| C | 0.782641174  | 1.795048426 | 0.332839676  |
| H | 1.058301952  | 1.943000751 | 1.384340195  |
| C | 1.919265220  | 1.963548614 | -0.645889029 |
| H | 2.773517438  | 1.347146491 | -0.317516668 |
| H | 1.637649513  | 1.635525125 | -1.654726279 |
| C | 3.088340343  | 5.505204584 | 0.128307614  |
| C | 2.739107993  | 5.622271075 | -1.405673592 |
| C | 1.978913856  | 6.029780722 | 1.045753947  |
| H | 2.207365966  | 5.738066617 | 2.079982470  |
| H | 1.904373924  | 7.126095562 | 1.003244979  |
| H | 1.004194377  | 5.600176218 | 0.776562739  |
| C | 4.435922819  | 6.093984380 | 0.533536273  |
| H | 4.456897631  | 7.178611603 | 0.347834939  |
| H | 4.598663585  | 5.930622963 | 1.607930766  |
| H | 5.264065292  | 5.626653731 | -0.012726257 |
| C | 1.820659832  | 6.783509928 | -1.774703243 |
| H | 2.298084379  | 7.747214535 | -1.541431499 |
| H | 1.614429656  | 6.758364090 | -2.853816774 |
| H | 0.863271330  | 6.726005832 | -1.242769091 |
| C | 3.973189208  | 5.607464395 | -2.312757576 |

|   |              |              |              |
|---|--------------|--------------|--------------|
| H | 3.645600091  | 5.488846269  | -3.354502297 |
| H | 4.543588492  | 6.544132010  | -2.233107473 |
| H | 4.638310655  | 4.769173372  | -2.064528241 |
| B | 2.374990005  | 3.476876810  | -0.670982442 |
| O | 2.017232761  | 4.365163677  | -1.665024225 |
| O | 3.139894750  | 4.046528520  | 0.330202057  |
| O | -2.118993767 | 0.177709566  | 1.361467187  |
| H | -2.341187570 | 2.163245982  | 1.048840548  |
| C | -1.104987283 | 1.329545333  | -1.302637536 |
| H | -1.789152474 | 2.155078236  | -1.563558681 |
| H | -0.342640030 | 1.266940374  | -2.087956507 |
| H | -1.705056139 | 0.406965085  | -1.319959348 |
| H | -1.388198590 | -0.466305436 | 1.426678377  |

-----

3,4-AZIRIDINE-1-CYCLOHEXENE A<sub>2</sub> (10)

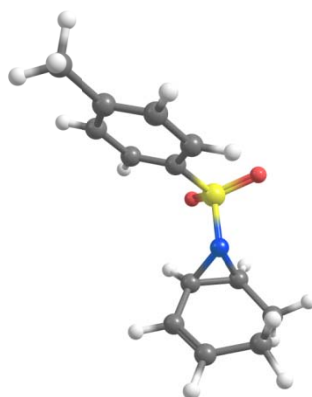

Electronic Energy=-4427.95 kcal/mol

|   |              |              |              |
|---|--------------|--------------|--------------|
| C | -0.102409750 | 0.100033191  | 0.811616652  |
| C | 1.229832270  | 0.646834048  | 0.363572007  |
| C | 1.264451401  | 2.189806975  | 0.318757746  |
| C | 0.593469734  | 2.828025588  | 1.514094465  |
| C | -0.523640151 | 2.096300673  | 2.185896599  |
| C | -0.902919174 | 0.761276437  | 1.663783489  |
| H | 2.301963809  | 2.544585179  | 0.234346167  |
| H | 2.006549567  | 0.291578604  | 1.061091475  |
| H | 1.496318351  | 0.242864544  | -0.624382956 |
| H | -0.402050416 | -0.885290911 | 0.445454382  |
| H | -1.853013421 | 0.334226501  | 1.990501343  |
| H | 0.727784862  | 2.545463209  | -0.576898348 |
| H | -1.291699273 | 2.710541269  | 2.659464642  |
| H | 0.520551744  | 3.919166117  | 1.514992060  |
| S | 1.016365473  | 3.302364244  | 4.124084501  |
| O | 2.389736667  | 3.791069483  | 4.026927257  |
| O | -0.104047677 | 4.251634116  | 4.167667163  |
| C | 0.880636561  | 2.219337310  | 5.541751209  |
| C | 1.932218435  | 1.347865176  | 5.844637811  |
| C | -0.255167848 | 2.284915887  | 6.351152482  |
| C | 1.830713173  | 0.529369094  | 6.967350951  |
| H | 2.816901566  | 1.321296383  | 5.209503950  |
| C | -0.336554717 | 1.461042491  | 7.475416873  |

|   |              |              |             |
|---|--------------|--------------|-------------|
| H | -1.052646494 | 2.984488024  | 6.103971351 |
| C | 0.699420801  | 0.572772107  | 7.801242951 |
| H | 2.647631796  | -0.155285001 | 7.204923856 |
| H | -1.222033209 | 1.512493048  | 8.112271268 |
| C | 0.618894927  | -0.292487284 | 9.036028817 |
| H | 1.115388231  | 0.199423152  | 9.887185723 |
| H | -0.422298893 | -0.481275041 | 9.326813696 |
| H | 1.116550346  | -1.258820208 | 8.881771256 |
| N | 0.843778161  | 2.184619299  | 2.834360883 |

3,4-AZIRIDINE-1-CYCLOHEXENE A<sub>3</sub> (10)

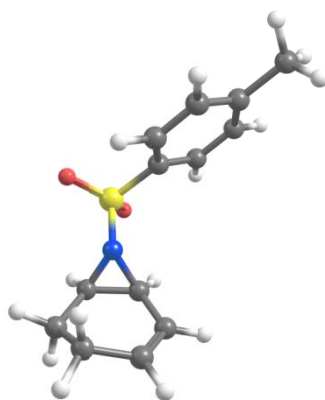

Electronic Energy=-4427.95 kcal/mol

|   |              |              |              |
|---|--------------|--------------|--------------|
| C | -0.608146101 | 0.712575775  | 0.604580403  |
| C | 0.805243971  | 0.668668969  | 0.080176561  |
| C | 1.835040937  | 1.252957521  | 1.071184678  |
| C | 1.356345763  | 2.523861179  | 1.736124081  |
| C | -0.111972509 | 2.719707445  | 1.937590406  |
| C | -1.034528107 | 1.667108705  | 1.448006152  |
| H | 1.085677834  | -0.363450622 | -0.177458241 |
| H | 0.847834970  | 1.242867105  | -0.860318617 |
| H | -1.309343734 | -0.049097246 | 0.253981094  |
| H | -2.068912146 | 1.689965874  | 1.796244472  |
| H | 2.793567312  | 1.431135779  | 0.562346505  |
| H | 2.027712469  | 0.523910916  | 1.876208534  |
| H | -0.408900337 | 3.314343832  | 2.803463588  |

|   |              |             |              |
|---|--------------|-------------|--------------|
| H | 2.006925619  | 2.955401876 | 2.501926903  |
| N | 0.632220210  | 3.492667975 | 0.866682950  |
| S | 0.995718469  | 5.133463316 | 1.210269946  |
| O | 0.844841732  | 5.431756537 | 2.640919821  |
| O | 2.265765074  | 5.393684240 | 0.536818192  |
| C | -0.318483806 | 5.968876128 | 0.328366202  |
| C | -0.312232920 | 5.976815037 | -1.071140591 |
| C | -1.303728009 | 6.647592507 | 1.046964399  |
| C | -1.314764459 | 6.666572326 | -1.748081748 |
| H | 0.476818896  | 5.458687506 | -1.614929582 |
| C | -2.297896375 | 7.338905998 | 0.350576939  |
| H | -1.273373160 | 6.645413789 | 2.135798399  |
| C | -2.323296706 | 7.356912184 | -1.051397663 |
| H | -1.310535144 | 6.679069148 | -2.840108618 |
| H | -3.063285297 | 7.880710667 | 0.909867950  |
| C | -3.412284449 | 8.086985856 | -1.800419761 |
| H | -3.010159808 | 8.615860523 | -2.675053243 |
| H | -4.172919657 | 7.380839405 | -2.168211491 |
| H | -3.920264901 | 8.817761160 | -1.158858446 |



TS ANTI A<sub>2</sub>

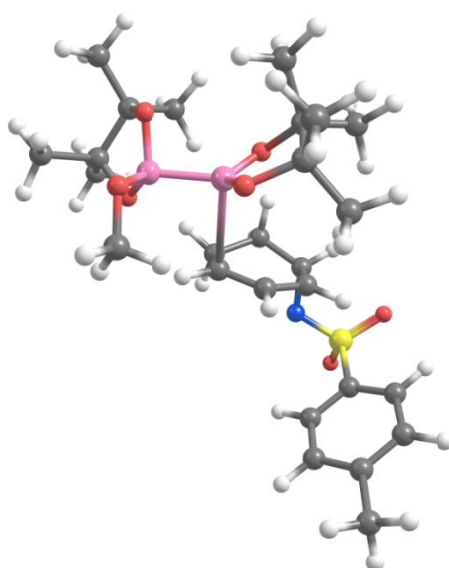

Electronic Energy=-10529.85 kcal/mol

|   |              |              |              |
|---|--------------|--------------|--------------|
| B | -1.083250834 | -1.115102546 | -0.535076838 |
| B | 0.650688880  | -0.524167659 | -0.145730005 |
| C | 0.077289442  | 1.750193284  | -1.506139653 |
| C | 1.423573384  | 2.036738708  | -1.708215601 |
| C | 2.059771545  | 3.031057310  | -0.972849461 |
| N | 1.162912359  | 5.029188436  | -1.004513367 |
| C | 1.356046383  | 3.931126684  | -0.024326243 |
| H | 1.986128795  | 4.233185844  | 0.824899092  |
| C | 0.027240905  | 3.351236575  | 0.466276791  |
| H | -0.581350156 | 4.156266196  | 0.904718184  |
| H | 0.261145396  | 2.627615028  | 1.262886787  |
| C | -0.759552726 | 2.622573019  | -0.632714524 |
| H | -1.223477531 | 3.365072885  | -1.313043710 |
| H | -1.588036260 | 2.021565620  | -0.231539216 |
| H | -0.445359213 | 1.071253046  | -2.177056216 |
| H | 1.987907733  | 1.482286786  | -2.460129306 |
| H | 3.108959124  | 3.261077404  | -1.166805460 |
| S | 2.397380502  | 6.053397565  | -1.213286486 |
| O | 1.828755126  | 7.373574787  | -1.532642820 |
| H | 1.393760085  | 5.581022181  | -3.902099752 |

|   |             |              |              |
|---|-------------|--------------|--------------|
| C | 2.457398585 | 5.341999722  | -3.914833114 |
| O | 3.450073323 | 5.973040905  | -0.171500849 |
| C | 3.213979366 | 5.510076361  | -2.747599152 |
| C | 3.060422959 | 4.835508403  | -5.064269077 |
| H | 2.457640298 | 4.687785566  | -5.964448777 |
| C | 4.571703277 | 5.185762175  | -2.747687353 |
| H | 5.144430334 | 5.317157692  | -1.829185464 |
| C | 5.166656400 | 4.677543429  | -3.908840652 |
| H | 6.227437100 | 4.412367034  | -3.896409565 |
| H | 5.255127328 | 4.727987065  | -7.071759623 |
| C | 5.062979807 | 3.932200438  | -6.334237344 |
| H | 6.023520699 | 3.448097436  | -6.111841515 |
| C | 4.423629189 | 4.487161625  | -5.081052238 |
| H | 4.413005043 | 3.190109716  | -6.820272088 |
| C | 3.144571144 | 0.279619641  | 2.287732758  |
| H | 2.621114915 | 0.569964302  | 3.210015962  |
| H | 3.444166986 | 0.840396306  | -0.518832968 |
| H | 3.358935443 | 1.190898630  | 1.715775869  |
| H | 4.099177876 | -0.191395000 | 2.572284803  |
| H | 4.088716846 | -0.478208588 | -1.524305917 |
| H | 4.812609048 | -0.139901509 | 0.070851566  |
| C | 3.867190935 | -0.170330391 | -0.492189087 |
| C | 2.880974517 | -1.167841061 | 0.120363731  |
| C | 3.510449772 | -2.562695619 | 0.133603630  |
| H | 4.368391873 | -2.604484977 | 0.823808917  |
| H | 3.874413512 | -2.802532502 | -0.876421344 |
| H | 2.780474775 | -3.328780964 | 0.421683249  |
| H | 2.693402613 | -2.442693208 | 2.755414377  |
| C | 1.833266560 | -1.859441470 | 2.391762850  |
| H | 1.296809736 | -1.451994451 | 3.260162294  |
| H | 1.140064189 | -2.520078179 | 1.854694316  |
| O | 1.701264506 | -1.228141455 | -0.742065709 |
| C | 2.272861735 | -0.692905385 | 1.495934930  |

|   |              |              |              |
|---|--------------|--------------|--------------|
| O | 1.048481019  | -0.000363876 | 1.090754019  |
| C | -0.635302091 | -1.597994641 | -2.896787305 |
| H | 0.354225329  | -1.105160731 | -2.933403749 |
| O | -0.922253599 | -2.097180159 | -1.610301344 |
| H | -0.616880441 | -2.444037510 | -3.602588874 |
| O | -1.380676745 | -1.838267240 | 0.717396861  |
| C | -2.512054414 | -1.199145818 | 1.335753518  |
| O | -2.191359997 | -0.156817730 | -0.728881252 |
| C | -2.035568375 | -0.077184587 | 2.274859303  |
| H | -1.314775667 | -0.493700696 | 2.991218570  |
| H | -1.521931922 | 0.710432102  | 1.712080012  |
| H | -2.874121454 | 0.365824496  | 2.835697384  |
| C | -3.280135524 | -0.633673205 | 0.087734882  |
| C | -3.266183994 | -2.256305107 | 2.148437175  |
| H | -2.636807055 | -2.583882008 | 2.989929014  |
| H | -3.498892495 | -3.135951179 | 1.534948623  |
| H | -3.349853401 | -2.586776095 | -0.869966691 |
| H | -4.201865452 | -1.846056290 | 2.562509764  |
| C | -4.027273972 | -1.747021369 | -0.671368981 |
| H | -4.906357423 | -2.108274983 | -0.113560121 |
| H | -4.368192599 | -1.345929817 | -1.636832335 |
| C | -4.233674541 | 0.527781326  | 0.372707927  |
| H | -3.707157557 | 1.383232768  | 0.815550527  |
| H | -4.697106549 | 0.861821967  | -0.568313486 |
| H | -5.040055072 | 0.218007049  | 1.057402641  |
| H | -1.400375368 | -0.875683488 | -3.243893530 |

TS ANTI A<sub>3</sub>

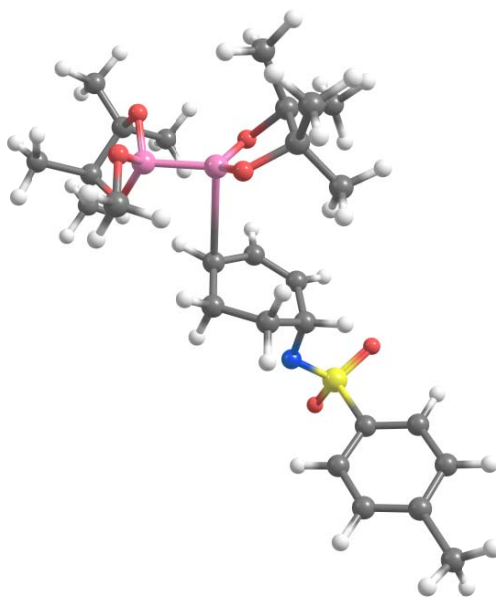

Electronic Energy=-10531.98 kcal/mol

|   |              |              |              |
|---|--------------|--------------|--------------|
| B | -1.135539745 | -1.110479956 | -0.421501992 |
| B | 0.659977919  | -0.673071170 | -0.061933478 |
| C | 0.304297254  | 1.716481794  | -1.375848935 |
| C | 1.011970601  | 2.498370997  | -0.469998142 |
| C | 2.216180007  | 3.106471937  | -0.816331066 |
| N | 2.295853345  | 4.293360672  | -2.641613881 |
| C | 2.821969362  | 2.991638472  | -2.172063941 |
| H | 3.922757898  | 2.942316341  | -2.131618131 |
| H | 2.775283037  | 0.899079422  | -2.640510441 |
| C | 2.269763783  | 1.815370907  | -2.981676260 |
| C | 0.756887632  | 1.629536695  | -2.799375228 |
| H | 0.221233029  | 2.441881988  | -3.329459754 |
| H | 0.601320289  | 2.664128044  | 0.528386011  |
| H | 0.412509975  | 0.690128177  | -3.254077435 |
| H | 2.721063830  | 3.785661702  | -0.128623982 |
| H | -0.697718353 | 1.347147810  | -1.137324726 |
| S | 3.304914726  | 5.543459779  | -2.467572483 |
| O | 4.130345353  | 5.510478441  | -1.235622537 |
| O | 2.558433687  | 6.771754358  | -2.769671142 |
| C | 4.510020751  | 5.367205901  | -3.822742549 |

|   |             |              |              |
|---|-------------|--------------|--------------|
| C | 4.057216397 | 5.243153711  | -5.141862473 |
| H | 2.984762370 | 5.230322000  | -5.339767886 |
| H | 4.617817212 | 5.029944373  | -7.210762125 |
| C | 5.881276117 | 5.367279990  | -3.555206336 |
| H | 6.212951967 | 5.459255888  | -2.520833893 |
| C | 6.795410910 | 5.258787352  | -4.607607760 |
| H | 7.867084257 | 5.262975368  | -4.390136282 |
| H | 7.693389059 | 6.069237016  | -7.375705186 |
| C | 7.356620415 | 5.064489948  | -7.072243846 |
| H | 8.250853520 | 4.495298768  | -6.783064603 |
| H | 6.917562113 | 4.583357543  | -7.956580580 |
| C | 6.361847068 | 5.144091999  | -5.936257599 |
| C | 4.978242718 | 5.131549542  | -6.183601950 |
| C | 3.876258497 | -0.268902239 | -0.171361531 |
| H | 3.423018591 | 0.729026908  | -0.101505141 |
| H | 4.770658821 | -0.294297494 | 0.469913449  |
| H | 4.196012094 | -0.431663647 | -1.210268435 |
| H | 3.941771460 | -0.818485867 | 2.884970608  |
| C | 3.019163191 | -0.283148072 | 2.609213954  |
| H | 3.288527401 | 0.700282396  | 2.204368189  |
| H | 2.429907406 | -0.126585098 | 3.524473411  |
| C | 2.191462408 | -1.093480999 | 1.613647380  |
| C | 2.876670587 | -1.357754032 | 0.222897825  |
| O | 1.017086824 | -0.312673216 | 1.244499448  |
| C | 3.518663567 | -2.736305923 | 0.064775868  |
| H | 3.945535425 | -2.824418790 | -0.945183719 |
| H | 4.332585014 | -2.880495926 | 0.793434467  |
| H | 2.779037503 | -3.536165291 | 0.192674858  |
| H | 2.485568129 | -3.019124217 | 2.633478711  |
| C | 1.666489241 | -2.374383669 | 2.278924972  |
| H | 1.041492758 | -2.091402727 | 3.136967361  |
| H | 1.031340225 | -2.939875216 | 1.584363083  |
| H | 0.401298165 | -1.782518403 | -2.676612285 |

|   |              |              |              |
|---|--------------|--------------|--------------|
| C | -0.649273058 | -2.116055535 | -2.603358286 |
| O | -1.040781280 | -2.309253342 | -1.258660202 |
| H | -0.740726052 | -3.079038496 | -3.131382169 |
| O | -1.643239373 | -1.506504336 | 0.900662975  |
| O | -2.065282418 | -0.067149744 | -0.917060013 |
| C | -1.974138117 | 0.631405051  | 2.020307612  |
| H | -1.319217749 | 1.185488449  | 1.338021915  |
| H | -2.721152176 | 1.323337394  | 2.440710886  |
| H | -1.347544776 | 0.243462265  | 2.833886778  |
| C | -2.638968170 | -0.554333053 | 1.296648209  |
| C | -3.245874899 | -0.129137064 | -0.088436836 |
| C | -3.607674026 | -1.253646456 | 2.255630823  |
| H | -3.071785783 | -1.516132623 | 3.180651375  |
| H | -4.450279782 | -0.595717087 | 2.524155117  |
| H | -3.999337337 | -2.180259534 | 1.816540708  |
| H | -3.695058480 | -2.187786816 | -0.626953528 |
| C | -4.189249870 | -1.208180440 | -0.650240359 |
| H | -4.422651673 | -0.963478649 | -1.696593924 |
| H | -5.134696634 | -1.262659718 | -0.086323428 |
| C | -3.938769414 | 1.234325024  | -0.110284422 |
| H | -3.245868660 | 2.040215865  | 0.164346579  |
| H | -4.317279786 | 1.441082056  | -1.123065353 |
| H | -4.795380575 | 1.253142699  | 0.583390357  |
| H | 2.519796683  | 1.959708217  | -4.042906856 |
| H | -1.291771635 | -1.374893062 | -3.115078939 |
| O | 1.739551413  | -1.293243406 | -0.702549312 |

TS SYN A<sub>2</sub>

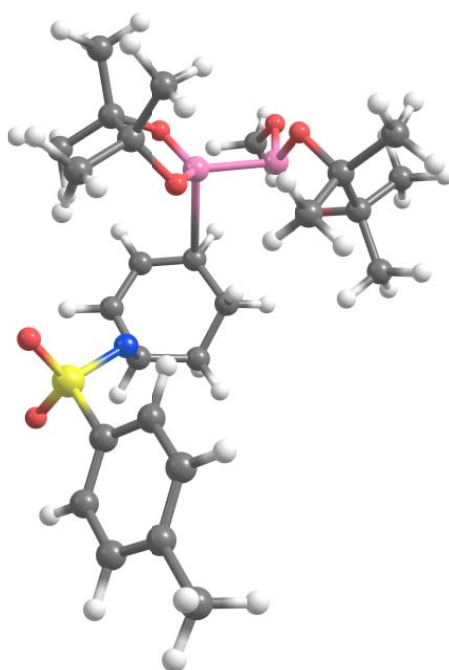

Electronic Energy=-10525.87 kcal/mol

|   |              |              |              |
|---|--------------|--------------|--------------|
| B | 0.674715460  | -0.026998727 | -0.256855231 |
| B | -1.024673116 | -0.901622047 | -0.604862683 |
| C | -0.448268674 | 2.294310566  | -0.703751321 |
| C | 0.741602557  | 3.032999050  | -0.791939042 |
| C | 1.042498358  | 4.056277403  | 0.096397887  |
| N | 0.768128396  | 3.674323269  | 2.268434702  |
| C | 0.123439141  | 4.458275418  | 1.206689606  |
| H | 0.170982862  | 5.544121411  | 1.389303256  |
| C | -1.317020526 | 4.024878968  | 0.925248194  |
| H | -1.921772861 | 4.142615649  | 1.836078148  |
| H | -1.727019529 | 4.712153446  | 0.164162774  |
| H | -1.199411710 | 1.889724751  | 1.236630044  |
| C | -1.417422431 | 2.578981983  | 0.406244878  |
| H | -2.435650323 | 2.336539354  | 0.079261012  |
| S | 1.754682705  | 4.460106156  | 3.265886115  |
| O | 1.967988031  | 5.892482107  | 2.935034538  |
| C | 0.847436690  | 4.457703608  | 4.844067162  |
| O | 2.950380244  | 3.644453210  | 3.542287750  |

|   |              |              |              |
|---|--------------|--------------|--------------|
| C | 0.303964426  | 3.265735955  | 5.346581275  |
| C | 0.726751397  | 5.638191688  | 5.579206957  |
| H | 1.148531848  | 6.556390087  | 5.170031167  |
| H | 0.001690855  | 6.550577475  | 7.396556753  |
| C | 0.082124889  | 5.623363186  | 6.822205972  |
| C | -0.455896239 | 4.441620496  | 7.347320080  |
| C | -1.134695800 | 4.422126434  | 8.699141624  |
| H | -1.177953552 | 5.428631830  | 9.136508250  |
| H | -0.597060870 | 3.772604663  | 9.407756586  |
| H | -2.164614150 | 4.039938869  | 8.629827341  |
| C | -0.339553413 | 3.265137143  | 6.582860575  |
| H | -0.761360686 | 2.331606624  | 6.966045815  |
| H | 0.383627558  | 2.350767141  | 4.759089597  |
| H | -1.033250174 | -0.078745431 | 2.248113202  |
| C | -1.347838219 | -1.087482698 | 2.536573871  |
| H | -0.453367674 | -1.612346291 | 2.898052793  |
| H | -2.073786453 | -1.022801687 | 3.362387475  |
| C | -1.928187033 | -1.858694593 | 1.340496621  |
| O | -0.922844494 | -2.026515356 | 0.321760312  |
| C | -2.359363565 | -3.254449708 | 1.805262798  |
| H | -1.513515633 | -3.743922970 | 2.311144269  |
| C | -3.034067214 | -1.040055685 | 0.576894737  |
| C | -3.934024355 | -0.182724165 | 1.468941237  |
| H | -3.349196031 | 0.555468137  | 2.031688141  |
| H | -4.494798371 | -0.807676499 | 2.182933949  |
| H | -4.662758185 | 0.359120639  | 0.846656430  |
| H | -3.194557606 | -3.191753232 | 2.521898049  |
| C | -3.894801829 | -1.939444208 | -0.328650091 |
| H | -2.659592284 | -3.883555650 | 0.957677429  |
| H | -3.251755574 | -2.560358719 | -0.965842625 |
| H | -4.568121018 | -2.590120435 | 0.252387024  |
| H | -4.506498324 | -1.297402452 | -0.979026966 |
| O | -0.909067378 | -1.391915791 | -1.967812108 |



|   |              |              |              |
|---|--------------|--------------|--------------|
| H | -1.844354824 | 0.215514668  | -2.932923256 |
| C | -0.968999266 | -0.456619108 | -3.021737264 |
| H | -0.050963980 | 0.156367927  | -3.070889193 |
| H | -1.057160888 | -1.010466188 | -3.970289073 |
| H | 2.006561113  | -1.994254714 | 2.445546756  |
| O | 1.173773444  | 0.059366820  | 1.033626479  |
| H | -0.786880783 | 1.723180114  | -1.562762067 |
| C | 2.443253264  | -1.941812843 | 1.438537892  |
| H | 3.434142381  | -2.420790865 | 1.467972156  |
| O | 1.695829836  | -0.231418161 | -1.187275927 |
| H | 1.783011816  | -2.498089542 | 0.760509026  |
| C | 2.542399102  | -0.465495808 | 1.028332265  |
| C | 3.362228046  | 0.314354704  | 2.052701592  |
| H | 2.989310947  | 0.091442883  | 3.062129937  |
| H | 2.001990164  | 4.575339082  | 0.041796856  |
| H | 3.280686536  | 1.398398657  | 1.912866203  |
| H | 4.423125486  | 0.017638345  | 2.011354581  |
| H | 3.147424696  | 1.895483643  | -0.292552119 |
| C | 3.700039646  | 1.055821656  | -0.729381198 |
| H | 4.712496226  | 1.048275755  | -0.298298729 |
| H | 3.786943548  | 1.211803486  | -1.815045582 |
| C | 2.980906609  | -0.270841969 | -0.475673734 |
| C | 3.793223587  | -1.423775629 | -1.068404554 |
| H | 4.744676135  | -1.555391992 | -0.528613328 |
| H | 4.025325591  | -1.202543674 | -2.120906188 |
| H | 3.231331060  | -2.365411571 | -1.034882669 |
| O | -2.246700857 | -0.171935954 | -0.263661262 |
| H | 1.454600300  | 2.791381035  | -1.582665865 |

TS SYN A<sub>3</sub>

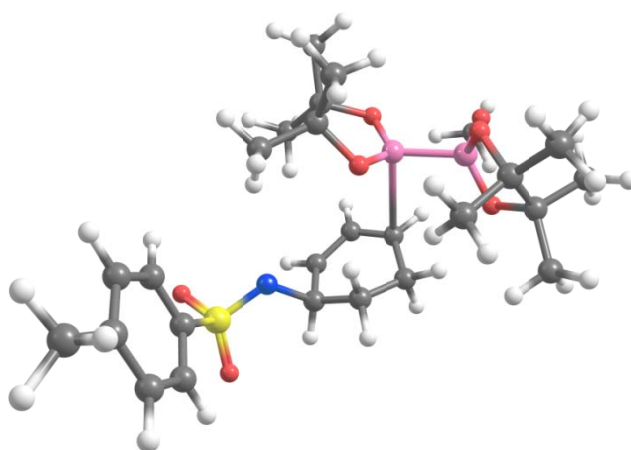

Electronic Energy=-10527.16 kcal/mol

|   |              |              |              |
|---|--------------|--------------|--------------|
| B | -0.996918148 | -1.098006887 | -0.675580860 |
| B | 0.735069475  | -0.498812908 | -0.270978152 |
| C | -0.102951415 | 2.211291706  | -0.579355586 |
| C | 1.133270230  | 2.848996663  | -0.691694149 |
| C | 1.587857108  | 3.676189940  | 0.332039379  |
| N | 2.221504452  | 3.176261063  | 2.425253379  |
| H | -3.458623401 | 0.393661092  | 1.893715259  |
| C | 1.026548084  | 3.662933041  | 1.716552415  |
| C | -0.124956771 | 2.656418494  | 1.895040310  |
| C | -0.959192008 | 2.450776423  | 0.617723108  |
| H | -1.669234101 | 1.617886736  | 0.709637503  |
| H | 1.707120664  | 2.758590697  | -1.616624428 |
| H | -0.543881426 | 1.716393011  | -1.443624876 |
| H | -1.564384327 | 3.357353227  | 0.403911944  |
| H | -0.765281448 | 2.965974457  | 2.734123946  |
| H | 0.329184740  | 1.690992202  | 2.158895615  |
| H | 0.730935168  | 4.677947713  | 2.041073467  |
| H | 2.457971219  | 4.318957206  | 0.181403353  |
| C | -4.027924073 | -0.240671796 | 1.201714566  |
| H | -4.719896690 | -0.866567062 | 1.788646079  |
| H | -4.630105341 | 0.413426950  | 0.552335271  |
| O | -2.160632563 | -0.250168676 | -0.339309451 |

|   |              |              |              |
|---|--------------|--------------|--------------|
| O | -1.092694781 | -2.287282588 | 0.187162319  |
| O | -0.932032960 | -1.542563137 | -2.070850952 |
| O | 1.761258319  | -0.671438639 | -1.200266588 |
| O | 1.229696892  | -0.507022851 | 1.030542796  |
| H | -1.174640921 | -0.409496639 | 2.183489780  |
| H | -2.353803319 | -1.307847750 | 3.190263649  |
| H | 3.859041190  | 0.811212330  | -1.690802669 |
| C | 3.773457398  | 0.561834272  | -0.622805914 |
| H | 3.237776374  | 1.370443198  | -0.111725011 |
| H | 4.788133772  | 0.503051676  | -0.200057367 |
| C | 3.416289174  | -0.412420550 | 2.082177703  |
| H | 3.361535812  | 0.681839695  | 2.020032657  |
| H | 3.030516432  | -0.708147895 | 3.068199183  |
| H | 4.468759399  | -0.734860629 | 2.018468131  |
| C | 2.580923535  | -1.077823549 | 0.992223518  |
| H | -0.761550265 | -2.014949050 | 2.794922679  |
| C | 3.039425521  | -0.773393903 | -0.483681626 |
| C | 3.849698656  | -1.882525849 | -1.156711778 |
| H | 4.095635827  | -1.577228108 | -2.184730001 |
| H | 3.281755744  | -2.819866471 | -1.206955100 |
| H | 4.794585212  | -2.063196435 | -0.619323545 |
| C | 2.423535645  | -2.578419311 | 1.274743256  |
| H | 1.953849676  | -2.701295327 | 2.260417820  |
| H | 3.397455005  | -3.092300667 | 1.286900845  |
| C | -2.750798735 | -3.426131796 | 1.505000922  |
| H | -3.031509824 | -3.991148354 | 0.606935426  |
| H | -2.005072069 | -4.015615013 | 2.059767852  |
| C | -3.929709178 | -1.866745325 | -0.710900446 |
| H | -3.269987068 | -2.493193770 | -1.324529945 |
| H | -4.707426111 | -2.496440959 | -0.249122871 |
| H | -0.906470468 | -1.020058411 | -4.047503966 |
| H | -4.419675838 | -1.135037528 | -1.369707781 |
| C | -0.862747887 | -0.538379060 | -3.057419906 |

|   |              |              |              |
|---|--------------|--------------|--------------|
| H | -1.705711657 | 0.176447861  | -2.981723291 |
| H | 0.086104060  | 0.026970877  | -2.996354851 |
| C | -3.103185072 | -1.104807804 | 0.341887091  |
| C | -2.148346752 | -2.065045821 | 1.138570698  |
| C | -1.584894141 | -1.400641156 | 2.406521600  |
| O | 2.170262177  | 5.384888550  | 3.800319936  |
| S | 3.002625406  | 4.233794678  | 3.367526919  |
| O | 4.358769607  | 4.541431063  | 2.868680578  |
| C | 3.248478763  | 3.195506010  | 4.831293424  |
| C | 2.461152872  | 3.391733775  | 5.969815983  |
| C | 2.636269100  | 2.568750723  | 7.084044363  |
| C | 3.585320348  | 1.533232617  | 7.081529785  |
| C | 4.371262472  | 1.360250192  | 5.931557207  |
| C | 4.213871982  | 2.184049996  | 4.815587885  |
| H | 4.834476751  | 2.050297730  | 3.930485831  |
| H | 5.120516733  | 0.564499783  | 5.909188716  |
| C | 3.740115956  | 0.620518249  | 8.277691955  |
| H | 2.894838952  | -0.081904135 | 8.354171923  |
| H | 4.659626042  | 0.024169614  | 8.208134925  |
| H | 3.774282112  | 1.190148919  | 9.217973252  |
| H | 2.021607684  | 2.732712284  | 7.973458926  |
| H | 1.724690973  | 4.195516329  | 5.969332881  |
| H | 1.768258879  | -3.052779615 | 0.532128835  |
| H | -3.637881422 | -3.307265906 | 2.149007391  |

BORANE ANTI (Intermediate)

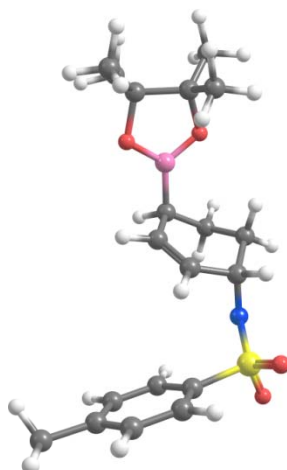

Electronic Energy=-7225.20 kcal/mol

|   |              |              |              |
|---|--------------|--------------|--------------|
| C | 0.913490657  | -0.117109801 | 0.852140445  |
| C | 1.552155659  | 1.083830614  | 0.119628095  |
| C | 0.713361636  | 2.361572619  | 0.275809860  |
| C | 0.566637665  | 2.778663029  | 1.751587225  |
| C | 0.238548499  | 1.572168210  | 2.607035274  |
| C | 0.407851195  | 0.294366604  | 2.229571267  |
| H | 1.182749325  | 3.194303950  | -0.268893945 |
| H | 2.543661302  | 1.278902959  | 0.559050145  |
| H | 1.700628664  | 0.848395126  | -0.947313232 |
| H | 0.169847035  | -0.517059375 | 2.925304188  |
| H | -0.288382512 | 2.195198935  | -0.156230134 |
| H | -0.101060609 | 1.780795878  | 3.626122780  |
| H | -0.279496867 | 3.487342464  | 1.830050780  |
| S | 1.730804394  | 4.381609282  | 3.445390085  |
| O | 2.933640819  | 5.241731840  | 3.489366209  |
| O | 0.415093432  | 5.048235819  | 3.671464432  |
| C | 1.923661054  | 3.338160376  | 4.946856540  |
| C | 2.968604046  | 2.404372490  | 5.006436163  |
| C | 1.017889426  | 3.412480043  | 6.008002162  |
| C | 3.094406878  | 1.557368553  | 6.106063450  |
| H | 3.662071083  | 2.338191549  | 4.166639602  |
| C | 1.147050685  | 2.554178770  | 7.108404561  |

|   |              |              |              |
|---|--------------|--------------|--------------|
| H | 0.207820868  | 4.140719914  | 5.948651383  |
| C | 2.179412969  | 1.609788401  | 7.174857219  |
| H | 3.909786878  | 0.827582719  | 6.133318504  |
| H | 0.425818665  | 2.616977063  | 7.929578837  |
| C | 2.296473378  | 0.652873964  | 8.341296349  |
| H | 3.314553917  | 0.645240075  | 8.760388530  |
| H | 1.601635296  | 0.922932271  | 9.148649877  |
| H | 2.065708030  | -0.381717730 | 8.038161800  |
| N | 1.816286928  | 3.439673550  | 2.189026293  |
| H | 1.681522955  | -0.900373884 | 1.003764850  |
| C | -2.207735499 | -1.104982874 | -1.122499968 |
| C | -1.932376157 | -2.404384030 | -0.268694204 |
| B | -0.307933024 | -0.814039547 | 0.142058892  |
| O | -0.899629036 | -1.963354342 | 0.663234882  |
| O | -0.942135461 | -0.376901226 | -1.013281447 |
| C | -3.121994219 | -2.906397471 | 0.548630451  |
| H | -3.956834159 | -3.202770779 | -0.105385909 |
| H | -2.815365649 | -3.785747970 | 1.133173371  |
| H | -3.474846431 | -2.139936359 | 1.249326426  |
| C | -3.289007884 | -0.201447185 | -0.518704126 |
| H | -3.297851743 | 0.752189045  | -1.064036888 |
| H | -4.287639328 | -0.657184977 | -0.595304528 |
| H | -3.076897875 | 0.017181441  | 0.536745479  |
| C | -2.490173614 | -1.348229477 | -2.603263645 |
| H | -3.410193424 | -1.938330031 | -2.736653838 |
| H | -2.627545061 | -0.381906487 | -3.108641510 |
| H | -1.659244601 | -1.872561905 | -3.091454285 |
| C | -1.331500280 | -3.553618899 | -1.086902731 |
| H | -0.998271998 | -4.340728797 | -0.396248342 |
| H | -2.066857320 | -3.987276012 | -1.781090104 |
| H | -0.460175001 | -3.213206925 | -1.662718240 |

BORANE SYN (Intermediate)

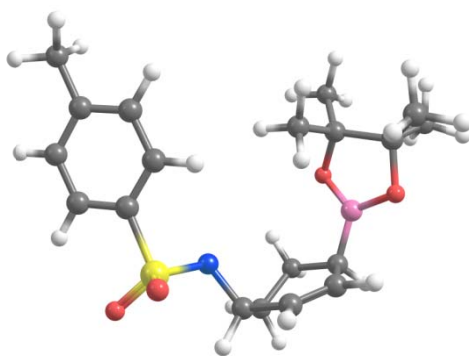

Electronic Energy=-7219.28 kcal/mol

|   |              |              |              |
|---|--------------|--------------|--------------|
| B | 1.084142518  | 0.348131786  | -0.524354972 |
| C | 0.266511454  | 1.468076678  | -1.284571741 |
| C | 1.130814677  | 2.707317439  | -1.058184572 |
| C | 1.722276934  | 3.404894104  | -2.043014026 |
| N | 2.642597936  | 2.311934570  | -4.049494174 |
| C | 1.515594465  | 3.114135935  | -3.513548818 |
| C | 0.173510272  | 2.377485099  | -3.695140314 |
| C | 0.080839707  | 1.140781518  | -2.791943943 |
| H | 0.869727261  | 0.444799022  | -3.109852119 |
| H | -0.881917330 | 0.623635679  | -2.940383645 |
| H | -0.711434259 | 1.632691748  | -0.790739696 |
| H | 1.335026958  | 2.959750084  | -0.012397104 |
| H | 2.422066756  | 4.209169329  | -1.797525712 |
| H | 1.427494644  | 4.084902666  | -4.036740512 |
| H | 0.075457004  | 2.081392704  | -4.750236550 |
| H | -0.645262938 | 3.083285897  | -3.461754085 |
| O | 1.459103621  | 0.456895273  | 0.812509003  |
| O | 1.652936924  | -0.753668256 | -1.141346031 |
| C | 2.813592297  | -1.128837204 | -0.332781825 |
| C | 4.000425088  | -0.365755829 | -0.930464300 |
| H | 3.827929132  | 0.719388918  | -0.896406676 |
| H | 4.095136359  | -0.640569441 | -1.989055684 |
| H | 4.943686043  | -0.599380214 | -0.414803856 |
| H | 3.891324214  | -2.959481421 | 0.135967249  |

|   |             |              |              |
|---|-------------|--------------|--------------|
| C | 3.029940657 | -2.633370547 | -0.467289832 |
| H | 2.144555443 | -3.204626609 | -0.160654340 |
| C | 2.401710922 | -0.624227988 | 1.106692771  |
| C | 1.655032972 | -1.676547509 | 1.931372614  |
| H | 0.822451688 | -2.109337552 | 1.360800295  |
| H | 1.245512821 | -1.199563500 | 2.832782037  |
| H | 2.328293530 | -2.489274448 | 2.244127811  |
| H | 3.163020186 | 0.317424357  | 2.896071878  |
| C | 3.545109375 | -0.020572654 | 1.921723448  |
| H | 3.976254420 | 0.845491285  | 1.404764193  |
| H | 4.341601559 | -0.759525942 | 2.099708111  |
| S | 3.745649694 | 3.153694019  | -4.798412343 |
| O | 3.375266709 | 3.701755793  | -6.140550623 |
| C | 4.955207935 | 1.836455794  | -5.143495306 |
| O | 4.477350200 | 4.154118683  | -3.960463112 |
| H | 5.196205660 | 1.288837169  | -3.080548125 |
| C | 5.532861510 | 1.103759876  | -4.099751385 |
| C | 6.522862386 | 0.158848100  | -4.371091019 |
| H | 6.967954694 | -0.408181094 | -3.547450247 |
| C | 6.968327215 | -0.072133464 | -5.685373163 |
| H | 7.611699098 | -2.132944892 | -5.951288172 |
| C | 8.029281539 | -1.112650637 | -5.974193063 |
| H | 8.840594404 | -1.079410429 | -5.231711925 |
| H | 8.474467663 | -0.962758021 | -6.967691175 |
| C | 6.387998504 | 0.678277906  | -6.716769474 |
| H | 6.723816427 | 0.522573725  | -7.746501981 |
| C | 5.389977690 | 1.624527856  | -6.451858798 |
| H | 4.935058571 | 2.217102023  | -7.246402735 |
| H | 3.242834190 | -2.868105392 | -1.519514968 |



BORANE ANTI

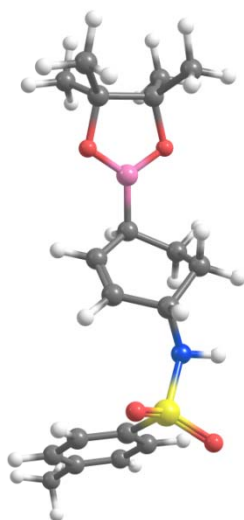

Electronic Energy=-7279.81 kcal/mol

|   |              |              |              |
|---|--------------|--------------|--------------|
| C | 0.130339471  | -0.238546811 | 1.097841630  |
| C | 1.367440905  | 0.545857950  | 0.610691759  |
| C | 0.993661140  | 2.007544596  | 0.337069252  |
| C | 0.515552624  | 2.716218885  | 1.614544759  |
| C | -0.463110456 | 1.853215395  | 2.377720292  |
| C | -0.661813925 | 0.553978347  | 2.107936863  |
| H | 1.839866341  | 2.558645947  | -0.105686527 |
| H | 2.147936458  | 0.519189633  | 1.387131994  |
| H | 1.780505472  | 0.082014173  | -0.295197057 |
| H | -1.447970219 | 0.016729770  | 2.645760305  |
| H | 0.174834904  | 2.053699860  | -0.399642165 |
| H | -1.067401518 | 2.353390353  | 3.136648407  |
| H | 0.002222969  | 3.653158227  | 1.340696225  |
| S | 1.655791116  | 4.190278398  | 3.665258824  |
| O | 2.737271713  | 5.142656419  | 3.399805707  |
| O | 0.265101102  | 4.613755553  | 3.828246995  |
| C | 2.123047655  | 3.296221453  | 5.151804129  |
| C | 3.471451628  | 2.987683291  | 5.368336876  |
| C | 1.157435333  | 2.978339887  | 6.106879873  |
| C | 3.843784485  | 2.348287174  | 6.547534602  |
| H | 4.220165781  | 3.264232259  | 4.626573503  |

|   |              |              |              |
|---|--------------|--------------|--------------|
| C | 1.549661761  | 2.342693239  | 7.288570980  |
| H | 0.116378155  | 3.245215287  | 5.930761229  |
| C | 2.892010793  | 2.018976546  | 7.529697431  |
| H | 4.896261406  | 2.109268127  | 6.715870657  |
| H | 0.795396101  | 2.101629363  | 8.040426942  |
| C | 3.319660635  | 1.362471889  | 8.820857256  |
| H | 3.846779519  | 2.080587297  | 9.467922539  |
| H | 2.458417018  | 0.978533816  | 9.381426351  |
| H | 4.009551120  | 0.527543834  | 8.635080530  |
| N | 1.745073709  | 3.055719179  | 2.414632911  |
| H | 0.486321193  | -1.149929207 | 1.621796034  |
| C | -1.270965924 | -1.669139579 | -2.180245895 |
| C | -2.505080104 | -1.878305260 | -1.179958305 |
| B | -0.755140698 | -0.830484063 | -0.080965377 |
| O | -2.061208825 | -1.238525537 | 0.066298131  |
| O | -0.235725150 | -1.059971076 | -1.336114977 |
| H | 2.485943875  | 3.405315210  | 1.798655852  |
| C | -0.673234071 | -2.960926233 | -2.741002335 |
| H | -1.390684845 | -3.488845634 | -3.385709312 |
| H | 0.209759342  | -2.710750468 | -3.345135625 |
| H | -0.353550283 | -3.639530383 | -1.940730732 |
| C | -1.541392480 | -0.690923067 | -3.325831902 |
| H | -0.608512873 | -0.530958904 | -3.883664663 |
| H | -2.292631174 | -1.089994326 | -4.022701254 |
| H | -1.887625576 | 0.282566708  | -2.957141991 |
| C | -2.799824260 | -3.341295030 | -0.839780806 |
| H | -3.589423473 | -3.376226845 | -0.076862792 |
| H | -3.151112387 | -3.894842789 | -1.722722146 |
| H | -1.915611267 | -3.850208214 | -0.435765183 |
| C | -3.797617425 | -1.180837206 | -1.606514301 |
| H | -4.187286365 | -1.603545313 | -2.544315203 |
| H | -4.556444909 | -1.325183551 | -0.825338130 |
| H | -3.651768161 | -0.102173551 | -1.740475571 |

### BORANE SYN

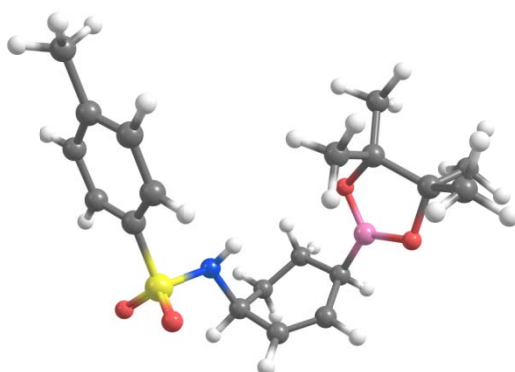

Electronic Energy=-7279.63 kcal/mol

|   |              |              |              |
|---|--------------|--------------|--------------|
| B | 1.281144690  | 0.427046825  | -0.558963735 |
| C | 0.383639551  | 1.469725030  | -1.351951515 |
| C | 1.099714939  | 2.800991080  | -1.239258748 |
| C | 1.565039192  | 3.510475198  | -2.279684930 |
| N | 2.519842883  | 2.267053152  | -4.249404795 |
| C | 1.353508743  | 3.063457245  | -3.708686195 |
| C | 0.080893123  | 2.209566239  | -3.807712065 |
| C | 0.117320145  | 1.035809278  | -2.819317201 |
| H | 0.896655809  | 0.328564000  | -3.141364178 |
| H | -0.828021028 | 0.475727686  | -2.870874328 |
| H | -0.570133161 | 1.570044526  | -0.799660790 |
| H | 1.270536709  | 3.167479169  | -0.222724525 |
| H | 2.126999931  | 4.431275984  | -2.110204113 |
| H | 1.260953531  | 3.933851817  | -4.372618732 |
| H | -0.033390864 | 1.838736338  | -4.836198033 |
| H | -0.775048541 | 2.868998883  | -3.590443817 |
| O | 1.572784836  | 0.544729220  | 0.785587892  |
| O | 1.909278888  | -0.642399778 | -1.167028503 |
| C | 2.904724755  | -1.160216427 | -0.213269749 |
| C | 4.243292126  | -0.528714347 | -0.608032874 |
| H | 4.206972118  | 0.566133586  | -0.521624110 |
| H | 4.459034355  | -0.785399212 | -1.654234800 |
| H | 5.067045980  | -0.902513174 | 0.016671990  |

|   |             |              |              |
|---|-------------|--------------|--------------|
| H | 3.672895777 | -3.111081272 | 0.358677029  |
| C | 2.968718080 | -2.676300065 | -0.366626173 |
| H | 1.985430724 | -3.140712018 | -0.225106985 |
| C | 2.350085771 | -0.645758266 | 1.172365767  |
| C | 1.364519374 | -1.614057639 | 1.830924405  |
| H | 0.579138836 | -1.922585192 | 1.127656992  |
| H | 0.885450571 | -1.108581462 | 2.680180252  |
| H | 1.873866297 | -2.513545960 | 2.205358721  |
| H | 2.940715093 | 0.152100715  | 3.088741616  |
| C | 3.420235145 | -0.213646515 | 2.170347355  |
| H | 4.046539457 | 0.591720439  | 1.767786189  |
| H | 4.066648642 | -1.063079624 | 2.438634454  |
| S | 3.853122552 | 3.207161009  | -4.733817607 |
| O | 3.437457207 | 3.910585473  | -5.946357242 |
| C | 5.013873554 | 1.904138910  | -5.153304484 |
| O | 4.433536909 | 3.970824904  | -3.624024042 |
| H | 5.744553810 | 1.748945741  | -3.128320270 |
| C | 5.823575030 | 1.368988602  | -4.146677326 |
| C | 6.747644537 | 0.376167340  | -4.471639880 |
| H | 7.382823192 | -0.041136739 | -3.687311960 |
| C | 6.891197002 | -0.076759435 | -5.793231235 |
| H | 7.414242973 | -2.150742472 | -6.104303444 |
| C | 7.889407047 | -1.157633035 | -6.133637110 |
| H | 8.723369803 | -1.170995733 | -5.420131748 |
| H | 8.300125609 | -1.021263822 | -7.142394877 |
| C | 6.077972659 | 0.493456683  | -6.787048234 |
| H | 6.190618774 | 0.170021415  | -7.823951669 |
| C | 5.135738070 | 1.474934150  | -6.476769850 |
| H | 4.513338778 | 1.926507995  | -7.248532570 |
| H | 3.323119236 | -2.925766087 | -1.376408744 |
| H | 2.861512318 | 1.631478989  | -3.515050299 |

2-METHYL-2-VINYLAZIRIDINE R (11)

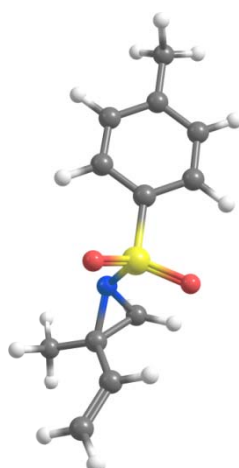

Electronic Energy=-4220.29 kcal/mol

|   |              |              |              |
|---|--------------|--------------|--------------|
| C | 1.161295827  | -2.695437226 | -0.352280438 |
| C | 1.408758580  | -1.444038859 | 0.449135322  |
| H | 1.199175770  | -2.598789442 | -1.440380423 |
| H | 1.445098087  | -3.667265026 | 0.058290054  |
| C | 1.730150298  | -0.209894983 | -0.319219860 |
| H | 1.302456417  | -0.152708334 | -1.323174991 |
| C | 2.499889836  | 0.789728287  | 0.128853447  |
| H | 2.945061684  | 0.786585632  | 1.124927109  |
| H | 2.707176231  | 1.654034289  | -0.502096821 |
| C | 1.957714655  | -1.573751942 | 1.853211122  |
| H | 3.057747472  | -1.569740326 | 1.836010213  |
| H | 1.615005195  | -0.739926877 | 2.481267846  |
| H | 1.614693952  | -2.511465768 | 2.307458446  |
| N | 0.023404337  | -2.056777990 | 0.331001233  |
| S | -1.188165652 | -1.306447629 | -0.626688046 |
| C | -2.477145402 | -2.546497053 | -0.516787854 |
| C | -2.815363869 | -3.285508272 | -1.651144852 |
| C | -3.168473311 | -2.719034619 | 0.687963629  |
| C | -3.857987135 | -4.212062063 | -1.573308621 |
| H | -2.275086672 | -3.119020245 | -2.582074981 |
| C | -4.201352126 | -3.650721127 | 0.748260961  |
| H | -2.900607725 | -2.121787493 | 1.558951251  |

|   |              |              |              |
|---|--------------|--------------|--------------|
| C | -4.565830603 | -4.409523904 | -0.379315106 |
| H | -4.128050183 | -4.787920337 | -2.460752618 |
| H | -4.741831460 | -3.788967203 | 1.687142892  |
| C | -5.712290354 | -5.389310619 | -0.307320110 |
| H | -6.677318441 | -4.859207752 | -0.314081769 |
| H | -5.705722059 | -6.078324409 | -1.160880340 |
| H | -5.674730063 | -5.982342192 | 0.616571202  |
| O | -0.793118227 | -1.212535810 | -2.039008688 |
| O | -1.609364007 | -0.123194362 | 0.114993655  |

2-METHYL-2-VINYLAZIRIDINE R' (11)

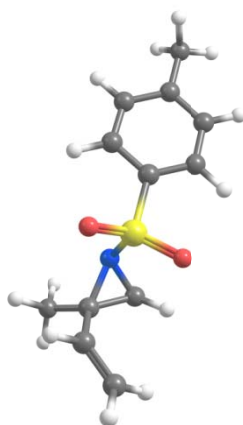

Electronic Energy=-4218.26 kcal/mol

|   |             |              |              |
|---|-------------|--------------|--------------|
| C | 1.254727311 | -2.519241526 | -0.533573659 |
| C | 1.349184796 | -1.393248448 | 0.443522069  |
| H | 1.269368309 | -2.262382606 | -1.595487848 |
| H | 1.627715127 | -3.511764551 | -0.270029472 |
| C | 1.546202584 | 0.009146104  | -0.043534862 |
| H | 1.074320352 | 0.781879086  | 0.570953432  |
| C | 2.280152438 | 0.357312492  | -1.103420465 |
| H | 2.768620108 | -0.385150492 | -1.737936440 |
| H | 2.406861907 | 1.405124904  | -1.377912138 |
| C | 1.882745779 | -1.648065265 | 1.841776306  |
| H | 2.974263992 | -1.509791641 | 1.862386099  |
| H | 1.433759166 | -0.941205760 | 2.554144923  |
| H | 1.639603609 | -2.668395959 | 2.165725325  |

|   |              |              |              |
|---|--------------|--------------|--------------|
| N | 0.039681882  | -2.112310774 | 0.216293063  |
| S | -1.218179509 | -1.322746937 | -0.650937770 |
| C | -2.509289326 | -2.560097114 | -0.516672259 |
| C | -2.847738401 | -3.325651723 | -1.632932655 |
| C | -3.194667417 | -2.711441453 | 0.693804413  |
| C | -3.884261288 | -4.256960152 | -1.530565112 |
| H | -2.313355034 | -3.176213972 | -2.570248570 |
| C | -4.222842627 | -3.646366874 | 0.778795437  |
| H | -2.927032839 | -2.092921342 | 1.549714176  |
| C | -4.586698643 | -4.432383198 | -0.329915002 |
| H | -4.154614988 | -4.853790445 | -2.404023097 |
| H | -4.759735385 | -3.765702812 | 1.722406941  |
| C | -5.725660151 | -5.418611497 | -0.229539983 |
| H | -6.693577468 | -4.894763097 | -0.201858716 |
| H | -5.741342132 | -6.102843827 | -1.086835232 |
| H | -5.655311237 | -6.017774091 | 0.688795978  |
| O | -0.896309472 | -1.177779573 | -2.073703058 |
| O | -1.603527420 | -0.171930267 | 0.165030335  |

TS ANTI R

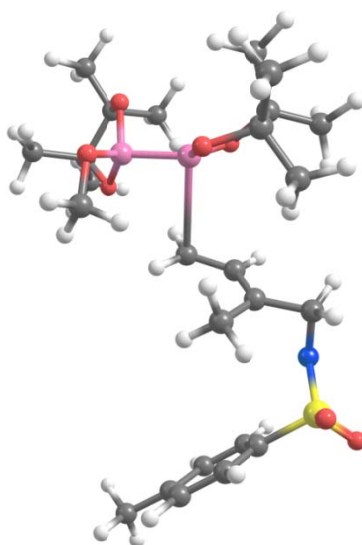

Electronic Energy=-10326.58 kcal/mol

|   |              |              |              |
|---|--------------|--------------|--------------|
| B | -1.104988423 | -1.259858568 | -0.463728342 |
|---|--------------|--------------|--------------|

|   |              |              |              |
|---|--------------|--------------|--------------|
| B | 0.665448620  | -0.929281116 | -0.041399741 |
| C | 0.254330016  | 1.612621710  | -1.129957821 |
| C | 1.476344033  | 2.213135476  | -0.930578503 |
| C | 2.535074647  | 2.189834979  | -1.861238411 |
| N | 3.637591666  | 4.147107571  | -1.926761176 |
| C | 3.860048357  | 2.762423376  | -1.480370098 |
| H | 4.699681779  | 2.256131601  | -1.978988982 |
| H | -0.524734186 | 1.592673936  | -0.372126957 |
| H | 1.692311339  | 2.645970385  | 0.050832348  |
| S | 4.324001499  | 4.587922251  | -3.324827249 |
| O | 5.082635718  | 5.829974042  | -3.083146202 |
| H | 2.228375482  | 6.551434556  | -2.940836564 |
| C | 2.065890175  | 6.098367454  | -3.918760927 |
| O | 5.015469107  | 3.497832299  | -4.057532231 |
| C | 2.938749890  | 5.097755167  | -4.368367361 |
| C | 0.998715814  | 6.493792814  | -4.720329766 |
| H | 0.317877285  | 7.269723665  | -4.360309747 |
| C | 2.740794483  | 4.508033826  | -5.617016892 |
| H | 3.433167465  | 3.736269489  | -5.953098677 |
| C | 1.664976877  | 4.916659471  | -6.414372508 |
| H | 1.513019655  | 4.449319177  | -7.390827977 |
| H | -0.333084977 | 7.409020685  | -7.090360411 |
| C | -0.394043372 | 6.340439231  | -6.834541524 |
| H | -0.432451885 | 5.771340660  | -7.771895164 |
| C | 0.776995259  | 5.908754836  | -5.981272343 |
| H | -1.349887088 | 6.185297477  | -6.308498165 |
| C | 3.271018254  | -0.284828567 | 2.314471321  |
| H | 2.792926827  | 0.029009918  | 3.253653304  |
| H | 3.431589114  | 0.284996984  | -0.522052768 |
| H | 3.510214776  | 0.615863054  | 1.735841270  |
| H | 4.210707263  | -0.802253956 | 2.565620991  |
| H | 4.027992631  | -1.049339711 | -1.535446063 |
| H | 4.808331040  | -0.707890166 | 0.031178461  |



|   |              |              |              |
|---|--------------|--------------|--------------|
| C | 3.844448698  | -0.731252286 | -0.499499880 |
| C | 2.857531419  | -1.700889742 | 0.150621005  |
| C | 3.439131715  | -3.115191576 | 0.130063758  |
| H | 4.330998664  | -3.185989085 | 0.773359196  |
| H | 3.741152456  | -3.363182736 | -0.898036293 |
| H | 2.701808713  | -3.858781211 | 0.455917888  |
| H | 2.705205980  | -2.984368284 | 2.781885572  |
| C | 1.861189825  | -2.358644881 | 2.452703740  |
| H | 1.373913111  | -1.934341610 | 3.341735884  |
| H | 1.123294403  | -2.984213006 | 1.933186695  |
| O | 1.642296587  | -1.709104479 | -0.663472425 |
| C | 2.325091803  | -1.208734931 | 1.549157831  |
| O | 1.127954086  | -0.448067291 | 1.190065559  |
| C | -0.751422351 | -1.526522201 | -2.875955408 |
| H | 0.256444086  | -1.065853235 | -2.851848466 |
| O | -1.077892132 | -2.128803662 | -1.647102590 |
| H | -0.748079207 | -2.303670247 | -3.657230480 |
| O | -1.523745122 | -2.075017498 | 0.698862620  |
| C | -2.577755764 | -1.371849332 | 1.379428639  |
| O | -2.054995516 | -0.130527674 | -0.530734409 |
| C | -1.975709103 | -0.474436764 | 2.474761035  |
| H | -1.366728543 | -1.096782393 | 3.145251571  |
| H | -1.316304032 | 0.283601660  | 2.036311770  |
| H | -2.757765189 | 0.022074856  | 3.071388156  |
| C | -3.218422134 | -0.533127855 | 0.214149382  |
| C | -3.505850448 | -2.408688546 | 2.022382818  |
| H | -2.962242836 | -2.943082835 | 2.816433102  |
| H | -3.844706844 | -3.148451663 | 1.285866527  |
| H | -3.581717038 | -2.308909447 | -0.992656773 |
| H | -4.386069646 | -1.925174533 | 2.477779322  |
| C | -4.118263964 | -1.402225641 | -0.685787078 |
| H | -5.057767827 | -1.684463879 | -0.183412313 |
| H | -4.366619769 | -0.828830304 | -1.590706173 |

|   |              |              |              |
|---|--------------|--------------|--------------|
| C | -3.975600953 | 0.723779051  | 0.646204619  |
| H | -3.317434414 | 1.417765248  | 1.185412307  |
| H | -4.359393501 | 1.242252443  | -0.245920362 |
| H | -4.833842184 | 0.472794907  | 1.290849446  |
| H | -1.479348616 | -0.742375725 | -3.161452519 |
| H | 4.024420281  | 2.759459800  | -0.392367013 |
| C | 2.369685801  | 1.595212576  | -3.223111356 |
| H | 1.445272978  | 1.928659884  | -3.717025812 |
| H | 3.230102240  | 1.826694659  | -3.861760740 |
| H | 2.296353976  | 0.496723614  | -3.116581110 |
| H | -0.033315689 | 1.215994615  | -2.102455518 |

TS ANTI R'

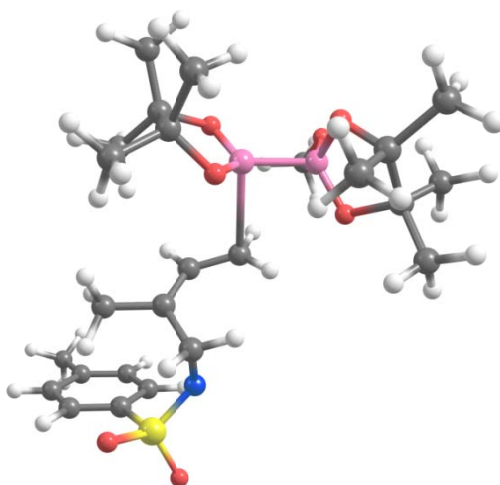

Electronic Energy=-10323.63 kcal/mol

|   |              |              |              |
|---|--------------|--------------|--------------|
| B | -1.114954956 | -1.161377592 | -0.548944138 |
| B | 0.641776326  | -0.781735689 | -0.082544492 |
| C | 0.361731007  | 1.469457834  | -1.446668265 |
| C | 1.575989545  | 2.103983672  | -1.285495215 |
| C | 1.891238379  | 3.083489724  | -0.320912728 |
| N | 0.725230334  | 4.934130169  | -0.617875841 |
| C | 0.860935224  | 3.874982749  | 0.408048614  |
| H | 1.206247276  | 4.237597349  | 1.387484284  |
| H | 0.204101649  | 0.827230626  | -2.306759109 |

|   |             |              |              |
|---|-------------|--------------|--------------|
| H | 2.396445718 | 1.799436174  | -1.944555183 |
| S | 1.561854665 | 6.303419493  | -0.443492711 |
| O | 0.666380660 | 7.423824469  | -0.781205252 |
| H | 1.329566572 | 5.709154010  | -3.280994450 |
| C | 2.375484432 | 5.951642708  | -3.092385413 |
| O | 2.354091498 | 6.413970756  | 0.808447031  |
| C | 2.781605204 | 6.279563532  | -1.791732692 |
| C | 3.315085823 | 5.908359215  | -4.121202416 |
| H | 2.991737949 | 5.637683400  | -5.129982196 |
| C | 4.123815972 | 6.568532711  | -1.536348416 |
| H | 4.426876776 | 6.815928200  | -0.518733669 |
| C | 5.058051842 | 6.520580243  | -2.577616742 |
| H | 6.109223848 | 6.734842242  | -2.365635436 |
| H | 5.678426073 | 7.081248400  | -5.587594453 |
| C | 5.681613205 | 6.142983147  | -5.009501949 |
| H | 6.701212102 | 5.995539463  | -4.628125652 |
| C | 4.673013050 | 6.187970124  | -3.883187720 |
| H | 5.460403959 | 5.327936399  | -5.713090955 |
| C | 3.105944425 | -0.097528085 | 2.412806146  |
| H | 2.572515034 | 0.245100195  | 3.311044041  |
| H | 3.420889334 | 0.422067520  | -0.421016022 |
| H | 3.392102492 | 0.786860423  | 1.831319115  |
| H | 4.020826786 | -0.619572277 | 2.736315254  |
| H | 4.050707346 | -0.928837867 | -1.389574201 |
| H | 4.770548282 | -0.567884920 | 0.204107906  |
| C | 3.829215591 | -0.593801344 | -0.366043201 |
| C | 2.811731594 | -1.554447009 | 0.256026686  |
| C | 3.395310477 | -2.966244974 | 0.309187765  |
| H | 4.250525105 | -3.015832569 | 1.002359384  |
| H | 3.750577039 | -3.247490245 | -0.693020987 |
| H | 2.640445127 | -3.698825892 | 0.619772874  |
| H | 2.501155022 | -2.777391272 | 2.903262959  |
| C | 1.680042428 | -2.156193314 | 2.513354899  |

|   |              |              |              |
|---|--------------|--------------|--------------|
| H | 1.151326895  | -1.705830118 | 3.365093143  |
| H | 0.964542205  | -2.788723190 | 1.971720597  |
| O | 1.647186714  | -1.584894024 | -0.627519762 |
| C | 2.199936582  | -1.029497512 | 1.609872275  |
| O | 1.033112943  | -0.273169570 | 1.161838457  |
| C | -0.744905299 | -1.388221090 | -2.992406319 |
| H | 0.334887624  | -1.144343941 | -3.019611008 |
| O | -1.115094146 | -1.974519568 | -1.769838423 |
| H | -0.942554548 | -2.111724190 | -3.800648940 |
| O | -1.480776003 | -2.062763613 | 0.562209328  |
| C | -2.569622513 | -1.473233736 | 1.294321858  |
| O | -2.068190140 | -0.038500744 | -0.500347827 |
| C | -2.014128356 | -0.721948864 | 2.515522293  |
| H | -1.422829272 | -1.426145716 | 3.118251652  |
| H | -1.348255458 | 0.090726988  | 2.202782879  |
| H | -2.819903894 | -0.316424519 | 3.147831874  |
| C | -3.217119020 | -0.505451207 | 0.231045047  |
| C | -3.481863311 | -2.612126839 | 1.768355094  |
| H | -2.935914663 | -3.239121399 | 2.489785280  |
| H | -3.786663230 | -3.249421028 | 0.928461360  |
| H | -3.631588406 | -2.116092354 | -1.175109505 |
| H | -4.383224393 | -2.220633670 | 2.268440749  |
| C | -4.150466395 | -1.251852142 | -0.741238054 |
| H | -5.079635436 | -1.588025636 | -0.253084887 |
| H | -4.415808948 | -0.566729312 | -1.559602130 |
| C | -3.946260214 | 0.702674028  | 0.822822949  |
| H | -3.266782239 | 1.321767224  | 1.422743827  |
| H | -4.346517360 | 1.325892355  | 0.008922559  |
| H | -4.790518399 | 0.385314724  | 1.456997362  |
| H | -1.319897653 | -0.466537807 | -3.210195628 |
| H | -0.102698756 | 3.364494099  | 0.520183087  |
| C | 3.328629609  | 3.401289140  | -0.052652874 |
| H | 3.959127462  | 3.278252215  | -0.944878164 |

|   |              |             |              |
|---|--------------|-------------|--------------|
| H | 3.458985144  | 4.405564044 | 0.368908272  |
| H | 3.692784569  | 2.685596058 | 0.708621257  |
| H | -0.525540458 | 1.701113512 | -0.860335882 |

TS SYN R

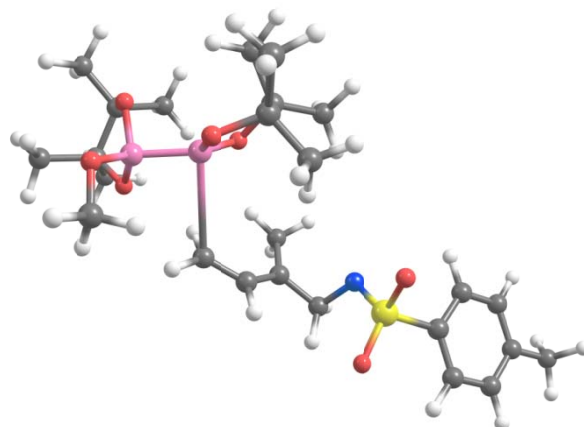

Electronic Energy=-10325.18 kcal/mol

|   |              |              |              |
|---|--------------|--------------|--------------|
| B | 1.967907572  | 3.859426459  | -1.465376906 |
| B | 0.665325335  | 2.756010095  | -0.809785780 |
| C | 2.693167738  | 0.644963606  | -1.048913719 |
| C | 2.374129601  | -0.636400575 | -0.643085222 |
| N | 0.809796930  | -2.580507881 | 1.169619672  |
| C | 2.397645215  | -1.082321359 | 0.688848599  |
| C | 2.264337809  | -2.544673419 | 1.006812946  |
| H | 2.634241614  | -3.179482647 | 0.185979600  |
| H | 2.786203275  | -2.813268974 | 1.942390072  |
| C | 2.503687911  | -0.162272768 | 1.855923874  |
| H | 1.675126496  | -0.390493939 | 2.545938356  |
| H | 2.453146523  | 0.897716437  | 1.587126034  |
| H | 3.437314495  | -0.374235634 | 2.410020033  |
| H | 2.167469418  | -1.395969025 | -1.404407165 |
| H | 2.803879381  | 0.857822706  | -2.109728848 |
| H | 3.017054075  | 1.438104543  | -0.378237526 |
| H | -1.106613770 | 0.616853349  | 1.687423596  |
| C | -1.435376648 | 1.646531068  | 1.871284691  |

|   |              |             |              |
|---|--------------|-------------|--------------|
| H | -2.529241322 | 1.647641503 | 2.005679312  |
| H | -0.980080533 | 1.998856036 | 2.808782317  |
| C | -1.038972010 | 2.582120445 | 0.732809166  |
| O | -0.484912150 | 2.590585985 | -1.568900410 |
| C | -1.576573396 | 2.167936545 | -0.686700115 |
| O | 0.418746371  | 2.520821184 | 0.548992813  |
| C | 2.081803611  | 2.845389934 | -3.705353589 |
| H | 1.872321586  | 3.086677247 | -4.759845150 |
| H | 1.457735556  | 1.973430080 | -3.425975577 |
| C | -1.367771645 | 4.036070809 | 1.100654199  |
| H | -2.447394292 | 4.181819042 | 1.258522915  |
| H | -1.015860832 | 4.723264918 | 0.319225653  |
| H | -0.843936437 | 4.290907187 | 2.032956504  |
| H | -3.112131939 | 2.564026775 | -2.148252018 |
| H | -3.682933519 | 2.702879273 | -0.465664511 |
| C | -2.836158560 | 2.907612785 | -1.140746004 |
| H | -2.667609873 | 3.991432061 | -1.186170883 |
| H | -1.913961228 | 0.437024322 | -1.919554804 |
| H | -2.628683740 | 0.291533288 | -0.296627932 |
| C | -1.756100064 | 0.658943013 | -0.855076231 |
| H | -0.875318262 | 0.100083574 | -0.517930394 |
| H | 3.146809720  | 2.548914163 | -3.620553499 |
| O | 1.779926491  | 3.970491247 | -2.918787505 |
| O | 1.543467116  | 5.143434072 | -0.857019156 |
| O | 3.360410420  | 3.640508058 | -1.012908438 |
| C | 2.603172148  | 5.618947029 | -0.010605322 |
| C | 3.870238794  | 4.938666510 | -0.647897352 |
| C | 2.362526144  | 5.151394359 | 1.435634563  |
| H | 1.371229682  | 5.498977272 | 1.758507663  |
| H | 2.367991554  | 4.056816478 | 1.494428676  |
| H | 3.116331570  | 5.561251783 | 2.127039703  |
| C | 5.057380888  | 4.759780232 | 0.300195721  |
| H | 4.791328130  | 4.131010778 | 1.159978926  |

|   |              |              |              |
|---|--------------|--------------|--------------|
| H | 5.887275776  | 4.274560755  | -0.236098394 |
| H | 5.415791592  | 5.734570465  | 0.670694963  |
| C | 4.330715401  | 5.671703386  | -1.922688469 |
| C | 2.588300713  | 7.151813185  | -0.058966253 |
| H | 1.658538312  | 7.519345206  | 0.401791150  |
| H | 3.484624368  | 5.804402937  | -2.608402792 |
| H | 2.618641438  | 7.514467610  | -1.094337250 |
| H | 4.777293942  | 6.653487672  | -1.696159525 |
| H | 3.437878540  | 7.579522564  | 0.498894451  |
| H | -1.261177811 | -3.780043341 | 2.787723836  |
| S | 0.010840923  | -3.603464138 | 0.201989038  |
| O | -1.325314095 | -3.061964523 | -0.082511208 |
| O | 0.806504817  | -4.149323819 | -0.924334760 |
| C | -0.293643103 | -5.014436197 | 1.309021600  |
| C | -0.950138488 | -4.792079086 | 2.528372696  |
| H | 0.629714529  | -6.460465035 | 0.017233104  |
| C | 0.121469318  | -6.302857782 | 0.968927526  |
| C | -1.183755146 | -5.855810122 | 3.395135576  |
| H | -1.688458252 | -5.670396252 | 4.347406380  |
| C | -0.125798594 | -7.366851260 | 1.846709820  |
| C | -0.776180863 | -7.163580795 | 3.070449929  |
| H | 0.196067621  | -8.375223844 | 1.572124153  |
| C | -1.046976622 | -8.308662384 | 4.020492775  |
| H | -2.125918683 | -8.516728908 | 4.098557871  |
| H | -0.552337483 | -9.230821359 | 3.687705841  |
| H | -0.689049406 | -8.079544092 | 5.035600174  |
| H | 5.086774597  | 5.053419290  | -2.428138459 |

TS SYN R'

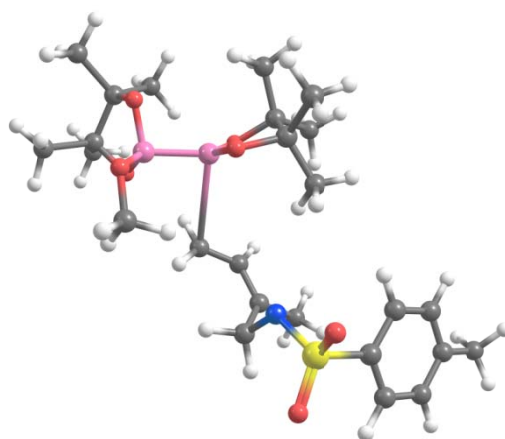

Electronic Energy=-10321.75 kcal/mol

|   |              |              |              |
|---|--------------|--------------|--------------|
| B | -1.162425466 | -1.364321425 | -0.450927868 |
| B | 0.546797961  | -1.136279095 | 0.148441883  |
| C | 0.605808411  | 1.275302576  | -1.617810038 |
| C | 1.769674271  | 2.004052768  | -1.480065920 |
| C | 2.733867156  | 2.219275782  | -2.485659294 |
| N | 3.546585463  | 0.333221267  | -3.440458893 |
| C | 2.714434637  | 1.494836394  | -3.795828763 |
| H | 3.126311706  | 2.107085285  | -4.617087648 |
| H | -0.173276868 | 1.266490756  | -0.857152652 |
| H | 1.945324874  | 2.506390083  | -0.522388452 |
| S | 4.859929235  | 0.073716835  | -4.339823563 |
| O | 5.220308002  | -1.342092495 | -4.163982551 |
| H | 6.099748648  | -0.057329974 | -1.704753702 |
| C | 6.626350073  | 0.714240635  | -2.266696853 |
| O | 4.769266773  | 0.617232276  | -5.717718049 |
| C | 6.245441740  | 0.982393141  | -3.589570907 |
| C | 7.662826159  | 1.439920948  | -1.682546148 |
| C | 6.923264364  | 1.961800929  | -4.319854119 |
| H | 6.624596833  | 2.141047710  | -5.352828840 |
| C | 7.965734306  | 2.680485863  | -3.724922209 |
| H | 8.493589609  | 3.441632315  | -4.306033985 |
| H | 10.071398268 | 2.639462015  | -1.094051124 |



|   |              |              |              |
|---|--------------|--------------|--------------|
| C | 9.433642754  | 3.259716781  | -1.739369324 |
| H | 10.073651781 | 3.746995960  | -2.486905361 |
| C | 8.345285303  | 2.442160932  | -2.397417662 |
| H | 9.004881990  | 4.052898606  | -1.105473248 |
| C | 2.884983387  | -0.096191437 | 2.647535631  |
| H | 2.312496713  | 0.410598819  | 3.438599348  |
| H | 3.302829326  | -0.053589039 | -0.255043199 |
| H | 3.256700491  | 0.662992894  | 1.948561688  |
| H | 3.747417213  | -0.595612136 | 3.117541786  |
| H | 3.929297502  | -1.543405396 | -0.958884321 |
| C | 3.693101062  | -1.048805299 | -0.007782519 |
| C | 2.653863457  | -1.880576831 | 0.745862870  |
| C | 3.225999280  | -3.255226616 | 1.088170538  |
| H | 4.039206599  | -3.170053352 | 1.827195841  |
| H | 3.639945416  | -3.708579585 | 0.176430220  |
| H | 2.452862048  | -3.926104178 | 1.483251164  |
| H | 2.103237011  | -2.618430315 | 3.536058894  |
| C | 1.345181406  | -2.051890962 | 2.973449871  |
| H | 0.759010022  | -1.452436516 | 3.684222754  |
| H | 0.660864900  | -2.754724848 | 2.479142545  |
| O | 1.514997568  | -2.079687744 | -0.155988638 |
| C | 1.989353526  | -1.112899536 | 1.944741277  |
| O | 0.894750123  | -0.390556982 | 1.283727675  |
| C | -0.611688643 | -1.645152372 | -2.838806266 |
| H | 0.450294167  | -1.361294867 | -2.712918013 |
| O | -1.143533823 | -2.194951821 | -1.657114640 |
| H | -0.665656945 | -2.404507005 | -3.633984739 |
| O | -1.735862407 | -2.180875728 | 0.643369998  |
| C | -2.812684878 | -1.450119370 | 1.251443383  |
| O | -1.977054773 | -0.129581458 | -0.506704139 |
| C | -2.288441539 | -0.729621838 | 2.505616753  |
| H | -1.842322090 | -1.479444654 | 3.174858933  |
| H | -1.505924204 | -0.009442556 | 2.237625116  |

|   |              |              |              |
|---|--------------|--------------|--------------|
| H | -3.094976208 | -0.214249189 | 3.051782371  |
| C | -3.238055315 | -0.446211361 | 0.113237276  |
| C | -3.893502989 | -2.460939388 | 1.658143899  |
| H | -3.493625068 | -3.124262813 | 2.440222751  |
| H | -4.190966053 | -3.085226242 | 0.806007540  |
| H | -3.681520879 | -2.039952902 | -1.302566946 |
| H | -4.785709030 | -1.953759338 | 2.062237832  |
| C | -4.145123736 | -1.114605239 | -0.937383834 |
| H | -5.148465980 | -1.339033878 | -0.540267018 |
| H | -4.253308197 | -0.427907177 | -1.789588364 |
| C | -3.886368899 | 0.848416747  | 0.608576245  |
| H | -3.204491750 | 1.408535352  | 1.261837191  |
| H | -4.139215898 | 1.486704837  | -0.251794908 |
| H | -4.816568532 | 0.638279510  | 1.162365252  |
| H | -1.175864138 | -0.749929872 | -3.169836554 |
| H | 1.704747215  | 1.172062908  | -4.094544003 |
| C | 3.829622214  | 3.207625172  | -2.244542967 |
| H | 3.942823901  | 3.450824152  | -1.179293618 |
| H | 4.794477774  | 2.855106886  | -2.637261194 |
| H | 3.598730353  | 4.144980700  | -2.785060976 |
| H | 0.375599463  | 0.765305197  | -2.549641631 |
| H | 4.618446674  | -0.938056994 | 0.580010192  |
| H | 7.950219597  | 1.227924890  | -0.648992785 |

BORANE E (Intermediate)

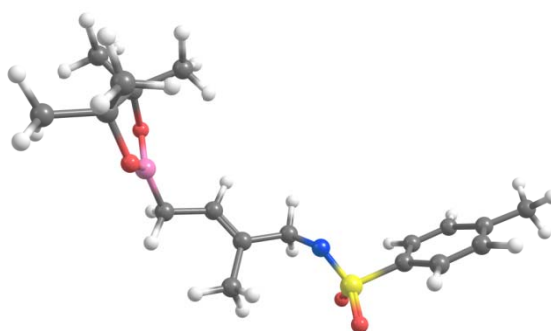

Electronic Energy=-7024.56 kcal/mol

|   |              |             |              |
|---|--------------|-------------|--------------|
| C | -0.802689093 | 1.523831072 | -0.102354495 |
| C | -2.021813092 | 1.571389346 | 0.818869263  |
| H | -2.006297695 | 0.648973664 | 1.433746893  |
| C | 0.319349207  | 2.202820840 | 0.210804498  |
| H | 0.299918276  | 2.804426627 | 1.128896601  |
| C | 1.642673431  | 2.208211426 | -0.544172535 |
| H | 2.365255818  | 1.539327088 | -0.038215402 |
| H | 1.504803945  | 1.816898137 | -1.561418864 |
| C | 3.181171881  | 5.606229227 | 0.193318875  |
| C | 2.963887527  | 5.703375035 | -1.365171473 |
| C | 2.086852153  | 6.310001068 | 1.003659492  |
| H | 2.197901405  | 6.030313200 | 2.060452902  |
| H | 2.160579611  | 7.404623249 | 0.922726960  |
| H | 1.087142799  | 5.996678762 | 0.673768198  |
| C | 4.561033911  | 6.038524428 | 0.683237050  |
| H | 4.736082121  | 7.104268143 | 0.468913995  |
| H | 4.622284239  | 5.895163058 | 1.771315276  |
| H | 5.359482596  | 5.448711615 | 0.216031750  |
| C | 2.236057721  | 6.959834072 | -1.836998138 |
| H | 2.814266135  | 7.863251497 | -1.587019697 |
| H | 2.112708183  | 6.923927901 | -2.928626844 |
| H | 1.239963217  | 7.039975128 | -1.385437621 |
| C | 4.253195426  | 5.505660724 | -2.171124406 |
| H | 3.990166594  | 5.388944920 | -3.231483232 |

|   |              |              |              |
|---|--------------|--------------|--------------|
| H | 4.931079618  | 6.366663152  | -2.073074125 |
| H | 4.784777820  | 4.599665883  | -1.849265965 |
| B | 2.266061466  | 3.647040978  | -0.594261316 |
| O | 2.115912466  | 4.543483942  | -1.642703340 |
| O | 3.029826061  | 4.171918667  | 0.443683944  |
| H | -1.892304273 | 2.426574854  | 1.512003025  |
| C | -0.967583135 | 0.643541504  | -1.309910162 |
| H | -1.832472344 | 0.994351920  | -1.892240008 |
| H | -0.074248364 | 0.604110734  | -1.947131870 |
| H | -1.223558061 | -0.382113188 | -0.994228568 |
| N | -3.265804508 | 1.673862912  | 0.064529808  |
| S | -4.407327835 | 0.638159694  | 0.374020843  |
| O | -4.028606250 | -0.481594161 | 1.284378804  |
| O | -5.129515555 | 0.275488629  | -0.866820716 |
| C | -5.699575168 | 1.537509324  | 1.306122185  |
| C | -5.774834807 | 1.461381121  | 2.702249122  |
| C | -6.626723812 | 2.333995803  | 0.619793419  |
| C | -6.765204238 | 2.164858424  | 3.395819656  |
| H | -5.063561744 | 0.825498273  | 3.231236265  |
| C | -7.612259316 | 3.032229731  | 1.318664729  |
| H | -6.573585675 | 2.376379450  | -0.468568663 |
| C | -7.706185689 | 2.956074025  | 2.718824403  |
| H | -6.817123941 | 2.086458068  | 4.486527425  |
| H | -8.334920556 | 3.640920705  | 0.765772085  |
| C | -8.819541434 | 3.660447503  | 3.463479795  |
| H | -9.700047991 | 3.006342808  | 3.583293081  |
| H | -8.502707207 | 3.965123685  | 4.471397426  |
| H | -9.155133561 | 4.559569029  | 2.926920409  |

BORANE Z (Intermediate)

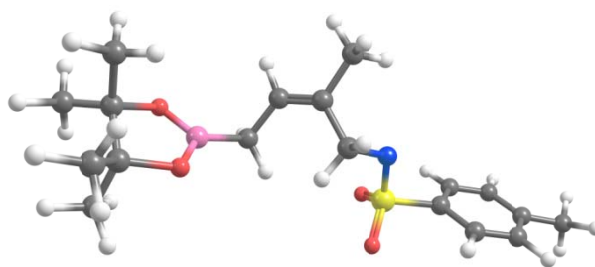

Electronic Energy=-7020.50 kcal/mol

|   |              |             |              |
|---|--------------|-------------|--------------|
| C | -0.777930319 | 1.570863837 | -0.034840311 |
| C | -1.160737485 | 1.197416663 | -1.458123339 |
| H | -2.031900743 | 1.829581179 | -1.736694343 |
| H | -0.359809207 | 1.472425355 | -2.161160522 |
| C | 0.462527669  | 1.904309366 | 0.373238222  |
| H | 0.602208633  | 2.140099020 | 1.437327557  |
| C | 1.730035281  | 1.962880518 | -0.460975899 |
| H | 2.503030014  | 1.346776462 | 0.030905796  |
| H | 1.559505838  | 1.529644953 | -1.454882942 |
| C | 3.024166493  | 5.496751075 | 0.108049349  |
| C | 2.744895051  | 5.510994668 | -1.442564543 |
| C | 1.902213204  | 6.142957365 | 0.929703424  |
| H | 2.073800288  | 5.924232012 | 1.992928240  |
| H | 1.877669602  | 7.235004514 | 0.797352062  |
| H | 0.923531391  | 5.728976108 | 0.651175255  |
| C | 4.378111357  | 6.064536913 | 0.527428587  |
| H | 4.455522402  | 7.129560700 | 0.258182987  |
| H | 4.488571532  | 5.979716316 | 1.617983679  |
| H | 5.206570058  | 5.520689281 | 0.057157429  |
| C | 1.912219286  | 6.689819971 | -1.941104989 |
| H | 2.433867603  | 7.643278424 | -1.762708490 |
| H | 1.746859280  | 6.586428836 | -3.022765269 |
| H | 0.931880784  | 6.723382227 | -1.450492612 |
| C | 4.016478616  | 5.365927446 | -2.287484229 |
| H | 3.724833137  | 5.170137939 | -3.328291605 |

|   |              |              |              |
|---|--------------|--------------|--------------|
| H | 4.631129286  | 6.278221288  | -2.261168519 |
| H | 4.624435849  | 4.519263942  | -1.940582764 |
| B | 2.242725595  | 3.440181086  | -0.570485692 |
| O | 1.972507804  | 4.287072594  | -1.636833817 |
| O | 3.002739777  | 4.066706126  | 0.417648066  |
| C | -1.918748716 | 1.505433467  | 0.949500010  |
| H | -2.715302753 | 2.219210657  | 0.673181406  |
| H | -2.368417810 | 0.500821589  | 0.915689349  |
| H | -1.595010107 | 1.725068682  | 1.977435486  |
| N | -1.554453174 | -0.219793677 | -1.552447477 |
| S | -0.707614185 | -1.097849502 | -2.549232794 |
| C | -1.890594889 | -2.450884299 | -2.846375448 |
| C | -1.808603620 | -3.632891045 | -2.105748430 |
| C | -2.852290188 | -2.337034026 | -3.854825962 |
| C | -2.683196074 | -4.690921675 | -2.373064743 |
| H | -1.039231655 | -3.712289801 | -1.337284124 |
| C | -3.718280222 | -3.400217970 | -4.121428292 |
| H | -2.899432561 | -1.412582588 | -4.431874967 |
| C | -3.645128967 | -4.598165841 | -3.390163711 |
| H | -2.608958989 | -5.612792212 | -1.787742198 |
| H | -4.463000950 | -3.303147992 | -4.917543966 |
| C | -4.540862514 | -5.771549207 | -3.725023676 |
| H | -4.086444686 | -6.412771849 | -4.499294369 |
| H | -4.721203103 | -6.404577148 | -2.844357670 |
| H | -5.515445760 | -5.439023181 | -4.110744272 |
| O | 0.491095160  | -1.794449269 | -1.996273089 |
| O | -0.456910517 | -0.468619252 | -3.884309329 |

BORANE E

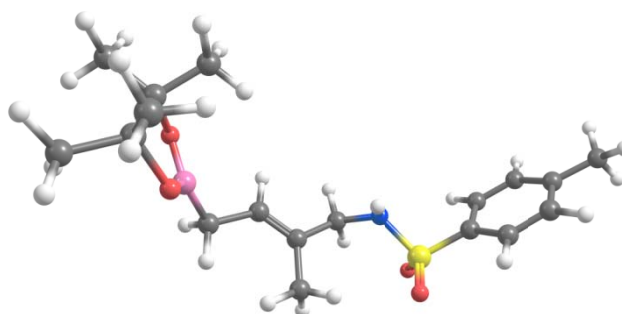

Electronic Energy=-7085.46 kcal/mol

|   |              |              |              |
|---|--------------|--------------|--------------|
| C | -0.617185063 | 1.194993108  | 0.062582529  |
| C | -1.593033397 | 0.993063168  | 1.199471704  |
| H | -1.863167472 | -0.065795895 | 1.305908636  |
| C | 0.567228238  | 1.810628187  | 0.307433298  |
| H | 0.761133736  | 2.135112121  | 1.335741842  |
| C | 1.703300787  | 2.058236110  | -0.663160647 |
| H | 2.570384474  | 1.427547277  | -0.372860014 |
| H | 1.424831032  | 1.755778511  | -1.681151575 |
| C | 2.958073345  | 5.571329984  | 0.124977323  |
| C | 2.744735488  | 5.651707982  | -1.435758549 |
| C | 1.817265130  | 6.208094874  | 0.926055609  |
| H | 1.941733548  | 5.944917415  | 1.986696378  |
| H | 1.823667246  | 7.306139397  | 0.836120313  |
| H | 0.839902004  | 5.828325728  | 0.593670984  |
| C | 4.306002010  | 6.088775482  | 0.622417410  |
| H | 4.422544869  | 7.163296182  | 0.393421964  |
| H | 4.362797226  | 5.964830126  | 1.715264153  |
| H | 5.143639651  | 5.538036302  | 0.170415017  |
| C | 1.941418446  | 6.857254478  | -1.918024680 |
| H | 2.460589912  | 7.798724978  | -1.667451958 |
| H | 1.829863728  | 6.808421031  | -3.012230669 |
| H | 0.937955191  | 6.875658260  | -1.471828306 |
| C | 4.049675934  | 5.533124969  | -2.232044465 |
| H | 3.802485659  | 5.393994717  | -3.295119504 |
| H | 4.668595322  | 6.441203837  | -2.133394871 |

|   |              |              |              |
|---|--------------|--------------|--------------|
| H | 4.640720506  | 4.666121747  | -1.899479687 |
| B | 2.177238798  | 3.557292263  | -0.664444328 |
| O | 1.971541814  | 4.437570360  | -1.717351571 |
| O | 2.897363403  | 4.127263909  | 0.377962282  |
| H | -1.119048088 | 1.311740691  | 2.142118331  |
| C | -1.051614733 | 0.668487068  | -1.280616984 |
| H | -2.061296389 | 1.028373978  | -1.534822998 |
| H | -0.365243351 | 0.948864716  | -2.089548493 |
| H | -1.124387450 | -0.432297669 | -1.258959207 |
| N | -2.894851325 | 1.714991619  | 1.087926150  |
| S | -4.299244270 | 0.914933955  | 0.471111955  |
| O | -4.097375611 | -0.468254099 | 0.947421599  |
| O | -4.418592293 | 1.170786678  | -0.981905877 |
| C | -5.638450358 | 1.658813239  | 1.260853834  |
| C | -5.838357996 | 1.473390933  | 2.664956508  |
| C | -6.535894436 | 2.506991728  | 0.547066761  |
| C | -6.897660670 | 2.099277762  | 3.298731836  |
| H | -5.157327538 | 0.832522531  | 3.221763724  |
| C | -7.589767171 | 3.113643800  | 1.211381664  |
| H | -6.388967599 | 2.647640534  | -0.521657437 |
| C | -7.808300863 | 2.935104607  | 2.602969755  |
| H | -7.036792475 | 1.939266923  | 4.372054308  |
| H | -8.277429017 | 3.744707699  | 0.640906829  |
| C | -8.998563050 | 3.542768708  | 3.296739033  |
| H | -9.871073563 | 2.858528164  | 3.334168818  |
| H | -8.768959770 | 3.811904058  | 4.340131507  |
| H | -9.339707970 | 4.457357515  | 2.787717577  |
| H | -2.802085234 | 2.614665041  | 0.607762360  |



BORANE Z

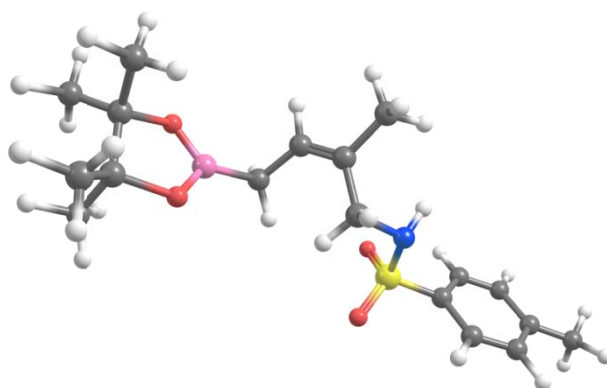

Electronic Energy=-7081.70 kcal/mol

|   |              |             |              |
|---|--------------|-------------|--------------|
| C | -0.744981769 | 1.592612135 | -0.037604531 |
| C | -1.179382947 | 1.338949560 | -1.459124123 |
| H | -1.979875577 | 2.054632714 | -1.720623269 |
| H | -0.368511363 | 1.503387273 | -2.176637857 |
| C | 0.534807180  | 1.811866828 | 0.345150224  |
| H | 0.714097497  | 1.989955110 | 1.412325238  |
| C | 1.770353616  | 1.888343139 | -0.523820362 |
| H | 2.565663272  | 1.274008562 | -0.069654935 |
| H | 1.580546880  | 1.478235284 | -1.523366317 |
| C | 2.997617664  | 5.441006158 | 0.106256777  |
| C | 2.706670195  | 5.479251302 | -1.442162833 |
| C | 1.869313673  | 6.048221884 | 0.947732021  |
| H | 2.051621001  | 5.811240066 | 2.005761936  |
| H | 1.830865718  | 7.143654302 | 0.837866005  |
| H | 0.894065017  | 5.626883864 | 0.664751986  |
| C | 4.342913025  | 6.026373939 | 0.526617165  |
| H | 4.399140384  | 7.097393785 | 0.264661797  |
| H | 4.457565491  | 5.935826971 | 1.617251572  |
| H | 5.180288797  | 5.501638770 | 0.047848191  |
| C | 1.852628710  | 6.653832431 | -1.911396693 |
| H | 2.362772588  | 7.610851291 | -1.706827645 |
| H | 1.689368305  | 6.576987492 | -2.996293203 |
| H | 0.872583144  | 6.662096732 | -1.417194379 |

|   |              |              |              |
|---|--------------|--------------|--------------|
| C | 3.973610905  | 5.369615837  | -2.297697389 |
| H | 3.678672815  | 5.190565701  | -3.340935746 |
| H | 4.570350387  | 6.294609027  | -2.255450460 |
| H | 4.600461014  | 4.528421338  | -1.969234049 |
| B | 2.253592193  | 3.385021162  | -0.606486042 |
| O | 1.952026622  | 4.239436640  | -1.654404654 |
| O | 3.005866143  | 3.998983083  | 0.387789787  |
| C | -1.853714515 | 1.583679079  | 0.991252185  |
| H | -2.640214978 | 2.315754207  | 0.736862564  |
| H | -2.355901206 | 0.602273413  | 1.056156019  |
| H | -1.471930119 | 1.823208901  | 1.993381765  |
| N | -1.740890952 | -0.033869454 | -1.719793396 |
| S | -0.720425078 | -1.149705089 | -2.592183679 |
| C | -1.767018748 | -2.477885674 | -2.937420091 |
| C | -1.710206677 | -3.671193492 | -2.149535311 |
| C | -2.792400957 | -2.360071005 | -3.931709782 |
| C | -2.621346398 | -4.692083155 | -2.372637756 |
| H | -0.931708023 | -3.767602909 | -1.392758388 |
| C | -3.686643110 | -3.399639077 | -4.127040147 |
| H | -2.850585480 | -1.452276361 | -4.532434438 |
| C | -3.638974925 | -4.595881080 | -3.360728710 |
| H | -2.548524765 | -5.603220555 | -1.768847599 |
| H | -4.455966113 | -3.293613413 | -4.899829746 |
| C | -4.577415504 | -5.742598532 | -3.635296782 |
| H | -4.181425636 | -6.453605290 | -4.391844460 |
| H | -4.774554942 | -6.332849524 | -2.724999580 |
| H | -5.549404847 | -5.388990893 | -4.016944364 |
| O | 0.378461520  | -1.613227894 | -1.717191270 |
| O | -0.391054364 | -0.374221743 | -3.804540498 |
| H | -1.968167948 | -0.504361877 | -0.837215397 |

## References

1. a) E. Baron, P. O'Brien, T. D. Towers, *Tetrahedron Letters*, **2002**, 43, 723; b) J. G. Knight, M. P. Muldowney, *Synlett.*, **1995**, 949.
2. S. Crotti, F. Bertolini, F. Macchia, M. Pineschi, *Org. Lett.*, **2009**, 11, 3762.
3. a) R. J. Ely, J. P. Morken, *Org. Lett.*, 2010, 12, 4348; b) C. Kaneko, A. Sugimoto, S. Tanaka, *Synthesis.*, **1974**, 876.
4. G. te Velde, F. M. Bickelhaupt, E. J. Baerends, C. F. Guerra, S. J. A. Van Gisbergen, J. G. Snijders, T. Ziegler, *J. Comput. Chem.*, **2001**, 22, 931.
5. C. Fonseca Guerra, J. G. Snijders, G. te Velde, E. J. Baerends, *Theor. Chem. Acc.*, **1998**, 99, 391.
6. E. van Lenthe, A. Ehlers, E. J. Baerends, *J. Chem. Phys.*, **1999**, 110, 8943.
7. S. H. Vosko, L. Wilk, M. Nusair, *Can. J. Phys.*, **1980**, 58, 1200.
8. A. D. Becke, *Phys. Rev. A*, **1988**, 38, 3098.
9. J. P. Perdew, *Phys. Rev. B*, **1986**, 33, 8822.
10. J. P. Perdew, *Phys. Rev. B*, **1986**, 34, 7406.
11. A. Klamt, G. Schuurmann, *J. Chem. Soc. Perkin Trans. 2*, **1993**, 799.
12. Y. Zhao and D.G. Truhlar, *J. Chem. Phys.* **2006**, 125, 194101. Y. Zhao, D.G. Truhlar, *Theor. Chem. Acc.*, **2008**, 120, 215.
13. Casey P. Kelly, Christopher J. Cramer, Donald G. Truhlar *J. Phys. Chem. B*, **2006**, 110, 16066-16081.
14. M. J. Frisch, G. W. Trucks, H. B. Schlegel, G. E. Scuseria, M. A. Robb, J. R. Cheeseman, G. Scalmani, V. Barone, B. Mennucci, G. A. Petersson, H. Nakatsuji, M. Caricato, X. Li, H. P. Hratchian, A. F. Izmaylov, J. Bloino, G. Zheng, J. L. Sonnenberg, M. Hada, M. Ehara, K. Toyota, R. Fukuda, J. Hasegawa, M. Ishida, T. Nakajima, Y. Honda, O. Kitao, H. Nakai, T. Vreven, J.A. Montgomery, Jr., J. E. Peralta, F. Ogliaro, M. Bearpark, J. J. Heyd, E. Brothers, K. N. Kudin, V. N. Staroverov, R. Kobayashi, J. Normand, K. Raghavachari, A. Rendell, J. C. Burant, S. S. Iyengar, J. Tomasi, M. Cossi, N. Rega, J. M. Millam, M. Klene, J. E. Knox, J. B. Cross, V. Bakken, C. Adamo, J. Jaramillo, R. Gomperts, R. E. Stratmann, O. Yazyev, A. J. Austin, R. Cammi, C. Pomelli, J. W. Ochterski, R. L. Martin, K. Morokuma, V. G. Zakrzewski, G. A. Voth, P. Salvador, J. J. Dannenberg, S. Dapprich, A. Daniels, O. Farkas, J. B. Foresman, J. V. Ortiz, J. Cioslowski, and D. J. Fox, Gaussian, Inc., Wallingford CT, 2009.

15. P. J. Stephens, F. J. Devlin, C. F. Chabalowski and M. J. Frisch, *J. Phys. Chem.*, **1994**, *98*, 11623.
16. W.J. Hehre, R. Ditchfield, J. A. Pople, *J. Chem. Phys.*, **1972**, *56*, 2257.
17. V. Barone and M. Cossi, *J. Phys. Chem. A*, **1998**, *102*, 1995.
